# Supplementary material for: Evaluation of VectoMax FG application frequency for the control of Aedes albopictus and Culex species in urban catch basins: evidence from a randomised controlled trial
Source: Parasit Vectors. 2025 Nov 27;18:511. doi: 10.1186/s13071-025-07169-0 (PMC12752035; doi:10.1186/s13071-025-07169-0)
Supplement: Supplementary file 2 — Additional file 2. [file 13071_2025_7169_MOESM2_ESM.xlsx]

## Sheet: Legend
Variables	Description	Range	Data type	Unit
trapID	Identification of individual catch basins	1-180	numeric	-
Interval	Interval of Treatment (VectoMax FG) application	0 (Control) - 10 weeks	numerical	-
time	Sampling date	29.07.24-24.10.24	Date	-
week_of_year	Calendar week in the year 2024	31-43	numeric	-
day	Day of the week	Monday-Thursday	string	-
street	Name of street catch basin is located on	-	string	-
x	Longitudinal coordinates of catch basin	2609299.657 - 2611059.74201123	numerical	-
y	Latitudinal coordinates of catch basin	1267581.5283322 - 1269568.06526422	numerical	-
trap_status	Evaluation of trap	functioning/nonfunctioning	binary/string	-
taxon	Identified taxa	Aedes albopictus, Culex spp., Chironomidae, Psychodidae	string	-
mosq_f	Count of female diptera	0-242	numeric	-
mosq_m	Count of male diptera	0-112	numeric	-
mosq_un	Count of unidentifiable diptera sex	0-43	numeric	-
mosq_total	Total count of diptera	0-242	numeric	-
temperature	Weekly mean temperature	11.6 - 29.1	numeric	°C
precipitation	Weekly mean precipitation	0 - 35	numeric	mm
comments	Description of: Catch basin abnormalities Missing data explanation	Leaves covering catch basin Broken /Fell over/Parked over	string	-

## Sheet: Data
TrapID	Interval	time	week_of_year	day	street	x	y	trap_status	taxon	mosq_f	mosq_m	mosq_un	mosq_total	temperature	precipitation	comments
123	0	2024-10-01	40	tuesday	Elsässerstrasse	2.61007e+06	1.26953e+06	nonfunctioning						14.9	35	fell over
120	8	2024-10-01	40	tuesday	Kohlenstrasse	2.61013e+06	1.26949e+06	functioning	aedes	0	0	0	0	14.9	35
120	8	2024-10-01	40	tuesday	Kohlenstrasse	2.61013e+06	1.26949e+06	functioning	chironomidae	0	0	0	0	14.9	35
120	8	2024-10-01	40	tuesday	Kohlenstrasse	2.61013e+06	1.26949e+06	functioning	culex	0	0	0	0	14.9	35
120	8	2024-10-01	40	tuesday	Kohlenstrasse	2.61013e+06	1.26949e+06	functioning	psychodidae	0	0	0	0	14.9	35
120	8	2024-10-01	40	tuesday	Kohlenstrasse	2.61013e+06	1.26949e+06	functioning	undefined	0	0	0	0	14.9	35
134	2	2024-10-01	40	tuesday	Lysbüchelstrasse	2.60999e+06	1.26944e+06	functioning	aedes	0	0	0	0	14.9	35
134	2	2024-10-01	40	tuesday	Lysbüchelstrasse	2.60999e+06	1.26944e+06	functioning	chironomidae	0	0	0	0	14.9	35
134	2	2024-10-01	40	tuesday	Lysbüchelstrasse	2.60999e+06	1.26944e+06	functioning	culex	0	0	0	0	14.9	35
134	2	2024-10-01	40	tuesday	Lysbüchelstrasse	2.60999e+06	1.26944e+06	functioning	psychodidae	0	0	0	0	14.9	35
134	2	2024-10-01	40	tuesday	Lysbüchelstrasse	2.60999e+06	1.26944e+06	functioning	undefined	0	0	0	0	14.9	35
129	8	2024-10-01	40	tuesday	Lysbüchelstrasse	2.61001e+06	1.26941e+06	functioning	aedes	0	0	0	0	14.9	35
129	8	2024-10-01	40	tuesday	Lysbüchelstrasse	2.61001e+06	1.26941e+06	functioning	chironomidae	0	0	0	0	14.9	35
129	8	2024-10-01	40	tuesday	Lysbüchelstrasse	2.61001e+06	1.26941e+06	functioning	culex	0	0	0	0	14.9	35
129	8	2024-10-01	40	tuesday	Lysbüchelstrasse	2.61001e+06	1.26941e+06	functioning	psychodidae	0	0	0	0	14.9	35
129	8	2024-10-01	40	tuesday	Lysbüchelstrasse	2.61001e+06	1.26941e+06	functioning	undefined	0	0	0	0	14.9	35
147	4	2024-10-01	40	tuesday	Hagenaustrasse	2.60982e+06	1.26927e+06	functioning	aedes	0	0	0	0	14.9	35
147	4	2024-10-01	40	tuesday	Hagenaustrasse	2.60982e+06	1.26927e+06	functioning	chironomidae	0	0	0	0	14.9	35
147	4	2024-10-01	40	tuesday	Hagenaustrasse	2.60982e+06	1.26927e+06	functioning	culex	0	0	0	0	14.9	35
147	4	2024-10-01	40	tuesday	Hagenaustrasse	2.60982e+06	1.26927e+06	functioning	psychodidae	0	0	0	0	14.9	35
147	4	2024-10-01	40	tuesday	Hagenaustrasse	2.60982e+06	1.26927e+06	functioning	undefined	0	0	0	0	14.9	35
121	8	2024-10-01	40	tuesday	Lysbüchelstrasse	2.6101e+06	1.26923e+06	nonfunctioning						14.9	35	parked over
156	8	2024-10-01	40	tuesday	Hagenaustrasse	2.60977e+06	1.26919e+06	functioning	aedes	0	0	0	0	14.9	35
156	8	2024-10-01	40	tuesday	Hagenaustrasse	2.60977e+06	1.26919e+06	functioning	chironomidae	0	0	0	0	14.9	35
156	8	2024-10-01	40	tuesday	Hagenaustrasse	2.60977e+06	1.26919e+06	functioning	culex	0	0	0	0	14.9	35
156	8	2024-10-01	40	tuesday	Hagenaustrasse	2.60977e+06	1.26919e+06	functioning	psychodidae	0	0	0	0	14.9	35
156	8	2024-10-01	40	tuesday	Hagenaustrasse	2.60977e+06	1.26919e+06	functioning	undefined	0	0	0	0	14.9	35
159	0	2024-10-01	40	tuesday	Hagenaustrasse	2.60976e+06	1.26918e+06	functioning	chironomidae	1	0	0	1	14.9	35
159	0	2024-10-01	40	tuesday	Hagenaustrasse	2.60976e+06	1.26918e+06	functioning	aedes	0	0	0	0	14.9	35
159	0	2024-10-01	40	tuesday	Hagenaustrasse	2.60976e+06	1.26918e+06	functioning	culex	0	0	0	0	14.9	35
159	0	2024-10-01	40	tuesday	Hagenaustrasse	2.60976e+06	1.26918e+06	functioning	psychodidae	0	0	0	0	14.9	35
159	0	2024-10-01	40	tuesday	Hagenaustrasse	2.60976e+06	1.26918e+06	functioning	undefined	0	0	0	0	14.9	35
157	4	2024-10-01	40	tuesday	Hagenaustrasse	2.60977e+06	1.26916e+06	functioning	aedes	0	0	0	0	14.9	35
157	4	2024-10-01	40	tuesday	Hagenaustrasse	2.60977e+06	1.26916e+06	functioning	chironomidae	0	0	0	0	14.9	35
157	4	2024-10-01	40	tuesday	Hagenaustrasse	2.60977e+06	1.26916e+06	functioning	culex	0	0	0	0	14.9	35
157	4	2024-10-01	40	tuesday	Hagenaustrasse	2.60977e+06	1.26916e+06	functioning	psychodidae	0	0	0	0	14.9	35
157	4	2024-10-01	40	tuesday	Hagenaustrasse	2.60977e+06	1.26916e+06	functioning	undefined	0	0	0	0	14.9	35
73	2	2024-10-01	40	tuesday	Kraftstrasse	2.61042e+06	1.26915e+06	nonfunctioning						14.9	35	Cup broke
128	8	2024-10-01	40	tuesday	Lysbüchelstrasse	2.61002e+06	1.26915e+06	functioning	aedes	0	0	0	0	14.9	35
128	8	2024-10-01	40	tuesday	Lysbüchelstrasse	2.61002e+06	1.26915e+06	functioning	chironomidae	0	0	0	0	14.9	35
128	8	2024-10-01	40	tuesday	Lysbüchelstrasse	2.61002e+06	1.26915e+06	functioning	culex	0	0	0	0	14.9	35
128	8	2024-10-01	40	tuesday	Lysbüchelstrasse	2.61002e+06	1.26915e+06	functioning	psychodidae	0	0	0	0	14.9	35
128	8	2024-10-01	40	tuesday	Lysbüchelstrasse	2.61002e+06	1.26915e+06	functioning	undefined	0	0	0	0	14.9	35
178	8	2024-10-01	40	tuesday	Friedrich Miescher-Strasse	2.60934e+06	1.2691e+06	functioning	aedes	0	0	0	0	14.9	35
178	8	2024-10-01	40	tuesday	Friedrich Miescher-Strasse	2.60934e+06	1.2691e+06	functioning	chironomidae	0	0	0	0	14.9	35
178	8	2024-10-01	40	tuesday	Friedrich Miescher-Strasse	2.60934e+06	1.2691e+06	functioning	culex	0	0	0	0	14.9	35
178	8	2024-10-01	40	tuesday	Friedrich Miescher-Strasse	2.60934e+06	1.2691e+06	functioning	psychodidae	0	0	0	0	14.9	35
178	8	2024-10-01	40	tuesday	Friedrich Miescher-Strasse	2.60934e+06	1.2691e+06	functioning	undefined	0	0	0	0	14.9	35
180	4	2024-10-01	40	tuesday	Friedrich Miescher-Strasse	2.6093e+06	1.26907e+06	functioning	aedes	0	0	0	0	14.9	35
180	4	2024-10-01	40	tuesday	Friedrich Miescher-Strasse	2.6093e+06	1.26907e+06	functioning	chironomidae	0	0	0	0	14.9	35
180	4	2024-10-01	40	tuesday	Friedrich Miescher-Strasse	2.6093e+06	1.26907e+06	functioning	culex	0	0	0	0	14.9	35
180	4	2024-10-01	40	tuesday	Friedrich Miescher-Strasse	2.6093e+06	1.26907e+06	functioning	psychodidae	0	0	0	0	14.9	35
180	4	2024-10-01	40	tuesday	Friedrich Miescher-Strasse	2.6093e+06	1.26907e+06	functioning	undefined	0	0	0	0	14.9	35
155	4	2024-10-01	40	tuesday	Neudorfstrasse	2.60977e+06	1.26906e+06	functioning	aedes	0	0	0	0	14.9	35
155	4	2024-10-01	40	tuesday	Neudorfstrasse	2.60977e+06	1.26906e+06	functioning	chironomidae	0	0	0	0	14.9	35
155	4	2024-10-01	40	tuesday	Neudorfstrasse	2.60977e+06	1.26906e+06	functioning	culex	0	0	0	0	14.9	35
155	4	2024-10-01	40	tuesday	Neudorfstrasse	2.60977e+06	1.26906e+06	functioning	psychodidae	0	0	0	0	14.9	35
155	4	2024-10-01	40	tuesday	Neudorfstrasse	2.60977e+06	1.26906e+06	functioning	undefined	0	0	0	0	14.9	35
12	6	2024-10-01	40	tuesday	Mülhauserstrasse	2.61087e+06	1.26886e+06	functioning	aedes	0	0	0	0	14.9	35
12	6	2024-10-01	40	tuesday	Mülhauserstrasse	2.61087e+06	1.26886e+06	functioning	chironomidae	0	0	0	0	14.9	35
12	6	2024-10-01	40	tuesday	Mülhauserstrasse	2.61087e+06	1.26886e+06	functioning	culex	0	0	0	0	14.9	35
12	6	2024-10-01	40	tuesday	Mülhauserstrasse	2.61087e+06	1.26886e+06	functioning	psychodidae	0	0	0	0	14.9	35
12	6	2024-10-01	40	tuesday	Mülhauserstrasse	2.61087e+06	1.26886e+06	functioning	undefined	0	0	0	0	14.9	35
138	2	2024-10-01	40	tuesday	Wasensträsschen	2.60989e+06	1.26886e+06	functioning	undefined	6	0	6	6	14.9	35
138	2	2024-10-01	40	tuesday	Wasensträsschen	2.60989e+06	1.26886e+06	functioning	chironomidae	2	0	1	2	14.9	35
138	2	2024-10-01	40	tuesday	Wasensträsschen	2.60989e+06	1.26886e+06	functioning	aedes	0	0	0	0	14.9	35
138	2	2024-10-01	40	tuesday	Wasensträsschen	2.60989e+06	1.26886e+06	functioning	culex	0	0	0	0	14.9	35
138	2	2024-10-01	40	tuesday	Wasensträsschen	2.60989e+06	1.26886e+06	functioning	psychodidae	0	0	0	0	14.9	35
13	4	2024-10-01	40	tuesday	Mülhauserstrasse	2.61087e+06	1.26884e+06	nonfunctioning						14.9	35	fell over
68	2	2024-10-01	40	tuesday	Wattstrasse	2.61045e+06	1.26883e+06	functioning	aedes	0	0	0	0	14.9	35
68	2	2024-10-01	40	tuesday	Wattstrasse	2.61045e+06	1.26883e+06	functioning	chironomidae	0	0	0	0	14.9	35
68	2	2024-10-01	40	tuesday	Wattstrasse	2.61045e+06	1.26883e+06	functioning	culex	0	0	0	0	14.9	35
68	2	2024-10-01	40	tuesday	Wattstrasse	2.61045e+06	1.26883e+06	functioning	psychodidae	0	0	0	0	14.9	35
68	2	2024-10-01	40	tuesday	Wattstrasse	2.61045e+06	1.26883e+06	functioning	undefined	0	0	0	0	14.9	35
55	6	2024-10-01	40	tuesday	Murbacherstrasse	2.61051e+06	1.26879e+06	functioning	aedes	0	0	0	0	14.9	35
55	6	2024-10-01	40	tuesday	Murbacherstrasse	2.61051e+06	1.26879e+06	functioning	chironomidae	0	0	0	0	14.9	35
55	6	2024-10-01	40	tuesday	Murbacherstrasse	2.61051e+06	1.26879e+06	functioning	culex	0	0	0	0	14.9	35
55	6	2024-10-01	40	tuesday	Murbacherstrasse	2.61051e+06	1.26879e+06	functioning	psychodidae	0	0	0	0	14.9	35
55	6	2024-10-01	40	tuesday	Murbacherstrasse	2.61051e+06	1.26879e+06	functioning	undefined	0	0	0	0	14.9	35
20	10	2024-10-01	40	tuesday	Mülhauserstrasse	2.61078e+06	1.26876e+06	nonfunctioning						14.9	35	fell over
168	8	2024-10-01	40	tuesday	Gustav Wenk-Strasse	2.60964e+06	1.26871e+06	functioning	aedes	0	0	0	0	14.9	35
168	8	2024-10-01	40	tuesday	Gustav Wenk-Strasse	2.60964e+06	1.26871e+06	functioning	chironomidae	0	0	0	0	14.9	35
168	8	2024-10-01	40	tuesday	Gustav Wenk-Strasse	2.60964e+06	1.26871e+06	functioning	culex	0	0	0	0	14.9	35
168	8	2024-10-01	40	tuesday	Gustav Wenk-Strasse	2.60964e+06	1.26871e+06	functioning	psychodidae	0	0	0	0	14.9	35
168	8	2024-10-01	40	tuesday	Gustav Wenk-Strasse	2.60964e+06	1.26871e+06	functioning	undefined	0	0	0	0	14.9	35
76	4	2024-10-01	40	tuesday	Lothringerstrasse	2.61041e+06	1.26869e+06	functioning	aedes	0	0	0	0	14.9	35
76	4	2024-10-01	40	tuesday	Lothringerstrasse	2.61041e+06	1.26869e+06	functioning	chironomidae	0	0	0	0	14.9	35
76	4	2024-10-01	40	tuesday	Lothringerstrasse	2.61041e+06	1.26869e+06	functioning	culex	0	0	0	0	14.9	35
76	4	2024-10-01	40	tuesday	Lothringerstrasse	2.61041e+06	1.26869e+06	functioning	psychodidae	0	0	0	0	14.9	35
76	4	2024-10-01	40	tuesday	Lothringerstrasse	2.61041e+06	1.26869e+06	functioning	undefined	0	0	0	0	14.9	35
78	8	2024-10-01	40	tuesday	Lothringerstrasse	2.61041e+06	1.26869e+06	functioning	aedes	0	0	0	0	14.9	35
78	8	2024-10-01	40	tuesday	Lothringerstrasse	2.61041e+06	1.26869e+06	functioning	chironomidae	0	0	0	0	14.9	35
78	8	2024-10-01	40	tuesday	Lothringerstrasse	2.61041e+06	1.26869e+06	functioning	culex	0	0	0	0	14.9	35
78	8	2024-10-01	40	tuesday	Lothringerstrasse	2.61041e+06	1.26869e+06	functioning	psychodidae	0	0	0	0	14.9	35
78	8	2024-10-01	40	tuesday	Lothringerstrasse	2.61041e+06	1.26869e+06	functioning	undefined	0	0	0	0	14.9	35
34	10	2024-10-01	40	tuesday	Mülhauserstrasse	2.61067e+06	1.26867e+06	functioning	aedes	0	0	0	0	14.9	35
34	10	2024-10-01	40	tuesday	Mülhauserstrasse	2.61067e+06	1.26867e+06	functioning	chironomidae	0	0	0	0	14.9	35
34	10	2024-10-01	40	tuesday	Mülhauserstrasse	2.61067e+06	1.26867e+06	functioning	culex	0	0	0	0	14.9	35
34	10	2024-10-01	40	tuesday	Mülhauserstrasse	2.61067e+06	1.26867e+06	functioning	psychodidae	0	0	0	0	14.9	35
34	10	2024-10-01	40	tuesday	Mülhauserstrasse	2.61067e+06	1.26867e+06	functioning	undefined	0	0	0	0	14.9	35
18	6	2024-10-01	40	tuesday	Elsässerrheinweg	2.61083e+06	1.26866e+06	functioning	aedes	0	0	0	0	14.9	35
18	6	2024-10-01	40	tuesday	Elsässerrheinweg	2.61083e+06	1.26866e+06	functioning	chironomidae	0	0	0	0	14.9	35
18	6	2024-10-01	40	tuesday	Elsässerrheinweg	2.61083e+06	1.26866e+06	functioning	culex	0	0	0	0	14.9	35
18	6	2024-10-01	40	tuesday	Elsässerrheinweg	2.61083e+06	1.26866e+06	functioning	psychodidae	0	0	0	0	14.9	35
18	6	2024-10-01	40	tuesday	Elsässerrheinweg	2.61083e+06	1.26866e+06	functioning	undefined	0	0	0	0	14.9	35
69	8	2024-10-01	40	tuesday	Lothringerstrasse	2.61044e+06	1.26863e+06	functioning	psychodidae	17	0	17	17	14.9	35
69	8	2024-10-01	40	tuesday	Lothringerstrasse	2.61044e+06	1.26863e+06	functioning	chironomidae	4	1	3	4	14.9	35
69	8	2024-10-01	40	tuesday	Lothringerstrasse	2.61044e+06	1.26863e+06	functioning	aedes	0	0	0	0	14.9	35
69	8	2024-10-01	40	tuesday	Lothringerstrasse	2.61044e+06	1.26863e+06	functioning	culex	0	0	0	0	14.9	35
69	8	2024-10-01	40	tuesday	Lothringerstrasse	2.61044e+06	1.26863e+06	functioning	undefined	0	0	0	0	14.9	35
95	10	2024-10-01	40	tuesday	Vogesenstrasse	2.61033e+06	1.26862e+06	functioning	aedes	0	0	0	0	14.9	35
95	10	2024-10-01	40	tuesday	Vogesenstrasse	2.61033e+06	1.26862e+06	functioning	chironomidae	0	0	0	0	14.9	35
95	10	2024-10-01	40	tuesday	Vogesenstrasse	2.61033e+06	1.26862e+06	functioning	culex	0	0	0	0	14.9	35
95	10	2024-10-01	40	tuesday	Vogesenstrasse	2.61033e+06	1.26862e+06	functioning	psychodidae	0	0	0	0	14.9	35
95	10	2024-10-01	40	tuesday	Vogesenstrasse	2.61033e+06	1.26862e+06	functioning	undefined	0	0	0	0	14.9	35
132	6	2024-10-01	40	tuesday	Lenzgasse	2.61001e+06	1.26861e+06	functioning	chironomidae	10	4	2	10	14.9	35
132	6	2024-10-01	40	tuesday	Lenzgasse	2.61001e+06	1.26861e+06	functioning	psychodidae	1	0	1	1	14.9	35
132	6	2024-10-01	40	tuesday	Lenzgasse	2.61001e+06	1.26861e+06	functioning	aedes	0	0	0	0	14.9	35
132	6	2024-10-01	40	tuesday	Lenzgasse	2.61001e+06	1.26861e+06	functioning	culex	0	0	0	0	14.9	35
132	6	2024-10-01	40	tuesday	Lenzgasse	2.61001e+06	1.26861e+06	functioning	undefined	0	0	0	0	14.9	35
165	0	2024-10-01	40	tuesday	Luzernerring	2.60967e+06	1.26861e+06	functioning	aedes	0	0	0	0	14.9	35
165	0	2024-10-01	40	tuesday	Luzernerring	2.60967e+06	1.26861e+06	functioning	chironomidae	0	0	0	0	14.9	35
165	0	2024-10-01	40	tuesday	Luzernerring	2.60967e+06	1.26861e+06	functioning	culex	0	0	0	0	14.9	35
165	0	2024-10-01	40	tuesday	Luzernerring	2.60967e+06	1.26861e+06	functioning	psychodidae	0	0	0	0	14.9	35
165	0	2024-10-01	40	tuesday	Luzernerring	2.60967e+06	1.26861e+06	functioning	undefined	0	0	0	0	14.9	35
160	2	2024-10-01	40	tuesday	Septerstrasse	2.60976e+06	1.26858e+06	nonfunctioning						14.9	35	parked over
43	10	2024-10-01	40	tuesday	Jungstrasse	2.61063e+06	1.26856e+06	nonfunctioning						14.9	35	fell over
110	4	2024-10-01	40	tuesday	Im Davidsboden	2.61024e+06	1.26856e+06	functioning	aedes	0	0	0	0	14.9	35
110	4	2024-10-01	40	tuesday	Im Davidsboden	2.61024e+06	1.26856e+06	functioning	chironomidae	0	0	0	0	14.9	35
110	4	2024-10-01	40	tuesday	Im Davidsboden	2.61024e+06	1.26856e+06	functioning	culex	0	0	0	0	14.9	35
110	4	2024-10-01	40	tuesday	Im Davidsboden	2.61024e+06	1.26856e+06	functioning	psychodidae	0	0	0	0	14.9	35
110	4	2024-10-01	40	tuesday	Im Davidsboden	2.61024e+06	1.26856e+06	functioning	undefined	0	0	0	0	14.9	35
158	10	2024-10-01	40	tuesday	Largitzenstrasse	2.60977e+06	1.26851e+06	functioning	psychodidae	1	0	1	1	14.9	35
158	10	2024-10-01	40	tuesday	Largitzenstrasse	2.60977e+06	1.26851e+06	functioning	aedes	0	0	0	0	14.9	35
158	10	2024-10-01	40	tuesday	Largitzenstrasse	2.60977e+06	1.26851e+06	functioning	chironomidae	0	0	0	0	14.9	35
158	10	2024-10-01	40	tuesday	Largitzenstrasse	2.60977e+06	1.26851e+06	functioning	culex	0	0	0	0	14.9	35
158	10	2024-10-01	40	tuesday	Largitzenstrasse	2.60977e+06	1.26851e+06	functioning	undefined	0	0	0	0	14.9	35
60	6	2024-10-01	40	tuesday	Jungstrasse	2.6105e+06	1.26848e+06	functioning	aedes	0	0	0	0	14.9	35
60	6	2024-10-01	40	tuesday	Jungstrasse	2.6105e+06	1.26848e+06	functioning	chironomidae	0	0	0	0	14.9	35
60	6	2024-10-01	40	tuesday	Jungstrasse	2.6105e+06	1.26848e+06	functioning	culex	0	0	0	0	14.9	35
60	6	2024-10-01	40	tuesday	Jungstrasse	2.6105e+06	1.26848e+06	functioning	psychodidae	0	0	0	0	14.9	35
60	6	2024-10-01	40	tuesday	Jungstrasse	2.6105e+06	1.26848e+06	functioning	undefined	0	0	0	0	14.9	35
49	2	2024-10-01	40	tuesday	Lothringerstrasse	2.61058e+06	1.26844e+06	functioning	aedes	0	0	0	0	14.9	35
49	2	2024-10-01	40	tuesday	Lothringerstrasse	2.61058e+06	1.26844e+06	functioning	chironomidae	0	0	0	0	14.9	35
49	2	2024-10-01	40	tuesday	Lothringerstrasse	2.61058e+06	1.26844e+06	functioning	culex	0	0	0	0	14.9	35
49	2	2024-10-01	40	tuesday	Lothringerstrasse	2.61058e+06	1.26844e+06	functioning	psychodidae	0	0	0	0	14.9	35
49	2	2024-10-01	40	tuesday	Lothringerstrasse	2.61058e+06	1.26844e+06	functioning	undefined	0	0	0	0	14.9	35
169	2	2024-10-01	40	tuesday	Luzernerring	2.60954e+06	1.26844e+06	functioning	aedes	0	0	0	0	14.9	35	full of sand
169	2	2024-10-01	40	tuesday	Luzernerring	2.60954e+06	1.26844e+06	functioning	chironomidae	0	0	0	0	14.9	35	full of sand
169	2	2024-10-01	40	tuesday	Luzernerring	2.60954e+06	1.26844e+06	functioning	culex	0	0	0	0	14.9	35	full of sand
169	2	2024-10-01	40	tuesday	Luzernerring	2.60954e+06	1.26844e+06	functioning	psychodidae	0	0	0	0	14.9	35	full of sand
169	2	2024-10-01	40	tuesday	Luzernerring	2.60954e+06	1.26844e+06	functioning	undefined	0	0	0	0	14.9	35	full of sand
9	0	2024-10-01	40	tuesday	St. Johanns-Rheinweg	2.61088e+06	1.26843e+06	nonfunctioning						14.9	35	fell over
87	8	2024-10-01	40	tuesday	Am Krayenrain	2.61037e+06	1.26837e+06	functioning	aedes	0	0	0	0	14.9	35
87	8	2024-10-01	40	tuesday	Am Krayenrain	2.61037e+06	1.26837e+06	functioning	chironomidae	0	0	0	0	14.9	35
87	8	2024-10-01	40	tuesday	Am Krayenrain	2.61037e+06	1.26837e+06	functioning	culex	0	0	0	0	14.9	35
87	8	2024-10-01	40	tuesday	Am Krayenrain	2.61037e+06	1.26837e+06	functioning	psychodidae	0	0	0	0	14.9	35
87	8	2024-10-01	40	tuesday	Am Krayenrain	2.61037e+06	1.26837e+06	functioning	undefined	0	0	0	0	14.9	35
15	0	2024-10-01	40	tuesday	St. Johanns-Vorstadt	2.61084e+06	1.26834e+06	functioning	aedes	0	0	0	0	14.9	35
15	0	2024-10-01	40	tuesday	St. Johanns-Vorstadt	2.61084e+06	1.26834e+06	functioning	chironomidae	0	0	0	0	14.9	35
15	0	2024-10-01	40	tuesday	St. Johanns-Vorstadt	2.61084e+06	1.26834e+06	functioning	culex	0	0	0	0	14.9	35
15	0	2024-10-01	40	tuesday	St. Johanns-Vorstadt	2.61084e+06	1.26834e+06	functioning	psychodidae	0	0	0	0	14.9	35
15	0	2024-10-01	40	tuesday	St. Johanns-Vorstadt	2.61084e+06	1.26834e+06	functioning	undefined	0	0	0	0	14.9	35
57	8	2024-10-01	40	tuesday	Klingelbergstrasse	2.61051e+06	1.26823e+06	functioning	aedes	0	0	0	0	14.9	35
57	8	2024-10-01	40	tuesday	Klingelbergstrasse	2.61051e+06	1.26823e+06	functioning	chironomidae	0	0	0	0	14.9	35
57	8	2024-10-01	40	tuesday	Klingelbergstrasse	2.61051e+06	1.26823e+06	functioning	culex	0	0	0	0	14.9	35
57	8	2024-10-01	40	tuesday	Klingelbergstrasse	2.61051e+06	1.26823e+06	functioning	psychodidae	0	0	0	0	14.9	35
57	8	2024-10-01	40	tuesday	Klingelbergstrasse	2.61051e+06	1.26823e+06	functioning	undefined	0	0	0	0	14.9	35
74	0	2024-10-01	40	tuesday	Hebelstrasse	2.61041e+06	1.26812e+06	functioning	aedes	0	0	0	0	14.9	35
74	0	2024-10-01	40	tuesday	Hebelstrasse	2.61041e+06	1.26812e+06	functioning	chironomidae	0	0	0	0	14.9	35
74	0	2024-10-01	40	tuesday	Hebelstrasse	2.61041e+06	1.26812e+06	functioning	culex	0	0	0	0	14.9	35
74	0	2024-10-01	40	tuesday	Hebelstrasse	2.61041e+06	1.26812e+06	functioning	psychodidae	0	0	0	0	14.9	35
74	0	2024-10-01	40	tuesday	Hebelstrasse	2.61041e+06	1.26812e+06	functioning	undefined	0	0	0	0	14.9	35
80	0	2024-10-01	40	tuesday	St. Johanns-Ring	2.6104e+06	1.26811e+06	functioning	undefined	5	0	5	5	14.9	35
80	0	2024-10-01	40	tuesday	St. Johanns-Ring	2.6104e+06	1.26811e+06	functioning	chironomidae	2	1	0	2	14.9	35
80	0	2024-10-01	40	tuesday	St. Johanns-Ring	2.6104e+06	1.26811e+06	functioning	psychodidae	1	0	1	1	14.9	35
80	0	2024-10-01	40	tuesday	St. Johanns-Ring	2.6104e+06	1.26811e+06	functioning	aedes	0	0	0	0	14.9	35
80	0	2024-10-01	40	tuesday	St. Johanns-Ring	2.6104e+06	1.26811e+06	functioning	culex	0	0	0	0	14.9	35
37	8	2024-10-01	40	tuesday	Klingelbergstrasse	2.61066e+06	1.26804e+06	functioning	chironomidae	2	2	0	2	14.9	35
37	8	2024-10-01	40	tuesday	Klingelbergstrasse	2.61066e+06	1.26804e+06	functioning	aedes	0	0	0	0	14.9	35
37	8	2024-10-01	40	tuesday	Klingelbergstrasse	2.61066e+06	1.26804e+06	functioning	culex	0	0	0	0	14.9	35
37	8	2024-10-01	40	tuesday	Klingelbergstrasse	2.61066e+06	1.26804e+06	functioning	psychodidae	0	0	0	0	14.9	35
37	8	2024-10-01	40	tuesday	Klingelbergstrasse	2.61066e+06	1.26804e+06	functioning	undefined	0	0	0	0	14.9	35
123	0	2024-10-08	41	tuesday	Elsässerstrasse	2.61007e+06	1.26953e+06	nonfunctioning						15	15	fell over
120	8	2024-10-08	41	tuesday	Kohlenstrasse	2.61013e+06	1.26949e+06	functioning	aedes	0	0	0	0	15	15
120	8	2024-10-08	41	tuesday	Kohlenstrasse	2.61013e+06	1.26949e+06	functioning	chironomidae	0	0	0	0	15	15
120	8	2024-10-08	41	tuesday	Kohlenstrasse	2.61013e+06	1.26949e+06	functioning	culex	0	0	0	0	15	15
120	8	2024-10-08	41	tuesday	Kohlenstrasse	2.61013e+06	1.26949e+06	functioning	psychodidae	0	0	0	0	15	15
120	8	2024-10-08	41	tuesday	Kohlenstrasse	2.61013e+06	1.26949e+06	functioning	undefined	0	0	0	0	15	15
134	2	2024-10-08	41	tuesday	Lysbüchelstrasse	2.60999e+06	1.26944e+06	functioning	aedes	0	0	0	0	15	15
134	2	2024-10-08	41	tuesday	Lysbüchelstrasse	2.60999e+06	1.26944e+06	functioning	chironomidae	0	0	0	0	15	15
134	2	2024-10-08	41	tuesday	Lysbüchelstrasse	2.60999e+06	1.26944e+06	functioning	culex	0	0	0	0	15	15
134	2	2024-10-08	41	tuesday	Lysbüchelstrasse	2.60999e+06	1.26944e+06	functioning	psychodidae	0	0	0	0	15	15
134	2	2024-10-08	41	tuesday	Lysbüchelstrasse	2.60999e+06	1.26944e+06	functioning	undefined	0	0	0	0	15	15
129	8	2024-10-08	41	tuesday	Lysbüchelstrasse	2.61001e+06	1.26941e+06	nonfunctioning						15	15	Construction site closed
147	4	2024-10-08	41	tuesday	Hagenaustrasse	2.60982e+06	1.26927e+06	functioning	aedes	0	0	0	0	15	15
147	4	2024-10-08	41	tuesday	Hagenaustrasse	2.60982e+06	1.26927e+06	functioning	chironomidae	0	0	0	0	15	15
147	4	2024-10-08	41	tuesday	Hagenaustrasse	2.60982e+06	1.26927e+06	functioning	culex	0	0	0	0	15	15
147	4	2024-10-08	41	tuesday	Hagenaustrasse	2.60982e+06	1.26927e+06	functioning	psychodidae	0	0	0	0	15	15
147	4	2024-10-08	41	tuesday	Hagenaustrasse	2.60982e+06	1.26927e+06	functioning	undefined	0	0	0	0	15	15
121	8	2024-10-08	41	tuesday	Lysbüchelstrasse	2.6101e+06	1.26923e+06	nonfunctioning						15	15	fell over
156	8	2024-10-08	41	tuesday	Hagenaustrasse	2.60977e+06	1.26919e+06	functioning	psychodidae	1	0	1	1	15	15
156	8	2024-10-08	41	tuesday	Hagenaustrasse	2.60977e+06	1.26919e+06	functioning	aedes	0	0	0	0	15	15
156	8	2024-10-08	41	tuesday	Hagenaustrasse	2.60977e+06	1.26919e+06	functioning	chironomidae	0	0	0	0	15	15
156	8	2024-10-08	41	tuesday	Hagenaustrasse	2.60977e+06	1.26919e+06	functioning	culex	0	0	0	0	15	15
156	8	2024-10-08	41	tuesday	Hagenaustrasse	2.60977e+06	1.26919e+06	functioning	undefined	0	0	0	0	15	15
159	0	2024-10-08	41	tuesday	Hagenaustrasse	2.60976e+06	1.26918e+06	functioning	culex	3	2	0	3	15	15
159	0	2024-10-08	41	tuesday	Hagenaustrasse	2.60976e+06	1.26918e+06	functioning	aedes	0	0	0	0	15	15
159	0	2024-10-08	41	tuesday	Hagenaustrasse	2.60976e+06	1.26918e+06	functioning	chironomidae	0	0	0	0	15	15
159	0	2024-10-08	41	tuesday	Hagenaustrasse	2.60976e+06	1.26918e+06	functioning	psychodidae	0	0	0	0	15	15
159	0	2024-10-08	41	tuesday	Hagenaustrasse	2.60976e+06	1.26918e+06	functioning	undefined	0	0	0	0	15	15
157	4	2024-10-08	41	tuesday	Hagenaustrasse	2.60977e+06	1.26916e+06	functioning	aedes	0	0	0	0	15	15
157	4	2024-10-08	41	tuesday	Hagenaustrasse	2.60977e+06	1.26916e+06	functioning	chironomidae	0	0	0	0	15	15
157	4	2024-10-08	41	tuesday	Hagenaustrasse	2.60977e+06	1.26916e+06	functioning	culex	0	0	0	0	15	15
157	4	2024-10-08	41	tuesday	Hagenaustrasse	2.60977e+06	1.26916e+06	functioning	psychodidae	0	0	0	0	15	15
157	4	2024-10-08	41	tuesday	Hagenaustrasse	2.60977e+06	1.26916e+06	functioning	undefined	0	0	0	0	15	15
73	2	2024-10-08	41	tuesday	Kraftstrasse	2.61042e+06	1.26915e+06	functioning	aedes	0	0	0	0	15	15
73	2	2024-10-08	41	tuesday	Kraftstrasse	2.61042e+06	1.26915e+06	functioning	chironomidae	0	0	0	0	15	15
73	2	2024-10-08	41	tuesday	Kraftstrasse	2.61042e+06	1.26915e+06	functioning	culex	0	0	0	0	15	15
73	2	2024-10-08	41	tuesday	Kraftstrasse	2.61042e+06	1.26915e+06	functioning	psychodidae	0	0	0	0	15	15
73	2	2024-10-08	41	tuesday	Kraftstrasse	2.61042e+06	1.26915e+06	functioning	undefined	0	0	0	0	15	15
128	8	2024-10-08	41	tuesday	Lysbüchelstrasse	2.61002e+06	1.26915e+06	functioning	aedes	0	0	0	0	15	15
128	8	2024-10-08	41	tuesday	Lysbüchelstrasse	2.61002e+06	1.26915e+06	functioning	chironomidae	0	0	0	0	15	15
128	8	2024-10-08	41	tuesday	Lysbüchelstrasse	2.61002e+06	1.26915e+06	functioning	culex	0	0	0	0	15	15
128	8	2024-10-08	41	tuesday	Lysbüchelstrasse	2.61002e+06	1.26915e+06	functioning	psychodidae	0	0	0	0	15	15
128	8	2024-10-08	41	tuesday	Lysbüchelstrasse	2.61002e+06	1.26915e+06	functioning	undefined	0	0	0	0	15	15
178	8	2024-10-08	41	tuesday	Friedrich Miescher-Strasse	2.60934e+06	1.2691e+06	functioning	aedes	0	0	0	0	15	15
178	8	2024-10-08	41	tuesday	Friedrich Miescher-Strasse	2.60934e+06	1.2691e+06	functioning	chironomidae	0	0	0	0	15	15
178	8	2024-10-08	41	tuesday	Friedrich Miescher-Strasse	2.60934e+06	1.2691e+06	functioning	culex	0	0	0	0	15	15
178	8	2024-10-08	41	tuesday	Friedrich Miescher-Strasse	2.60934e+06	1.2691e+06	functioning	psychodidae	0	0	0	0	15	15
178	8	2024-10-08	41	tuesday	Friedrich Miescher-Strasse	2.60934e+06	1.2691e+06	functioning	undefined	0	0	0	0	15	15
180	4	2024-10-08	41	tuesday	Friedrich Miescher-Strasse	2.6093e+06	1.26907e+06	functioning	aedes	0	0	0	0	15	15
180	4	2024-10-08	41	tuesday	Friedrich Miescher-Strasse	2.6093e+06	1.26907e+06	functioning	chironomidae	0	0	0	0	15	15
180	4	2024-10-08	41	tuesday	Friedrich Miescher-Strasse	2.6093e+06	1.26907e+06	functioning	culex	0	0	0	0	15	15
180	4	2024-10-08	41	tuesday	Friedrich Miescher-Strasse	2.6093e+06	1.26907e+06	functioning	psychodidae	0	0	0	0	15	15
180	4	2024-10-08	41	tuesday	Friedrich Miescher-Strasse	2.6093e+06	1.26907e+06	functioning	undefined	0	0	0	0	15	15
155	4	2024-10-08	41	tuesday	Neudorfstrasse	2.60977e+06	1.26906e+06	functioning	chironomidae	1	1	0	1	15	15
155	4	2024-10-08	41	tuesday	Neudorfstrasse	2.60977e+06	1.26906e+06	functioning	aedes	0	0	0	0	15	15
155	4	2024-10-08	41	tuesday	Neudorfstrasse	2.60977e+06	1.26906e+06	functioning	culex	0	0	0	0	15	15
155	4	2024-10-08	41	tuesday	Neudorfstrasse	2.60977e+06	1.26906e+06	functioning	psychodidae	0	0	0	0	15	15
155	4	2024-10-08	41	tuesday	Neudorfstrasse	2.60977e+06	1.26906e+06	functioning	undefined	0	0	0	0	15	15
12	6	2024-10-08	41	tuesday	Mülhauserstrasse	2.61087e+06	1.26886e+06	functioning	aedes	0	0	0	0	15	15
12	6	2024-10-08	41	tuesday	Mülhauserstrasse	2.61087e+06	1.26886e+06	functioning	chironomidae	0	0	0	0	15	15
12	6	2024-10-08	41	tuesday	Mülhauserstrasse	2.61087e+06	1.26886e+06	functioning	culex	0	0	0	0	15	15
12	6	2024-10-08	41	tuesday	Mülhauserstrasse	2.61087e+06	1.26886e+06	functioning	psychodidae	0	0	0	0	15	15
12	6	2024-10-08	41	tuesday	Mülhauserstrasse	2.61087e+06	1.26886e+06	functioning	undefined	0	0	0	0	15	15
138	2	2024-10-08	41	tuesday	Wasensträsschen	2.60989e+06	1.26886e+06	functioning	chironomidae	1	0	1	1	15	15
138	2	2024-10-08	41	tuesday	Wasensträsschen	2.60989e+06	1.26886e+06	functioning	aedes	0	0	0	0	15	15
138	2	2024-10-08	41	tuesday	Wasensträsschen	2.60989e+06	1.26886e+06	functioning	culex	0	0	0	0	15	15
138	2	2024-10-08	41	tuesday	Wasensträsschen	2.60989e+06	1.26886e+06	functioning	psychodidae	0	0	0	0	15	15
138	2	2024-10-08	41	tuesday	Wasensträsschen	2.60989e+06	1.26886e+06	functioning	undefined	0	0	0	0	15	15
13	4	2024-10-08	41	tuesday	Mülhauserstrasse	2.61087e+06	1.26884e+06	nonfunctioning						15	15	fell over
68	2	2024-10-08	41	tuesday	Wattstrasse	2.61045e+06	1.26883e+06	functioning	aedes	0	0	0	0	15	15
68	2	2024-10-08	41	tuesday	Wattstrasse	2.61045e+06	1.26883e+06	functioning	chironomidae	0	0	0	0	15	15
68	2	2024-10-08	41	tuesday	Wattstrasse	2.61045e+06	1.26883e+06	functioning	culex	0	0	0	0	15	15
68	2	2024-10-08	41	tuesday	Wattstrasse	2.61045e+06	1.26883e+06	functioning	psychodidae	0	0	0	0	15	15
68	2	2024-10-08	41	tuesday	Wattstrasse	2.61045e+06	1.26883e+06	functioning	undefined	0	0	0	0	15	15
55	6	2024-10-08	41	tuesday	Murbacherstrasse	2.61051e+06	1.26879e+06	functioning	chironomidae	1	0	0	1	15	15
55	6	2024-10-08	41	tuesday	Murbacherstrasse	2.61051e+06	1.26879e+06	functioning	aedes	0	0	0	0	15	15
55	6	2024-10-08	41	tuesday	Murbacherstrasse	2.61051e+06	1.26879e+06	functioning	culex	0	0	0	0	15	15
55	6	2024-10-08	41	tuesday	Murbacherstrasse	2.61051e+06	1.26879e+06	functioning	psychodidae	0	0	0	0	15	15
55	6	2024-10-08	41	tuesday	Murbacherstrasse	2.61051e+06	1.26879e+06	functioning	undefined	0	0	0	0	15	15
20	10	2024-10-08	41	tuesday	Mülhauserstrasse	2.61078e+06	1.26876e+06	nonfunctioning						15	15	fell over
168	8	2024-10-08	41	tuesday	Gustav Wenk-Strasse	2.60964e+06	1.26871e+06	functioning	aedes	0	0	0	0	15	15
168	8	2024-10-08	41	tuesday	Gustav Wenk-Strasse	2.60964e+06	1.26871e+06	functioning	chironomidae	0	0	0	0	15	15
168	8	2024-10-08	41	tuesday	Gustav Wenk-Strasse	2.60964e+06	1.26871e+06	functioning	culex	0	0	0	0	15	15
168	8	2024-10-08	41	tuesday	Gustav Wenk-Strasse	2.60964e+06	1.26871e+06	functioning	psychodidae	0	0	0	0	15	15
168	8	2024-10-08	41	tuesday	Gustav Wenk-Strasse	2.60964e+06	1.26871e+06	functioning	undefined	0	0	0	0	15	15
76	4	2024-10-08	41	tuesday	Lothringerstrasse	2.61041e+06	1.26869e+06	functioning	aedes	0	0	0	0	15	15
76	4	2024-10-08	41	tuesday	Lothringerstrasse	2.61041e+06	1.26869e+06	functioning	chironomidae	0	0	0	0	15	15
76	4	2024-10-08	41	tuesday	Lothringerstrasse	2.61041e+06	1.26869e+06	functioning	culex	0	0	0	0	15	15
76	4	2024-10-08	41	tuesday	Lothringerstrasse	2.61041e+06	1.26869e+06	functioning	psychodidae	0	0	0	0	15	15
76	4	2024-10-08	41	tuesday	Lothringerstrasse	2.61041e+06	1.26869e+06	functioning	undefined	0	0	0	0	15	15
78	8	2024-10-08	41	tuesday	Lothringerstrasse	2.61041e+06	1.26869e+06	functioning	aedes	0	0	0	0	15	15
78	8	2024-10-08	41	tuesday	Lothringerstrasse	2.61041e+06	1.26869e+06	functioning	chironomidae	0	0	0	0	15	15
78	8	2024-10-08	41	tuesday	Lothringerstrasse	2.61041e+06	1.26869e+06	functioning	culex	0	0	0	0	15	15
78	8	2024-10-08	41	tuesday	Lothringerstrasse	2.61041e+06	1.26869e+06	functioning	psychodidae	0	0	0	0	15	15
78	8	2024-10-08	41	tuesday	Lothringerstrasse	2.61041e+06	1.26869e+06	functioning	undefined	0	0	0	0	15	15
34	10	2024-10-08	41	tuesday	Mülhauserstrasse	2.61067e+06	1.26867e+06	functioning	aedes	0	0	0	0	15	15
34	10	2024-10-08	41	tuesday	Mülhauserstrasse	2.61067e+06	1.26867e+06	functioning	chironomidae	0	0	0	0	15	15
34	10	2024-10-08	41	tuesday	Mülhauserstrasse	2.61067e+06	1.26867e+06	functioning	culex	0	0	0	0	15	15
34	10	2024-10-08	41	tuesday	Mülhauserstrasse	2.61067e+06	1.26867e+06	functioning	psychodidae	0	0	0	0	15	15
34	10	2024-10-08	41	tuesday	Mülhauserstrasse	2.61067e+06	1.26867e+06	functioning	undefined	0	0	0	0	15	15
18	6	2024-10-08	41	tuesday	Elsässerrheinweg	2.61083e+06	1.26866e+06	functioning	aedes	0	0	0	0	15	15
18	6	2024-10-08	41	tuesday	Elsässerrheinweg	2.61083e+06	1.26866e+06	functioning	chironomidae	0	0	0	0	15	15
18	6	2024-10-08	41	tuesday	Elsässerrheinweg	2.61083e+06	1.26866e+06	functioning	culex	0	0	0	0	15	15
18	6	2024-10-08	41	tuesday	Elsässerrheinweg	2.61083e+06	1.26866e+06	functioning	psychodidae	0	0	0	0	15	15
18	6	2024-10-08	41	tuesday	Elsässerrheinweg	2.61083e+06	1.26866e+06	functioning	undefined	0	0	0	0	15	15
69	8	2024-10-08	41	tuesday	Lothringerstrasse	2.61044e+06	1.26863e+06	functioning	psychodidae	15	0	15	15	15	15
69	8	2024-10-08	41	tuesday	Lothringerstrasse	2.61044e+06	1.26863e+06	functioning	chironomidae	1	1	0	1	15	15
69	8	2024-10-08	41	tuesday	Lothringerstrasse	2.61044e+06	1.26863e+06	functioning	aedes	0	0	0	0	15	15
69	8	2024-10-08	41	tuesday	Lothringerstrasse	2.61044e+06	1.26863e+06	functioning	culex	0	0	0	0	15	15
69	8	2024-10-08	41	tuesday	Lothringerstrasse	2.61044e+06	1.26863e+06	functioning	undefined	0	0	0	0	15	15
95	10	2024-10-08	41	tuesday	Vogesenstrasse	2.61033e+06	1.26862e+06	functioning	aedes	0	0	0	0	15	15
95	10	2024-10-08	41	tuesday	Vogesenstrasse	2.61033e+06	1.26862e+06	functioning	chironomidae	0	0	0	0	15	15
95	10	2024-10-08	41	tuesday	Vogesenstrasse	2.61033e+06	1.26862e+06	functioning	culex	0	0	0	0	15	15
95	10	2024-10-08	41	tuesday	Vogesenstrasse	2.61033e+06	1.26862e+06	functioning	psychodidae	0	0	0	0	15	15
95	10	2024-10-08	41	tuesday	Vogesenstrasse	2.61033e+06	1.26862e+06	functioning	undefined	0	0	0	0	15	15
132	6	2024-10-08	41	tuesday	Lenzgasse	2.61001e+06	1.26861e+06	functioning	aedes	0	0	0	0	15	15
132	6	2024-10-08	41	tuesday	Lenzgasse	2.61001e+06	1.26861e+06	functioning	chironomidae	0	0	0	0	15	15
132	6	2024-10-08	41	tuesday	Lenzgasse	2.61001e+06	1.26861e+06	functioning	culex	0	0	0	0	15	15
132	6	2024-10-08	41	tuesday	Lenzgasse	2.61001e+06	1.26861e+06	functioning	psychodidae	0	0	0	0	15	15
132	6	2024-10-08	41	tuesday	Lenzgasse	2.61001e+06	1.26861e+06	functioning	undefined	0	0	0	0	15	15
165	0	2024-10-08	41	tuesday	Luzernerring	2.60967e+06	1.26861e+06	functioning	aedes	0	0	0	0	15	15
165	0	2024-10-08	41	tuesday	Luzernerring	2.60967e+06	1.26861e+06	functioning	chironomidae	0	0	0	0	15	15
165	0	2024-10-08	41	tuesday	Luzernerring	2.60967e+06	1.26861e+06	functioning	culex	0	0	0	0	15	15
165	0	2024-10-08	41	tuesday	Luzernerring	2.60967e+06	1.26861e+06	functioning	psychodidae	0	0	0	0	15	15
165	0	2024-10-08	41	tuesday	Luzernerring	2.60967e+06	1.26861e+06	functioning	undefined	0	0	0	0	15	15
43	10	2024-10-08	41	tuesday	Jungstrasse	2.61063e+06	1.26856e+06	functioning	aedes	0	0	0	0	15	15
43	10	2024-10-08	41	tuesday	Jungstrasse	2.61063e+06	1.26856e+06	functioning	chironomidae	0	0	0	0	15	15
43	10	2024-10-08	41	tuesday	Jungstrasse	2.61063e+06	1.26856e+06	functioning	culex	0	0	0	0	15	15
43	10	2024-10-08	41	tuesday	Jungstrasse	2.61063e+06	1.26856e+06	functioning	psychodidae	0	0	0	0	15	15
43	10	2024-10-08	41	tuesday	Jungstrasse	2.61063e+06	1.26856e+06	functioning	undefined	0	0	0	0	15	15
110	4	2024-10-08	41	tuesday	Im Davidsboden	2.61024e+06	1.26856e+06	functioning	aedes	0	0	0	0	15	15
110	4	2024-10-08	41	tuesday	Im Davidsboden	2.61024e+06	1.26856e+06	functioning	chironomidae	0	0	0	0	15	15
110	4	2024-10-08	41	tuesday	Im Davidsboden	2.61024e+06	1.26856e+06	functioning	culex	0	0	0	0	15	15
110	4	2024-10-08	41	tuesday	Im Davidsboden	2.61024e+06	1.26856e+06	functioning	psychodidae	0	0	0	0	15	15
110	4	2024-10-08	41	tuesday	Im Davidsboden	2.61024e+06	1.26856e+06	functioning	undefined	0	0	0	0	15	15
79	6	2024-10-08	41	tuesday	Vogesenstrasse	2.6104e+06	1.26854e+06	functioning	aedes	0	0	0	0	15	15
79	6	2024-10-08	41	tuesday	Vogesenstrasse	2.6104e+06	1.26854e+06	functioning	chironomidae	0	0	0	0	15	15
79	6	2024-10-08	41	tuesday	Vogesenstrasse	2.6104e+06	1.26854e+06	functioning	culex	0	0	0	0	15	15
79	6	2024-10-08	41	tuesday	Vogesenstrasse	2.6104e+06	1.26854e+06	functioning	psychodidae	0	0	0	0	15	15
79	6	2024-10-08	41	tuesday	Vogesenstrasse	2.6104e+06	1.26854e+06	functioning	undefined	0	0	0	0	15	15
158	10	2024-10-08	41	tuesday	Largitzenstrasse	2.60977e+06	1.26851e+06	functioning	aedes	0	0	0	0	15	15
158	10	2024-10-08	41	tuesday	Largitzenstrasse	2.60977e+06	1.26851e+06	functioning	chironomidae	0	0	0	0	15	15
158	10	2024-10-08	41	tuesday	Largitzenstrasse	2.60977e+06	1.26851e+06	functioning	culex	0	0	0	0	15	15
158	10	2024-10-08	41	tuesday	Largitzenstrasse	2.60977e+06	1.26851e+06	functioning	psychodidae	0	0	0	0	15	15
158	10	2024-10-08	41	tuesday	Largitzenstrasse	2.60977e+06	1.26851e+06	functioning	undefined	0	0	0	0	15	15
60	6	2024-10-08	41	tuesday	Jungstrasse	2.6105e+06	1.26848e+06	functioning	aedes	0	0	0	0	15	15
60	6	2024-10-08	41	tuesday	Jungstrasse	2.6105e+06	1.26848e+06	functioning	chironomidae	0	0	0	0	15	15
60	6	2024-10-08	41	tuesday	Jungstrasse	2.6105e+06	1.26848e+06	functioning	culex	0	0	0	0	15	15
60	6	2024-10-08	41	tuesday	Jungstrasse	2.6105e+06	1.26848e+06	functioning	psychodidae	0	0	0	0	15	15
60	6	2024-10-08	41	tuesday	Jungstrasse	2.6105e+06	1.26848e+06	functioning	undefined	0	0	0	0	15	15
49	2	2024-10-08	41	tuesday	Lothringerstrasse	2.61058e+06	1.26844e+06	functioning	aedes	0	0	0	0	15	15
49	2	2024-10-08	41	tuesday	Lothringerstrasse	2.61058e+06	1.26844e+06	functioning	chironomidae	0	0	0	0	15	15
49	2	2024-10-08	41	tuesday	Lothringerstrasse	2.61058e+06	1.26844e+06	functioning	culex	0	0	0	0	15	15
49	2	2024-10-08	41	tuesday	Lothringerstrasse	2.61058e+06	1.26844e+06	functioning	psychodidae	0	0	0	0	15	15
49	2	2024-10-08	41	tuesday	Lothringerstrasse	2.61058e+06	1.26844e+06	functioning	undefined	0	0	0	0	15	15
169	2	2024-10-08	41	tuesday	Luzernerring	2.60954e+06	1.26844e+06	functioning	aedes	0	0	0	0	15	15
169	2	2024-10-08	41	tuesday	Luzernerring	2.60954e+06	1.26844e+06	functioning	chironomidae	0	0	0	0	15	15
169	2	2024-10-08	41	tuesday	Luzernerring	2.60954e+06	1.26844e+06	functioning	culex	0	0	0	0	15	15
169	2	2024-10-08	41	tuesday	Luzernerring	2.60954e+06	1.26844e+06	functioning	psychodidae	0	0	0	0	15	15
169	2	2024-10-08	41	tuesday	Luzernerring	2.60954e+06	1.26844e+06	functioning	undefined	0	0	0	0	15	15
9	0	2024-10-08	41	tuesday	St. Johanns-Rheinweg	2.61088e+06	1.26843e+06	nonfunctioning						15	15	fell over
87	8	2024-10-08	41	tuesday	Am Krayenrain	2.61037e+06	1.26837e+06	functioning	aedes	0	0	0	0	15	15
87	8	2024-10-08	41	tuesday	Am Krayenrain	2.61037e+06	1.26837e+06	functioning	chironomidae	0	0	0	0	15	15
87	8	2024-10-08	41	tuesday	Am Krayenrain	2.61037e+06	1.26837e+06	functioning	culex	0	0	0	0	15	15
87	8	2024-10-08	41	tuesday	Am Krayenrain	2.61037e+06	1.26837e+06	functioning	psychodidae	0	0	0	0	15	15
87	8	2024-10-08	41	tuesday	Am Krayenrain	2.61037e+06	1.26837e+06	functioning	undefined	0	0	0	0	15	15
15	0	2024-10-08	41	tuesday	St. Johanns-Vorstadt	2.61084e+06	1.26834e+06	functioning	aedes	0	0	0	0	15	15
15	0	2024-10-08	41	tuesday	St. Johanns-Vorstadt	2.61084e+06	1.26834e+06	functioning	chironomidae	0	0	0	0	15	15
15	0	2024-10-08	41	tuesday	St. Johanns-Vorstadt	2.61084e+06	1.26834e+06	functioning	culex	0	0	0	0	15	15
15	0	2024-10-08	41	tuesday	St. Johanns-Vorstadt	2.61084e+06	1.26834e+06	functioning	psychodidae	0	0	0	0	15	15
15	0	2024-10-08	41	tuesday	St. Johanns-Vorstadt	2.61084e+06	1.26834e+06	functioning	undefined	0	0	0	0	15	15
57	8	2024-10-08	41	tuesday	Klingelbergstrasse	2.61051e+06	1.26823e+06	functioning	aedes	0	0	0	0	15	15
57	8	2024-10-08	41	tuesday	Klingelbergstrasse	2.61051e+06	1.26823e+06	functioning	chironomidae	0	0	0	0	15	15
57	8	2024-10-08	41	tuesday	Klingelbergstrasse	2.61051e+06	1.26823e+06	functioning	culex	0	0	0	0	15	15
57	8	2024-10-08	41	tuesday	Klingelbergstrasse	2.61051e+06	1.26823e+06	functioning	psychodidae	0	0	0	0	15	15
57	8	2024-10-08	41	tuesday	Klingelbergstrasse	2.61051e+06	1.26823e+06	functioning	undefined	0	0	0	0	15	15
74	0	2024-10-08	41	tuesday	Hebelstrasse	2.61041e+06	1.26812e+06	functioning	aedes	0	0	0	0	15	15
74	0	2024-10-08	41	tuesday	Hebelstrasse	2.61041e+06	1.26812e+06	functioning	chironomidae	0	0	0	0	15	15
74	0	2024-10-08	41	tuesday	Hebelstrasse	2.61041e+06	1.26812e+06	functioning	culex	0	0	0	0	15	15
74	0	2024-10-08	41	tuesday	Hebelstrasse	2.61041e+06	1.26812e+06	functioning	psychodidae	0	0	0	0	15	15
74	0	2024-10-08	41	tuesday	Hebelstrasse	2.61041e+06	1.26812e+06	functioning	undefined	0	0	0	0	15	15
80	0	2024-10-08	41	tuesday	St. Johanns-Ring	2.6104e+06	1.26811e+06	functioning	aedes	0	0	0	0	15	15
80	0	2024-10-08	41	tuesday	St. Johanns-Ring	2.6104e+06	1.26811e+06	functioning	chironomidae	0	0	0	0	15	15
80	0	2024-10-08	41	tuesday	St. Johanns-Ring	2.6104e+06	1.26811e+06	functioning	culex	0	0	0	0	15	15
80	0	2024-10-08	41	tuesday	St. Johanns-Ring	2.6104e+06	1.26811e+06	functioning	psychodidae	0	0	0	0	15	15
80	0	2024-10-08	41	tuesday	St. Johanns-Ring	2.6104e+06	1.26811e+06	functioning	undefined	0	0	0	0	15	15
37	8	2024-10-08	41	tuesday	Klingelbergstrasse	2.61066e+06	1.26804e+06	functioning	aedes	0	0	0	0	15	15
37	8	2024-10-08	41	tuesday	Klingelbergstrasse	2.61066e+06	1.26804e+06	functioning	chironomidae	0	0	0	0	15	15
37	8	2024-10-08	41	tuesday	Klingelbergstrasse	2.61066e+06	1.26804e+06	functioning	culex	0	0	0	0	15	15
37	8	2024-10-08	41	tuesday	Klingelbergstrasse	2.61066e+06	1.26804e+06	functioning	psychodidae	0	0	0	0	15	15
37	8	2024-10-08	41	tuesday	Klingelbergstrasse	2.61066e+06	1.26804e+06	functioning	undefined	0	0	0	0	15	15
127	10	2024-09-11	37	wednesday	Elsässerstrasse	2.61005e+06	1.26957e+06	functioning	culex	2	0	0	2	14.3	13.5
127	10	2024-09-11	37	wednesday	Elsässerstrasse	2.61005e+06	1.26957e+06	functioning	aedes	1	0	0	1	14.3	13.5
127	10	2024-09-11	37	wednesday	Elsässerstrasse	2.61005e+06	1.26957e+06	functioning	chironomidae	0	0	0	0	14.3	13.5
127	10	2024-09-11	37	wednesday	Elsässerstrasse	2.61005e+06	1.26957e+06	functioning	psychodidae	0	0	0	0	14.3	13.5
127	10	2024-09-11	37	wednesday	Elsässerstrasse	2.61005e+06	1.26957e+06	functioning	undefined	0	0	0	0	14.3	13.5
131	2	2024-09-11	37	wednesday	Schlachthofstrasse	2.61001e+06	1.26952e+06	functioning	aedes	0	0	0	0	14.3	13.5
131	2	2024-09-11	37	wednesday	Schlachthofstrasse	2.61001e+06	1.26952e+06	functioning	chironomidae	0	0	0	0	14.3	13.5
131	2	2024-09-11	37	wednesday	Schlachthofstrasse	2.61001e+06	1.26952e+06	functioning	culex	0	0	0	0	14.3	13.5
131	2	2024-09-11	37	wednesday	Schlachthofstrasse	2.61001e+06	1.26952e+06	functioning	psychodidae	0	0	0	0	14.3	13.5
131	2	2024-09-11	37	wednesday	Schlachthofstrasse	2.61001e+06	1.26952e+06	functioning	undefined	0	0	0	0	14.3	13.5
124	10	2024-09-11	37	wednesday	Schlachthofstrasse	2.61007e+06	1.2695e+06	functioning	chironomidae	4	4	0	4	14.3	13.5
124	10	2024-09-11	37	wednesday	Schlachthofstrasse	2.61007e+06	1.2695e+06	functioning	aedes	1	1	0	1	14.3	13.5
124	10	2024-09-11	37	wednesday	Schlachthofstrasse	2.61007e+06	1.2695e+06	functioning	culex	1	1	0	1	14.3	13.5
124	10	2024-09-11	37	wednesday	Schlachthofstrasse	2.61007e+06	1.2695e+06	functioning	psychodidae	0	0	0	0	14.3	13.5
124	10	2024-09-11	37	wednesday	Schlachthofstrasse	2.61007e+06	1.2695e+06	functioning	undefined	0	0	0	0	14.3	13.5
135	4	2024-09-11	37	wednesday	Lysbüchelstrasse	2.60996e+06	1.26949e+06	functioning	aedes	0	0	0	0	14.3	13.5
135	4	2024-09-11	37	wednesday	Lysbüchelstrasse	2.60996e+06	1.26949e+06	functioning	chironomidae	0	0	0	0	14.3	13.5
135	4	2024-09-11	37	wednesday	Lysbüchelstrasse	2.60996e+06	1.26949e+06	functioning	culex	0	0	0	0	14.3	13.5
135	4	2024-09-11	37	wednesday	Lysbüchelstrasse	2.60996e+06	1.26949e+06	functioning	psychodidae	0	0	0	0	14.3	13.5
135	4	2024-09-11	37	wednesday	Lysbüchelstrasse	2.60996e+06	1.26949e+06	functioning	undefined	0	0	0	0	14.3	13.5
174	4	2024-09-11	37	wednesday	Schlachthofstrasse	2.60946e+06	1.26945e+06	functioning	aedes	0	0	0	0	14.3	13.5
174	4	2024-09-11	37	wednesday	Schlachthofstrasse	2.60946e+06	1.26945e+06	functioning	chironomidae	0	0	0	0	14.3	13.5
174	4	2024-09-11	37	wednesday	Schlachthofstrasse	2.60946e+06	1.26945e+06	functioning	culex	0	0	0	0	14.3	13.5
174	4	2024-09-11	37	wednesday	Schlachthofstrasse	2.60946e+06	1.26945e+06	functioning	psychodidae	0	0	0	0	14.3	13.5
174	4	2024-09-11	37	wednesday	Schlachthofstrasse	2.60946e+06	1.26945e+06	functioning	undefined	0	0	0	0	14.3	13.5
92	2	2024-09-11	37	wednesday	Kohlenstrasse	2.61035e+06	1.26943e+06	nonfunctioning						14.3	13.5	fell over
91	6	2024-09-11	37	wednesday	Kohlenstrasse	2.61035e+06	1.26942e+06	functioning	chironomidae	5	3	0	5	14.3	13.5
91	6	2024-09-11	37	wednesday	Kohlenstrasse	2.61035e+06	1.26942e+06	functioning	aedes	0	0	0	0	14.3	13.5
91	6	2024-09-11	37	wednesday	Kohlenstrasse	2.61035e+06	1.26942e+06	functioning	culex	0	0	0	0	14.3	13.5
91	6	2024-09-11	37	wednesday	Kohlenstrasse	2.61035e+06	1.26942e+06	functioning	psychodidae	0	0	0	0	14.3	13.5
91	6	2024-09-11	37	wednesday	Kohlenstrasse	2.61035e+06	1.26942e+06	functioning	undefined	0	0	0	0	14.3	13.5
177	10	2024-09-11	37	wednesday	Flughafenstrasse	2.60938e+06	1.26931e+06	functioning	aedes	0	0	0	0	14.3	13.5
177	10	2024-09-11	37	wednesday	Flughafenstrasse	2.60938e+06	1.26931e+06	functioning	chironomidae	0	0	0	0	14.3	13.5
177	10	2024-09-11	37	wednesday	Flughafenstrasse	2.60938e+06	1.26931e+06	functioning	culex	0	0	0	0	14.3	13.5
177	10	2024-09-11	37	wednesday	Flughafenstrasse	2.60938e+06	1.26931e+06	functioning	psychodidae	0	0	0	0	14.3	13.5
177	10	2024-09-11	37	wednesday	Flughafenstrasse	2.60938e+06	1.26931e+06	functioning	undefined	0	0	0	0	14.3	13.5
122	8	2024-09-11	37	wednesday	Lysbüchelstrasse	2.61008e+06	1.26928e+06	functioning	aedes	0	0	0	0	14.3	13.5
122	8	2024-09-11	37	wednesday	Lysbüchelstrasse	2.61008e+06	1.26928e+06	functioning	chironomidae	0	0	0	0	14.3	13.5
122	8	2024-09-11	37	wednesday	Lysbüchelstrasse	2.61008e+06	1.26928e+06	functioning	culex	0	0	0	0	14.3	13.5
122	8	2024-09-11	37	wednesday	Lysbüchelstrasse	2.61008e+06	1.26928e+06	functioning	psychodidae	0	0	0	0	14.3	13.5
122	8	2024-09-11	37	wednesday	Lysbüchelstrasse	2.61008e+06	1.26928e+06	functioning	undefined	0	0	0	0	14.3	13.5
152	8	2024-09-11	37	wednesday	Hagenaustrasse	2.6098e+06	1.2692e+06	nonfunctioning						14.3	13.5	fell over
125	0	2024-09-11	37	wednesday	Lysbüchelstrasse	2.61007e+06	1.26918e+06	functioning	aedes	0	0	0	0	14.3	13.5
125	0	2024-09-11	37	wednesday	Lysbüchelstrasse	2.61007e+06	1.26918e+06	functioning	chironomidae	0	0	0	0	14.3	13.5
125	0	2024-09-11	37	wednesday	Lysbüchelstrasse	2.61007e+06	1.26918e+06	functioning	culex	0	0	0	0	14.3	13.5
125	0	2024-09-11	37	wednesday	Lysbüchelstrasse	2.61007e+06	1.26918e+06	functioning	psychodidae	0	0	0	0	14.3	13.5
125	0	2024-09-11	37	wednesday	Lysbüchelstrasse	2.61007e+06	1.26918e+06	functioning	undefined	0	0	0	0	14.3	13.5
143	10	2024-09-11	37	wednesday	Hagenaustrasse	2.60985e+06	1.26914e+06	functioning	aedes	0	0	0	0	14.3	13.5
143	10	2024-09-11	37	wednesday	Hagenaustrasse	2.60985e+06	1.26914e+06	functioning	chironomidae	0	0	0	0	14.3	13.5
143	10	2024-09-11	37	wednesday	Hagenaustrasse	2.60985e+06	1.26914e+06	functioning	culex	0	0	0	0	14.3	13.5
143	10	2024-09-11	37	wednesday	Hagenaustrasse	2.60985e+06	1.26914e+06	functioning	psychodidae	0	0	0	0	14.3	13.5
143	10	2024-09-11	37	wednesday	Hagenaustrasse	2.60985e+06	1.26914e+06	functioning	undefined	0	0	0	0	14.3	13.5
179	6	2024-09-11	37	wednesday	Friedrich Miescher-Strasse	2.60934e+06	1.26911e+06	nonfunctioning						14.3	13.5	fell over/ catch basin covered in needles
141	0	2024-09-11	37	wednesday	Hagenaustrasse	2.60986e+06	1.26911e+06	functioning	culex	3	1	0	3	14.3	13.5
141	0	2024-09-11	37	wednesday	Hagenaustrasse	2.60986e+06	1.26911e+06	functioning	psychodidae	2	0	2	2	14.3	13.5
141	0	2024-09-11	37	wednesday	Hagenaustrasse	2.60986e+06	1.26911e+06	functioning	aedes	2	0	0	2	14.3	13.5
141	0	2024-09-11	37	wednesday	Hagenaustrasse	2.60986e+06	1.26911e+06	functioning	chironomidae	0	0	0	0	14.3	13.5
141	0	2024-09-11	37	wednesday	Hagenaustrasse	2.60986e+06	1.26911e+06	functioning	undefined	0	0	0	0	14.3	13.5
30	0	2024-09-11	37	wednesday	Fabrikstrasse	2.61071e+06	1.26894e+06	nonfunctioning						14.3	13.5	fell over
89	10	2024-09-11	37	wednesday	Lothringerstrasse	2.61037e+06	1.26876e+06	nonfunctioning						14.3	13.5	fell over
25	2	2024-09-11	37	wednesday	Mülhauserstrasse	2.61074e+06	1.26873e+06	functioning	aedes	0	0	0	0	14.3	13.5
25	2	2024-09-11	37	wednesday	Mülhauserstrasse	2.61074e+06	1.26873e+06	functioning	chironomidae	0	0	0	0	14.3	13.5
25	2	2024-09-11	37	wednesday	Mülhauserstrasse	2.61074e+06	1.26873e+06	functioning	culex	0	0	0	0	14.3	13.5
25	2	2024-09-11	37	wednesday	Mülhauserstrasse	2.61074e+06	1.26873e+06	functioning	psychodidae	0	0	0	0	14.3	13.5
25	2	2024-09-11	37	wednesday	Mülhauserstrasse	2.61074e+06	1.26873e+06	functioning	undefined	0	0	0	0	14.3	13.5
116	6	2024-09-11	37	wednesday	Entenweidstrasse	2.61016e+06	1.26871e+06	nonfunctioning						14.3	13.5	Lost
32	6	2024-09-11	37	wednesday	Mülhauserstrasse	2.6107e+06	1.26868e+06	functioning	aedes	0	0	0	0	14.3	13.5
32	6	2024-09-11	37	wednesday	Mülhauserstrasse	2.6107e+06	1.26868e+06	functioning	chironomidae	0	0	0	0	14.3	13.5
32	6	2024-09-11	37	wednesday	Mülhauserstrasse	2.6107e+06	1.26868e+06	functioning	culex	0	0	0	0	14.3	13.5
32	6	2024-09-11	37	wednesday	Mülhauserstrasse	2.6107e+06	1.26868e+06	functioning	psychodidae	0	0	0	0	14.3	13.5
32	6	2024-09-11	37	wednesday	Mülhauserstrasse	2.6107e+06	1.26868e+06	functioning	undefined	0	0	0	0	14.3	13.5
98	6	2024-09-11	37	wednesday	Vogesenstrasse	2.61032e+06	1.26864e+06	functioning	aedes	0	0	0	0	14.3	13.5
98	6	2024-09-11	37	wednesday	Vogesenstrasse	2.61032e+06	1.26864e+06	functioning	chironomidae	0	0	0	0	14.3	13.5
98	6	2024-09-11	37	wednesday	Vogesenstrasse	2.61032e+06	1.26864e+06	functioning	culex	0	0	0	0	14.3	13.5
98	6	2024-09-11	37	wednesday	Vogesenstrasse	2.61032e+06	1.26864e+06	functioning	psychodidae	0	0	0	0	14.3	13.5
98	6	2024-09-11	37	wednesday	Vogesenstrasse	2.61032e+06	1.26864e+06	functioning	undefined	0	0	0	0	14.3	13.5
115	6	2024-09-11	37	wednesday	Entenweidstrasse	2.61017e+06	1.26863e+06	functioning	chironomidae	1	1	0	1	14.3	13.5
115	6	2024-09-11	37	wednesday	Entenweidstrasse	2.61017e+06	1.26863e+06	functioning	aedes	0	0	0	0	14.3	13.5
115	6	2024-09-11	37	wednesday	Entenweidstrasse	2.61017e+06	1.26863e+06	functioning	culex	0	0	0	0	14.3	13.5
115	6	2024-09-11	37	wednesday	Entenweidstrasse	2.61017e+06	1.26863e+06	functioning	psychodidae	0	0	0	0	14.3	13.5
115	6	2024-09-11	37	wednesday	Entenweidstrasse	2.61017e+06	1.26863e+06	functioning	undefined	0	0	0	0	14.3	13.5
10	8	2024-09-11	37	wednesday	Elsässerrheinweg	2.61087e+06	1.26863e+06	nonfunctioning						14.3	13.5	trap missing
94	10	2024-09-11	37	wednesday	Vogesenstrasse	2.61034e+06	1.26861e+06	functioning	aedes	0	0	0	0	14.3	13.5
94	10	2024-09-11	37	wednesday	Vogesenstrasse	2.61034e+06	1.26861e+06	functioning	chironomidae	0	0	0	0	14.3	13.5
94	10	2024-09-11	37	wednesday	Vogesenstrasse	2.61034e+06	1.26861e+06	functioning	culex	0	0	0	0	14.3	13.5
94	10	2024-09-11	37	wednesday	Vogesenstrasse	2.61034e+06	1.26861e+06	functioning	psychodidae	0	0	0	0	14.3	13.5
94	10	2024-09-11	37	wednesday	Vogesenstrasse	2.61034e+06	1.26861e+06	functioning	undefined	0	0	0	0	14.3	13.5
66	8	2024-09-11	37	wednesday	Ryffstrasse	2.61046e+06	1.2686e+06	nonfunctioning						14.3	13.5	fell over/ no water in catch basin
51	6	2024-09-11	37	wednesday	Mülhauserstrasse	2.61055e+06	1.26859e+06	functioning	aedes	0	0	0	0	14.3	13.5
51	6	2024-09-11	37	wednesday	Mülhauserstrasse	2.61055e+06	1.26859e+06	functioning	chironomidae	0	0	0	0	14.3	13.5
51	6	2024-09-11	37	wednesday	Mülhauserstrasse	2.61055e+06	1.26859e+06	functioning	culex	0	0	0	0	14.3	13.5
51	6	2024-09-11	37	wednesday	Mülhauserstrasse	2.61055e+06	1.26859e+06	functioning	psychodidae	0	0	0	0	14.3	13.5
51	6	2024-09-11	37	wednesday	Mülhauserstrasse	2.61055e+06	1.26859e+06	functioning	undefined	0	0	0	0	14.3	13.5
145	6	2024-09-11	37	wednesday	Largitzenstrasse	2.60984e+06	1.26859e+06	functioning	aedes	0	0	0	0	14.3	13.5
145	6	2024-09-11	37	wednesday	Largitzenstrasse	2.60984e+06	1.26859e+06	functioning	chironomidae	0	0	0	0	14.3	13.5
145	6	2024-09-11	37	wednesday	Largitzenstrasse	2.60984e+06	1.26859e+06	functioning	culex	0	0	0	0	14.3	13.5
145	6	2024-09-11	37	wednesday	Largitzenstrasse	2.60984e+06	1.26859e+06	functioning	psychodidae	0	0	0	0	14.3	13.5
145	6	2024-09-11	37	wednesday	Largitzenstrasse	2.60984e+06	1.26859e+06	functioning	undefined	0	0	0	0	14.3	13.5
48	0	2024-09-11	37	wednesday	Jungstrasse	2.61058e+06	1.26853e+06	functioning	culex	3	3	0	3	14.3	13.5
48	0	2024-09-11	37	wednesday	Jungstrasse	2.61058e+06	1.26853e+06	functioning	aedes	0	0	0	0	14.3	13.5
48	0	2024-09-11	37	wednesday	Jungstrasse	2.61058e+06	1.26853e+06	functioning	chironomidae	0	0	0	0	14.3	13.5
48	0	2024-09-11	37	wednesday	Jungstrasse	2.61058e+06	1.26853e+06	functioning	psychodidae	0	0	0	0	14.3	13.5
48	0	2024-09-11	37	wednesday	Jungstrasse	2.61058e+06	1.26853e+06	functioning	undefined	0	0	0	0	14.3	13.5
56	4	2024-09-11	37	wednesday	Lothringerstrasse	2.61051e+06	1.26853e+06	functioning	aedes	1	1	0	1	14.3	13.5
56	4	2024-09-11	37	wednesday	Lothringerstrasse	2.61051e+06	1.26853e+06	functioning	chironomidae	0	0	0	0	14.3	13.5
56	4	2024-09-11	37	wednesday	Lothringerstrasse	2.61051e+06	1.26853e+06	functioning	culex	0	0	0	0	14.3	13.5
56	4	2024-09-11	37	wednesday	Lothringerstrasse	2.61051e+06	1.26853e+06	functioning	psychodidae	0	0	0	0	14.3	13.5
56	4	2024-09-11	37	wednesday	Lothringerstrasse	2.61051e+06	1.26853e+06	functioning	undefined	0	0	0	0	14.3	13.5
14	6	2024-09-11	37	wednesday	St. Johanns-Ring	2.61085e+06	1.26849e+06	functioning	aedes	0	0	0	0	14.3	13.5
14	6	2024-09-11	37	wednesday	St. Johanns-Ring	2.61085e+06	1.26849e+06	functioning	chironomidae	0	0	0	0	14.3	13.5
14	6	2024-09-11	37	wednesday	St. Johanns-Ring	2.61085e+06	1.26849e+06	functioning	culex	0	0	0	0	14.3	13.5
14	6	2024-09-11	37	wednesday	St. Johanns-Ring	2.61085e+06	1.26849e+06	functioning	psychodidae	0	0	0	0	14.3	13.5
14	6	2024-09-11	37	wednesday	St. Johanns-Ring	2.61085e+06	1.26849e+06	functioning	undefined	0	0	0	0	14.3	13.5
96	4	2024-09-11	37	wednesday	Davidsbodenstrasse	2.61032e+06	1.26844e+06	functioning	aedes	0	0	0	0	14.3	13.5
96	4	2024-09-11	37	wednesday	Davidsbodenstrasse	2.61032e+06	1.26844e+06	functioning	chironomidae	0	0	0	0	14.3	13.5
96	4	2024-09-11	37	wednesday	Davidsbodenstrasse	2.61032e+06	1.26844e+06	functioning	culex	0	0	0	0	14.3	13.5
96	4	2024-09-11	37	wednesday	Davidsbodenstrasse	2.61032e+06	1.26844e+06	functioning	psychodidae	0	0	0	0	14.3	13.5
96	4	2024-09-11	37	wednesday	Davidsbodenstrasse	2.61032e+06	1.26844e+06	functioning	undefined	0	0	0	0	14.3	13.5
153	8	2024-09-11	37	wednesday	Glaserbergstrasse	2.60979e+06	1.26842e+06	functioning	aedes	0	0	0	0	14.3	13.5
153	8	2024-09-11	37	wednesday	Glaserbergstrasse	2.60979e+06	1.26842e+06	functioning	chironomidae	0	0	0	0	14.3	13.5
153	8	2024-09-11	37	wednesday	Glaserbergstrasse	2.60979e+06	1.26842e+06	functioning	culex	0	0	0	0	14.3	13.5
153	8	2024-09-11	37	wednesday	Glaserbergstrasse	2.60979e+06	1.26842e+06	functioning	psychodidae	0	0	0	0	14.3	13.5
153	8	2024-09-11	37	wednesday	Glaserbergstrasse	2.60979e+06	1.26842e+06	functioning	undefined	0	0	0	0	14.3	13.5
59	0	2024-09-11	37	wednesday	Vogesenstrasse	2.6105e+06	1.26841e+06	functioning	culex	6	0	0	6	14.3	13.5
59	0	2024-09-11	37	wednesday	Vogesenstrasse	2.6105e+06	1.26841e+06	functioning	aedes	0	0	0	0	14.3	13.5
59	0	2024-09-11	37	wednesday	Vogesenstrasse	2.6105e+06	1.26841e+06	functioning	chironomidae	0	0	0	0	14.3	13.5
59	0	2024-09-11	37	wednesday	Vogesenstrasse	2.6105e+06	1.26841e+06	functioning	psychodidae	0	0	0	0	14.3	13.5
59	0	2024-09-11	37	wednesday	Vogesenstrasse	2.6105e+06	1.26841e+06	functioning	undefined	0	0	0	0	14.3	13.5
109	2	2024-09-11	37	wednesday	Mülhauserstrasse	2.61025e+06	1.26837e+06	functioning	aedes	0	0	0	0	14.3	13.5
109	2	2024-09-11	37	wednesday	Mülhauserstrasse	2.61025e+06	1.26837e+06	functioning	chironomidae	0	0	0	0	14.3	13.5
109	2	2024-09-11	37	wednesday	Mülhauserstrasse	2.61025e+06	1.26837e+06	functioning	culex	0	0	0	0	14.3	13.5
109	2	2024-09-11	37	wednesday	Mülhauserstrasse	2.61025e+06	1.26837e+06	functioning	psychodidae	0	0	0	0	14.3	13.5
109	2	2024-09-11	37	wednesday	Mülhauserstrasse	2.61025e+06	1.26837e+06	functioning	undefined	0	0	0	0	14.3	13.5
72	10	2024-09-11	37	wednesday	Davidsbodenstrasse	2.61042e+06	1.26833e+06	functioning	aedes	0	0	0	0	14.3	13.5
72	10	2024-09-11	37	wednesday	Davidsbodenstrasse	2.61042e+06	1.26833e+06	functioning	chironomidae	0	0	0	0	14.3	13.5
72	10	2024-09-11	37	wednesday	Davidsbodenstrasse	2.61042e+06	1.26833e+06	functioning	culex	0	0	0	0	14.3	13.5
72	10	2024-09-11	37	wednesday	Davidsbodenstrasse	2.61042e+06	1.26833e+06	functioning	psychodidae	0	0	0	0	14.3	13.5
72	10	2024-09-11	37	wednesday	Davidsbodenstrasse	2.61042e+06	1.26833e+06	functioning	undefined	0	0	0	0	14.3	13.5
17	2	2024-09-11	37	wednesday	Johanniterstrasse	2.61084e+06	1.26831e+06	functioning	aedes	0	0	0	0	14.3	13.5
17	2	2024-09-11	37	wednesday	Johanniterstrasse	2.61084e+06	1.26831e+06	functioning	chironomidae	0	0	0	0	14.3	13.5
17	2	2024-09-11	37	wednesday	Johanniterstrasse	2.61084e+06	1.26831e+06	functioning	culex	0	0	0	0	14.3	13.5
17	2	2024-09-11	37	wednesday	Johanniterstrasse	2.61084e+06	1.26831e+06	functioning	psychodidae	0	0	0	0	14.3	13.5
17	2	2024-09-11	37	wednesday	Johanniterstrasse	2.61084e+06	1.26831e+06	functioning	undefined	0	0	0	0	14.3	13.5
52	4	2024-09-11	37	wednesday	St. Johanns-Ring	2.61054e+06	1.26829e+06	functioning	chironomidae	2	2	0	2	14.3	13.5
52	4	2024-09-11	37	wednesday	St. Johanns-Ring	2.61054e+06	1.26829e+06	functioning	aedes	0	0	0	0	14.3	13.5
52	4	2024-09-11	37	wednesday	St. Johanns-Ring	2.61054e+06	1.26829e+06	functioning	culex	0	0	0	0	14.3	13.5
52	4	2024-09-11	37	wednesday	St. Johanns-Ring	2.61054e+06	1.26829e+06	functioning	psychodidae	0	0	0	0	14.3	13.5
52	4	2024-09-11	37	wednesday	St. Johanns-Ring	2.61054e+06	1.26829e+06	functioning	undefined	0	0	0	0	14.3	13.5
113	0	2024-09-11	37	wednesday	Mittlere Strasse	2.6102e+06	1.26828e+06	nonfunctioning						14.3	13.5	fell over
86	4	2024-09-11	37	wednesday	Hebelstrasse	2.61037e+06	1.26818e+06	functioning	aedes	0	0	0	0	14.3	13.5
86	4	2024-09-11	37	wednesday	Hebelstrasse	2.61037e+06	1.26818e+06	functioning	chironomidae	0	0	0	0	14.3	13.5
86	4	2024-09-11	37	wednesday	Hebelstrasse	2.61037e+06	1.26818e+06	functioning	culex	0	0	0	0	14.3	13.5
86	4	2024-09-11	37	wednesday	Hebelstrasse	2.61037e+06	1.26818e+06	functioning	psychodidae	0	0	0	0	14.3	13.5
86	4	2024-09-11	37	wednesday	Hebelstrasse	2.61037e+06	1.26818e+06	functioning	undefined	0	0	0	0	14.3	13.5
4	0	2024-09-11	37	wednesday	St. Johanns-Rheinweg	2.611e+06	1.26811e+06	nonfunctioning						14.3	13.5	fell over
35	4	2024-09-11	37	wednesday	Klingelbergstrasse	2.61067e+06	1.26798e+06	nonfunctioning						14.3	13.5	fell over
1	8	2024-09-11	37	wednesday	Totentanz	2.61106e+06	1.26796e+06	nonfunctioning						14.3	13.5	fell over
36	2	2024-09-11	37	wednesday	Klingelbergstrasse	2.61067e+06	1.26779e+06	functioning	aedes	0	0	0	0	14.3	13.5
36	2	2024-09-11	37	wednesday	Klingelbergstrasse	2.61067e+06	1.26779e+06	functioning	chironomidae	0	0	0	0	14.3	13.5
36	2	2024-09-11	37	wednesday	Klingelbergstrasse	2.61067e+06	1.26779e+06	functioning	culex	0	0	0	0	14.3	13.5
36	2	2024-09-11	37	wednesday	Klingelbergstrasse	2.61067e+06	1.26779e+06	functioning	psychodidae	0	0	0	0	14.3	13.5
36	2	2024-09-11	37	wednesday	Klingelbergstrasse	2.61067e+06	1.26779e+06	functioning	undefined	0	0	0	0	14.3	13.5
41	8	2024-09-11	37	wednesday	Klingelbergstrasse	2.61064e+06	1.26774e+06	functioning	aedes	0	0	0	0	14.3	13.5
41	8	2024-09-11	37	wednesday	Klingelbergstrasse	2.61064e+06	1.26774e+06	functioning	chironomidae	0	0	0	0	14.3	13.5
41	8	2024-09-11	37	wednesday	Klingelbergstrasse	2.61064e+06	1.26774e+06	functioning	culex	0	0	0	0	14.3	13.5
41	8	2024-09-11	37	wednesday	Klingelbergstrasse	2.61064e+06	1.26774e+06	functioning	psychodidae	0	0	0	0	14.3	13.5
41	8	2024-09-11	37	wednesday	Klingelbergstrasse	2.61064e+06	1.26774e+06	functioning	undefined	0	0	0	0	14.3	13.5
29	2	2024-09-11	37	wednesday	Schönbeinstrasse	2.61071e+06	1.26758e+06	functioning	aedes	0	0	0	0	14.3	13.5
29	2	2024-09-11	37	wednesday	Schönbeinstrasse	2.61071e+06	1.26758e+06	functioning	chironomidae	0	0	0	0	14.3	13.5
29	2	2024-09-11	37	wednesday	Schönbeinstrasse	2.61071e+06	1.26758e+06	functioning	culex	0	0	0	0	14.3	13.5
29	2	2024-09-11	37	wednesday	Schönbeinstrasse	2.61071e+06	1.26758e+06	functioning	psychodidae	0	0	0	0	14.3	13.5
29	2	2024-09-11	37	wednesday	Schönbeinstrasse	2.61071e+06	1.26758e+06	functioning	undefined	0	0	0	0	14.3	13.5
111	10	2024-09-09	37	monday	Kohlenstrasse	2.61023e+06	1.26947e+06	functioning	psychodidae	4	0	4	4	17.1	10
111	10	2024-09-09	37	monday	Kohlenstrasse	2.61023e+06	1.26947e+06	functioning	undefined	2	0	2	2	17.1	10
111	10	2024-09-09	37	monday	Kohlenstrasse	2.61023e+06	1.26947e+06	functioning	chironomidae	1	0	1	1	17.1	10
111	10	2024-09-09	37	monday	Kohlenstrasse	2.61023e+06	1.26947e+06	functioning	aedes	0	0	0	0	17.1	10
111	10	2024-09-09	37	monday	Kohlenstrasse	2.61023e+06	1.26947e+06	functioning	culex	0	0	0	0	17.1	10
176	10	2024-09-09	37	monday	Schlachthofstrasse	2.60945e+06	1.26943e+06	functioning	aedes	0	0	0	0	17.1	10
176	10	2024-09-09	37	monday	Schlachthofstrasse	2.60945e+06	1.26943e+06	functioning	chironomidae	0	0	0	0	17.1	10
176	10	2024-09-09	37	monday	Schlachthofstrasse	2.60945e+06	1.26943e+06	functioning	culex	0	0	0	0	17.1	10
176	10	2024-09-09	37	monday	Schlachthofstrasse	2.60945e+06	1.26943e+06	functioning	psychodidae	0	0	0	0	17.1	10
176	10	2024-09-09	37	monday	Schlachthofstrasse	2.60945e+06	1.26943e+06	functioning	undefined	0	0	0	0	17.1	10
126	4	2024-09-09	37	monday	Lysbüchelstrasse	2.61006e+06	1.26932e+06	functioning	aedes	0	0	0	0	17.1	10
126	4	2024-09-09	37	monday	Lysbüchelstrasse	2.61006e+06	1.26932e+06	functioning	chironomidae	0	0	0	0	17.1	10
126	4	2024-09-09	37	monday	Lysbüchelstrasse	2.61006e+06	1.26932e+06	functioning	culex	0	0	0	0	17.1	10
126	4	2024-09-09	37	monday	Lysbüchelstrasse	2.61006e+06	1.26932e+06	functioning	psychodidae	0	0	0	0	17.1	10
126	4	2024-09-09	37	monday	Lysbüchelstrasse	2.61006e+06	1.26932e+06	functioning	undefined	0	0	0	0	17.1	10
163	0	2024-09-09	37	monday	Hagenaustrasse	2.60972e+06	1.26916e+06	nonfunctioning						17.1	10	fell over
84	2	2024-09-09	37	monday	Hüningerstrasse	2.61038e+06	1.26912e+06	functioning	aedes	0	0	0	0	17.1	10
84	2	2024-09-09	37	monday	Hüningerstrasse	2.61038e+06	1.26912e+06	functioning	chironomidae	0	0	0	0	17.1	10
84	2	2024-09-09	37	monday	Hüningerstrasse	2.61038e+06	1.26912e+06	functioning	culex	0	0	0	0	17.1	10
84	2	2024-09-09	37	monday	Hüningerstrasse	2.61038e+06	1.26912e+06	functioning	psychodidae	0	0	0	0	17.1	10
84	2	2024-09-09	37	monday	Hüningerstrasse	2.61038e+06	1.26912e+06	functioning	undefined	0	0	0	0	17.1	10
150	0	2024-09-09	37	monday	Hagenaustrasse	2.60981e+06	1.26908e+06	functioning	chironomidae	5	4	0	5	17.1	10
150	0	2024-09-09	37	monday	Hagenaustrasse	2.60981e+06	1.26908e+06	functioning	aedes	0	0	0	0	17.1	10
150	0	2024-09-09	37	monday	Hagenaustrasse	2.60981e+06	1.26908e+06	functioning	culex	0	0	0	0	17.1	10
150	0	2024-09-09	37	monday	Hagenaustrasse	2.60981e+06	1.26908e+06	functioning	psychodidae	0	0	0	0	17.1	10
150	0	2024-09-09	37	monday	Hagenaustrasse	2.60981e+06	1.26908e+06	functioning	undefined	0	0	0	0	17.1	10
108	6	2024-09-09	37	monday	Beckenweg	2.61026e+06	1.26907e+06	functioning	aedes	1	0	0	1	17.1	10
108	6	2024-09-09	37	monday	Beckenweg	2.61026e+06	1.26907e+06	functioning	chironomidae	0	0	0	0	17.1	10
108	6	2024-09-09	37	monday	Beckenweg	2.61026e+06	1.26907e+06	functioning	culex	0	0	0	0	17.1	10
108	6	2024-09-09	37	monday	Beckenweg	2.61026e+06	1.26907e+06	functioning	psychodidae	0	0	0	0	17.1	10
108	6	2024-09-09	37	monday	Beckenweg	2.61026e+06	1.26907e+06	functioning	undefined	0	0	0	0	17.1	10
112	6	2024-09-09	37	monday	Lothringerstrasse	2.6102e+06	1.26903e+06	functioning	aedes	0	0	0	0	17.1	10
112	6	2024-09-09	37	monday	Lothringerstrasse	2.6102e+06	1.26903e+06	functioning	chironomidae	0	0	0	0	17.1	10
112	6	2024-09-09	37	monday	Lothringerstrasse	2.6102e+06	1.26903e+06	functioning	culex	0	0	0	0	17.1	10
112	6	2024-09-09	37	monday	Lothringerstrasse	2.6102e+06	1.26903e+06	functioning	psychodidae	0	0	0	0	17.1	10
112	6	2024-09-09	37	monday	Lothringerstrasse	2.6102e+06	1.26903e+06	functioning	undefined	0	0	0	0	17.1	10
101	8	2024-09-09	37	monday	Hüningerstrasse	2.6103e+06	1.26903e+06	functioning	aedes	0	0	0	0	17.1	10
101	8	2024-09-09	37	monday	Hüningerstrasse	2.6103e+06	1.26903e+06	functioning	chironomidae	0	0	0	0	17.1	10
101	8	2024-09-09	37	monday	Hüningerstrasse	2.6103e+06	1.26903e+06	functioning	culex	0	0	0	0	17.1	10
101	8	2024-09-09	37	monday	Hüningerstrasse	2.6103e+06	1.26903e+06	functioning	psychodidae	0	0	0	0	17.1	10
101	8	2024-09-09	37	monday	Hüningerstrasse	2.6103e+06	1.26903e+06	functioning	undefined	0	0	0	0	17.1	10
104	4	2024-09-09	37	monday	Lothringerstrasse	2.61028e+06	1.26891e+06	functioning	aedes	0	0	0	0	17.1	10
104	4	2024-09-09	37	monday	Lothringerstrasse	2.61028e+06	1.26891e+06	functioning	chironomidae	0	0	0	0	17.1	10
104	4	2024-09-09	37	monday	Lothringerstrasse	2.61028e+06	1.26891e+06	functioning	culex	0	0	0	0	17.1	10
104	4	2024-09-09	37	monday	Lothringerstrasse	2.61028e+06	1.26891e+06	functioning	psychodidae	0	0	0	0	17.1	10
104	4	2024-09-09	37	monday	Lothringerstrasse	2.61028e+06	1.26891e+06	functioning	undefined	0	0	0	0	17.1	10
133	4	2024-09-09	37	monday	Im Wasenboden	2.61e+06	1.26881e+06	functioning	aedes	0	0	0	0	17.1	10
133	4	2024-09-09	37	monday	Im Wasenboden	2.61e+06	1.26881e+06	functioning	chironomidae	0	0	0	0	17.1	10
133	4	2024-09-09	37	monday	Im Wasenboden	2.61e+06	1.26881e+06	functioning	culex	0	0	0	0	17.1	10
133	4	2024-09-09	37	monday	Im Wasenboden	2.61e+06	1.26881e+06	functioning	psychodidae	0	0	0	0	17.1	10
133	4	2024-09-09	37	monday	Im Wasenboden	2.61e+06	1.26881e+06	functioning	undefined	0	0	0	0	17.1	10
50	10	2024-09-09	37	monday	Landskronstrasse	2.61056e+06	1.26875e+06	functioning	aedes	0	0	0	0	17.1	10
50	10	2024-09-09	37	monday	Landskronstrasse	2.61056e+06	1.26875e+06	functioning	chironomidae	0	0	0	0	17.1	10
50	10	2024-09-09	37	monday	Landskronstrasse	2.61056e+06	1.26875e+06	functioning	culex	0	0	0	0	17.1	10
50	10	2024-09-09	37	monday	Landskronstrasse	2.61056e+06	1.26875e+06	functioning	psychodidae	0	0	0	0	17.1	10
50	10	2024-09-09	37	monday	Landskronstrasse	2.61056e+06	1.26875e+06	functioning	undefined	0	0	0	0	17.1	10
54	10	2024-09-09	37	monday	Wattstrasse	2.61052e+06	1.26874e+06	functioning	aedes	0	0	0	0	17.1	10
54	10	2024-09-09	37	monday	Wattstrasse	2.61052e+06	1.26874e+06	functioning	chironomidae	0	0	0	0	17.1	10
54	10	2024-09-09	37	monday	Wattstrasse	2.61052e+06	1.26874e+06	functioning	culex	0	0	0	0	17.1	10
54	10	2024-09-09	37	monday	Wattstrasse	2.61052e+06	1.26874e+06	functioning	psychodidae	0	0	0	0	17.1	10
54	10	2024-09-09	37	monday	Wattstrasse	2.61052e+06	1.26874e+06	functioning	undefined	0	0	0	0	17.1	10
136	10	2024-09-09	37	monday	Lenzgasse	2.60995e+06	1.26867e+06	functioning	aedes	0	0	0	0	17.1	10
136	10	2024-09-09	37	monday	Lenzgasse	2.60995e+06	1.26867e+06	functioning	chironomidae	0	0	0	0	17.1	10
136	10	2024-09-09	37	monday	Lenzgasse	2.60995e+06	1.26867e+06	functioning	culex	0	0	0	0	17.1	10
136	10	2024-09-09	37	monday	Lenzgasse	2.60995e+06	1.26867e+06	functioning	psychodidae	0	0	0	0	17.1	10
136	10	2024-09-09	37	monday	Lenzgasse	2.60995e+06	1.26867e+06	functioning	undefined	0	0	0	0	17.1	10
139	6	2024-09-09	37	monday	Flughafenstrasse	2.60988e+06	1.26864e+06	functioning	aedes	0	0	0	0	17.1	10
139	6	2024-09-09	37	monday	Flughafenstrasse	2.60988e+06	1.26864e+06	functioning	chironomidae	0	0	0	0	17.1	10
139	6	2024-09-09	37	monday	Flughafenstrasse	2.60988e+06	1.26864e+06	functioning	culex	0	0	0	0	17.1	10
139	6	2024-09-09	37	monday	Flughafenstrasse	2.60988e+06	1.26864e+06	functioning	psychodidae	0	0	0	0	17.1	10
139	6	2024-09-09	37	monday	Flughafenstrasse	2.60988e+06	1.26864e+06	functioning	undefined	0	0	0	0	17.1	10
47	2	2024-09-09	37	monday	Mülhauserstrasse	2.61059e+06	1.26862e+06	functioning	aedes	0	0	0	0	17.1	10
47	2	2024-09-09	37	monday	Mülhauserstrasse	2.61059e+06	1.26862e+06	functioning	chironomidae	0	0	0	0	17.1	10
47	2	2024-09-09	37	monday	Mülhauserstrasse	2.61059e+06	1.26862e+06	functioning	culex	0	0	0	0	17.1	10
47	2	2024-09-09	37	monday	Mülhauserstrasse	2.61059e+06	1.26862e+06	functioning	psychodidae	0	0	0	0	17.1	10
47	2	2024-09-09	37	monday	Mülhauserstrasse	2.61059e+06	1.26862e+06	functioning	undefined	0	0	0	0	17.1	10
82	0	2024-09-09	37	monday	Vogesenstrasse	2.61039e+06	1.26856e+06	functioning	culex	10	4	4	10	17.1	10
82	0	2024-09-09	37	monday	Vogesenstrasse	2.61039e+06	1.26856e+06	functioning	psychodidae	2	0	2	2	17.1	10
82	0	2024-09-09	37	monday	Vogesenstrasse	2.61039e+06	1.26856e+06	functioning	aedes	1	0	0	1	17.1	10
82	0	2024-09-09	37	monday	Vogesenstrasse	2.61039e+06	1.26856e+06	functioning	chironomidae	0	0	0	0	17.1	10
82	0	2024-09-09	37	monday	Vogesenstrasse	2.61039e+06	1.26856e+06	functioning	undefined	0	0	0	0	17.1	10
170	10	2024-09-09	37	monday	Julia Gauss-Strasse	2.60953e+06	1.26855e+06	functioning	psychodidae	4	0	4	4	17.1	10
170	10	2024-09-09	37	monday	Julia Gauss-Strasse	2.60953e+06	1.26855e+06	functioning	culex	1	1	0	1	17.1	10
170	10	2024-09-09	37	monday	Julia Gauss-Strasse	2.60953e+06	1.26855e+06	functioning	aedes	1	0	0	1	17.1	10
170	10	2024-09-09	37	monday	Julia Gauss-Strasse	2.60953e+06	1.26855e+06	functioning	chironomidae	0	0	0	0	17.1	10
170	10	2024-09-09	37	monday	Julia Gauss-Strasse	2.60953e+06	1.26855e+06	functioning	undefined	0	0	0	0	17.1	10
173	10	2024-09-09	37	monday	Julia Gauss-Strasse	2.60949e+06	1.26849e+06	functioning	aedes	0	0	0	0	17.1	10
173	10	2024-09-09	37	monday	Julia Gauss-Strasse	2.60949e+06	1.26849e+06	functioning	chironomidae	0	0	0	0	17.1	10
173	10	2024-09-09	37	monday	Julia Gauss-Strasse	2.60949e+06	1.26849e+06	functioning	culex	0	0	0	0	17.1	10
173	10	2024-09-09	37	monday	Julia Gauss-Strasse	2.60949e+06	1.26849e+06	functioning	psychodidae	0	0	0	0	17.1	10
173	10	2024-09-09	37	monday	Julia Gauss-Strasse	2.60949e+06	1.26849e+06	functioning	undefined	0	0	0	0	17.1	10
71	2	2024-09-09	37	monday	Mülhauserstrasse	2.61043e+06	1.26849e+06	functioning	aedes	0	0	0	0	17.1	10
71	2	2024-09-09	37	monday	Mülhauserstrasse	2.61043e+06	1.26849e+06	functioning	chironomidae	0	0	0	0	17.1	10
71	2	2024-09-09	37	monday	Mülhauserstrasse	2.61043e+06	1.26849e+06	functioning	culex	0	0	0	0	17.1	10
71	2	2024-09-09	37	monday	Mülhauserstrasse	2.61043e+06	1.26849e+06	functioning	psychodidae	0	0	0	0	17.1	10
71	2	2024-09-09	37	monday	Mülhauserstrasse	2.61043e+06	1.26849e+06	functioning	undefined	0	0	0	0	17.1	10
166	2	2024-09-09	37	monday	Dammerkirchstrasse	2.60965e+06	1.26847e+06	functioning	aedes	0	0	0	0	17.1	10
166	2	2024-09-09	37	monday	Dammerkirchstrasse	2.60965e+06	1.26847e+06	functioning	chironomidae	0	0	0	0	17.1	10
166	2	2024-09-09	37	monday	Dammerkirchstrasse	2.60965e+06	1.26847e+06	functioning	culex	0	0	0	0	17.1	10
166	2	2024-09-09	37	monday	Dammerkirchstrasse	2.60965e+06	1.26847e+06	functioning	psychodidae	0	0	0	0	17.1	10
166	2	2024-09-09	37	monday	Dammerkirchstrasse	2.60965e+06	1.26847e+06	functioning	undefined	0	0	0	0	17.1	10
19	10	2024-09-09	37	monday	St. Johanns-Vorstadt	2.6108e+06	1.26837e+06	functioning	chironomidae	5	4	0	5	17.1	10
19	10	2024-09-09	37	monday	St. Johanns-Vorstadt	2.6108e+06	1.26837e+06	functioning	psychodidae	1	0	1	1	17.1	10
19	10	2024-09-09	37	monday	St. Johanns-Vorstadt	2.6108e+06	1.26837e+06	functioning	aedes	0	0	0	0	17.1	10
19	10	2024-09-09	37	monday	St. Johanns-Vorstadt	2.6108e+06	1.26837e+06	functioning	culex	0	0	0	0	17.1	10
19	10	2024-09-09	37	monday	St. Johanns-Vorstadt	2.6108e+06	1.26837e+06	functioning	undefined	0	0	0	0	17.1	10
22	10	2024-09-09	37	monday	St. Johanns-Platz	2.61077e+06	1.26834e+06	functioning	aedes	0	0	0	0	17.1	10
22	10	2024-09-09	37	monday	St. Johanns-Platz	2.61077e+06	1.26834e+06	functioning	chironomidae	0	0	0	0	17.1	10
22	10	2024-09-09	37	monday	St. Johanns-Platz	2.61077e+06	1.26834e+06	functioning	culex	0	0	0	0	17.1	10
22	10	2024-09-09	37	monday	St. Johanns-Platz	2.61077e+06	1.26834e+06	functioning	psychodidae	0	0	0	0	17.1	10
22	10	2024-09-09	37	monday	St. Johanns-Platz	2.61077e+06	1.26834e+06	functioning	undefined	0	0	0	0	17.1	10
97	2	2024-09-09	37	monday	Am Krayenrain	2.61032e+06	1.26833e+06	functioning	aedes	0	0	0	0	17.1	10
97	2	2024-09-09	37	monday	Am Krayenrain	2.61032e+06	1.26833e+06	functioning	chironomidae	0	0	0	0	17.1	10
97	2	2024-09-09	37	monday	Am Krayenrain	2.61032e+06	1.26833e+06	functioning	culex	0	0	0	0	17.1	10
97	2	2024-09-09	37	monday	Am Krayenrain	2.61032e+06	1.26833e+06	functioning	psychodidae	0	0	0	0	17.1	10
97	2	2024-09-09	37	monday	Am Krayenrain	2.61032e+06	1.26833e+06	functioning	undefined	0	0	0	0	17.1	10
23	6	2024-09-09	37	monday	Pestalozzistrasse	2.61076e+06	1.26832e+06	functioning	aedes	0	0	0	0	17.1	10
23	6	2024-09-09	37	monday	Pestalozzistrasse	2.61076e+06	1.26832e+06	functioning	chironomidae	0	0	0	0	17.1	10
23	6	2024-09-09	37	monday	Pestalozzistrasse	2.61076e+06	1.26832e+06	functioning	culex	0	0	0	0	17.1	10
23	6	2024-09-09	37	monday	Pestalozzistrasse	2.61076e+06	1.26832e+06	functioning	psychodidae	0	0	0	0	17.1	10
23	6	2024-09-09	37	monday	Pestalozzistrasse	2.61076e+06	1.26832e+06	functioning	undefined	0	0	0	0	17.1	10
24	6	2024-09-09	37	monday	Pestalozzistrasse	2.61075e+06	1.2683e+06	functioning	aedes	0	0	0	0	17.1	10
24	6	2024-09-09	37	monday	Pestalozzistrasse	2.61075e+06	1.2683e+06	functioning	chironomidae	0	0	0	0	17.1	10
24	6	2024-09-09	37	monday	Pestalozzistrasse	2.61075e+06	1.2683e+06	functioning	culex	0	0	0	0	17.1	10
24	6	2024-09-09	37	monday	Pestalozzistrasse	2.61075e+06	1.2683e+06	functioning	psychodidae	0	0	0	0	17.1	10
24	6	2024-09-09	37	monday	Pestalozzistrasse	2.61075e+06	1.2683e+06	functioning	undefined	0	0	0	0	17.1	10
27	4	2024-09-09	37	monday	Pestalozzistrasse	2.61071e+06	1.26828e+06	functioning	aedes	0	0	0	0	17.1	10
27	4	2024-09-09	37	monday	Pestalozzistrasse	2.61071e+06	1.26828e+06	functioning	chironomidae	0	0	0	0	17.1	10
27	4	2024-09-09	37	monday	Pestalozzistrasse	2.61071e+06	1.26828e+06	functioning	culex	0	0	0	0	17.1	10
27	4	2024-09-09	37	monday	Pestalozzistrasse	2.61071e+06	1.26828e+06	functioning	psychodidae	0	0	0	0	17.1	10
27	4	2024-09-09	37	monday	Pestalozzistrasse	2.61071e+06	1.26828e+06	functioning	undefined	0	0	0	0	17.1	10
99	6	2024-09-09	37	monday	Metzerstrasse	2.61031e+06	1.26825e+06	functioning	aedes	0	0	0	0	17.1	10
99	6	2024-09-09	37	monday	Metzerstrasse	2.61031e+06	1.26825e+06	functioning	chironomidae	0	0	0	0	17.1	10
99	6	2024-09-09	37	monday	Metzerstrasse	2.61031e+06	1.26825e+06	functioning	culex	0	0	0	0	17.1	10
99	6	2024-09-09	37	monday	Metzerstrasse	2.61031e+06	1.26825e+06	functioning	psychodidae	0	0	0	0	17.1	10
99	6	2024-09-09	37	monday	Metzerstrasse	2.61031e+06	1.26825e+06	functioning	undefined	0	0	0	0	17.1	10
75	8	2024-09-09	37	monday	Metzerstrasse	2.61041e+06	1.26822e+06	functioning	aedes	0	0	0	0	17.1	10
75	8	2024-09-09	37	monday	Metzerstrasse	2.61041e+06	1.26822e+06	functioning	chironomidae	0	0	0	0	17.1	10
75	8	2024-09-09	37	monday	Metzerstrasse	2.61041e+06	1.26822e+06	functioning	culex	0	0	0	0	17.1	10
75	8	2024-09-09	37	monday	Metzerstrasse	2.61041e+06	1.26822e+06	functioning	psychodidae	0	0	0	0	17.1	10
75	8	2024-09-09	37	monday	Metzerstrasse	2.61041e+06	1.26822e+06	functioning	undefined	0	0	0	0	17.1	10
26	4	2024-09-09	37	monday	Spitalstrasse	2.61074e+06	1.26821e+06	functioning	aedes	0	0	0	0	17.1	10
26	4	2024-09-09	37	monday	Spitalstrasse	2.61074e+06	1.26821e+06	functioning	chironomidae	0	0	0	0	17.1	10
26	4	2024-09-09	37	monday	Spitalstrasse	2.61074e+06	1.26821e+06	functioning	culex	0	0	0	0	17.1	10
26	4	2024-09-09	37	monday	Spitalstrasse	2.61074e+06	1.26821e+06	functioning	psychodidae	0	0	0	0	17.1	10
26	4	2024-09-09	37	monday	Spitalstrasse	2.61074e+06	1.26821e+06	functioning	undefined	0	0	0	0	17.1	10
77	4	2024-09-09	37	monday	Metzerstrasse	2.61041e+06	1.26821e+06	functioning	aedes	0	0	0	0	17.1	10
77	4	2024-09-09	37	monday	Metzerstrasse	2.61041e+06	1.26821e+06	functioning	chironomidae	0	0	0	0	17.1	10
77	4	2024-09-09	37	monday	Metzerstrasse	2.61041e+06	1.26821e+06	functioning	culex	0	0	0	0	17.1	10
77	4	2024-09-09	37	monday	Metzerstrasse	2.61041e+06	1.26821e+06	functioning	psychodidae	0	0	0	0	17.1	10
77	4	2024-09-09	37	monday	Metzerstrasse	2.61041e+06	1.26821e+06	functioning	undefined	0	0	0	0	17.1	10
5	0	2024-09-09	37	monday	St. Johanns-Rheinweg	2.61095e+06	1.26821e+06	functioning	chironomidae	1	0	0	1	17.1	10
5	0	2024-09-09	37	monday	St. Johanns-Rheinweg	2.61095e+06	1.26821e+06	functioning	aedes	0	0	0	0	17.1	10
5	0	2024-09-09	37	monday	St. Johanns-Rheinweg	2.61095e+06	1.26821e+06	functioning	culex	0	0	0	0	17.1	10
5	0	2024-09-09	37	monday	St. Johanns-Rheinweg	2.61095e+06	1.26821e+06	functioning	psychodidae	0	0	0	0	17.1	10
5	0	2024-09-09	37	monday	St. Johanns-Rheinweg	2.61095e+06	1.26821e+06	functioning	undefined	0	0	0	0	17.1	10
7	10	2024-09-09	37	monday	St. Johanns-Vorstadt	2.61092e+06	1.2682e+06	functioning	aedes	0	0	0	0	17.1	10
7	10	2024-09-09	37	monday	St. Johanns-Vorstadt	2.61092e+06	1.2682e+06	functioning	chironomidae	0	0	0	0	17.1	10
7	10	2024-09-09	37	monday	St. Johanns-Vorstadt	2.61092e+06	1.2682e+06	functioning	culex	0	0	0	0	17.1	10
7	10	2024-09-09	37	monday	St. Johanns-Vorstadt	2.61092e+06	1.2682e+06	functioning	psychodidae	0	0	0	0	17.1	10
7	10	2024-09-09	37	monday	St. Johanns-Vorstadt	2.61092e+06	1.2682e+06	functioning	undefined	0	0	0	0	17.1	10
65	0	2024-09-09	37	monday	St. Johanns-Ring	2.61046e+06	1.26818e+06	nonfunctioning						17.1	10	fell over
6	2	2024-09-09	37	monday	St. Johanns-Vorstadt	2.61094e+06	1.26816e+06	functioning	aedes	0	0	0	0	17.1	10
6	2	2024-09-09	37	monday	St. Johanns-Vorstadt	2.61094e+06	1.26816e+06	functioning	chironomidae	0	0	0	0	17.1	10
6	2	2024-09-09	37	monday	St. Johanns-Vorstadt	2.61094e+06	1.26816e+06	functioning	culex	0	0	0	0	17.1	10
6	2	2024-09-09	37	monday	St. Johanns-Vorstadt	2.61094e+06	1.26816e+06	functioning	psychodidae	0	0	0	0	17.1	10
6	2	2024-09-09	37	monday	St. Johanns-Vorstadt	2.61094e+06	1.26816e+06	functioning	undefined	0	0	0	0	17.1	10
70	6	2024-09-09	37	monday	St. Johanns-Ring	2.61044e+06	1.26816e+06	functioning	aedes	0	0	0	0	17.1	10
70	6	2024-09-09	37	monday	St. Johanns-Ring	2.61044e+06	1.26816e+06	functioning	chironomidae	0	0	0	0	17.1	10
70	6	2024-09-09	37	monday	St. Johanns-Ring	2.61044e+06	1.26816e+06	functioning	culex	0	0	0	0	17.1	10
70	6	2024-09-09	37	monday	St. Johanns-Ring	2.61044e+06	1.26816e+06	functioning	psychodidae	0	0	0	0	17.1	10
70	6	2024-09-09	37	monday	St. Johanns-Ring	2.61044e+06	1.26816e+06	functioning	undefined	0	0	0	0	17.1	10
103	6	2024-09-09	37	monday	Sommergasse	2.61028e+06	1.26806e+06	nonfunctioning						17.1	10	broken
39	6	2024-09-09	37	monday	Klingelbergstrasse	2.61066e+06	1.26805e+06	functioning	aedes	0	0	0	0	17.1	10
39	6	2024-09-09	37	monday	Klingelbergstrasse	2.61066e+06	1.26805e+06	functioning	chironomidae	0	0	0	0	17.1	10
39	6	2024-09-09	37	monday	Klingelbergstrasse	2.61066e+06	1.26805e+06	functioning	culex	0	0	0	0	17.1	10
39	6	2024-09-09	37	monday	Klingelbergstrasse	2.61066e+06	1.26805e+06	functioning	psychodidae	0	0	0	0	17.1	10
39	6	2024-09-09	37	monday	Klingelbergstrasse	2.61066e+06	1.26805e+06	functioning	undefined	0	0	0	0	17.1	10
64	0	2024-09-09	37	monday	Hebelstrasse	2.61048e+06	1.26805e+06	functioning	aedes	0	0	0	0	17.1	10
64	0	2024-09-09	37	monday	Hebelstrasse	2.61048e+06	1.26805e+06	functioning	chironomidae	0	0	0	0	17.1	10
64	0	2024-09-09	37	monday	Hebelstrasse	2.61048e+06	1.26805e+06	functioning	culex	0	0	0	0	17.1	10
64	0	2024-09-09	37	monday	Hebelstrasse	2.61048e+06	1.26805e+06	functioning	psychodidae	0	0	0	0	17.1	10
64	0	2024-09-09	37	monday	Hebelstrasse	2.61048e+06	1.26805e+06	functioning	undefined	0	0	0	0	17.1	10
3	2	2024-09-09	37	monday	St. Johanns-Vorstadt	2.61102e+06	1.268e+06	functioning	aedes	0	0	0	0	17.1	10
3	2	2024-09-09	37	monday	St. Johanns-Vorstadt	2.61102e+06	1.268e+06	functioning	chironomidae	0	0	0	0	17.1	10
3	2	2024-09-09	37	monday	St. Johanns-Vorstadt	2.61102e+06	1.268e+06	functioning	culex	0	0	0	0	17.1	10
3	2	2024-09-09	37	monday	St. Johanns-Vorstadt	2.61102e+06	1.268e+06	functioning	psychodidae	0	0	0	0	17.1	10
3	2	2024-09-09	37	monday	St. Johanns-Vorstadt	2.61102e+06	1.268e+06	functioning	undefined	0	0	0	0	17.1	10
38	10	2024-09-09	37	monday	Bernoullistrasse	2.61066e+06	1.26771e+06	functioning	aedes	0	0	0	0	17.1	10
38	10	2024-09-09	37	monday	Bernoullistrasse	2.61066e+06	1.26771e+06	functioning	chironomidae	0	0	0	0	17.1	10
38	10	2024-09-09	37	monday	Bernoullistrasse	2.61066e+06	1.26771e+06	functioning	culex	0	0	0	0	17.1	10
38	10	2024-09-09	37	monday	Bernoullistrasse	2.61066e+06	1.26771e+06	functioning	psychodidae	0	0	0	0	17.1	10
38	10	2024-09-09	37	monday	Bernoullistrasse	2.61066e+06	1.26771e+06	functioning	undefined	0	0	0	0	17.1	10
42	8	2024-09-09	37	monday	Mittlere Strasse	2.61064e+06	1.26771e+06	functioning	aedes	0	0	0	0	17.1	10
42	8	2024-09-09	37	monday	Mittlere Strasse	2.61064e+06	1.26771e+06	functioning	chironomidae	0	0	0	0	17.1	10
42	8	2024-09-09	37	monday	Mittlere Strasse	2.61064e+06	1.26771e+06	functioning	culex	0	0	0	0	17.1	10
42	8	2024-09-09	37	monday	Mittlere Strasse	2.61064e+06	1.26771e+06	functioning	psychodidae	0	0	0	0	17.1	10
42	8	2024-09-09	37	monday	Mittlere Strasse	2.61064e+06	1.26771e+06	functioning	undefined	0	0	0	0	17.1	10
127	10	2024-08-07	32	wednesday	Elsässerstrasse	2.61005e+06	1.26957e+06	functioning	aedes	0	0	0	0	23.1	7.8
127	10	2024-08-07	32	wednesday	Elsässerstrasse	2.61005e+06	1.26957e+06	functioning	chironomidae	0	0	0	0	23.1	7.8
127	10	2024-08-07	32	wednesday	Elsässerstrasse	2.61005e+06	1.26957e+06	functioning	culex	0	0	0	0	23.1	7.8
127	10	2024-08-07	32	wednesday	Elsässerstrasse	2.61005e+06	1.26957e+06	functioning	psychodidae	0	0	0	0	23.1	7.8
127	10	2024-08-07	32	wednesday	Elsässerstrasse	2.61005e+06	1.26957e+06	functioning	undefined	0	0	0	0	23.1	7.8
131	2	2024-08-07	32	wednesday	Schlachthofstrasse	2.61001e+06	1.26952e+06	functioning	aedes	0	0	0	0	23.1	7.8
131	2	2024-08-07	32	wednesday	Schlachthofstrasse	2.61001e+06	1.26952e+06	functioning	chironomidae	0	0	0	0	23.1	7.8
131	2	2024-08-07	32	wednesday	Schlachthofstrasse	2.61001e+06	1.26952e+06	functioning	culex	0	0	0	0	23.1	7.8
131	2	2024-08-07	32	wednesday	Schlachthofstrasse	2.61001e+06	1.26952e+06	functioning	psychodidae	0	0	0	0	23.1	7.8
131	2	2024-08-07	32	wednesday	Schlachthofstrasse	2.61001e+06	1.26952e+06	functioning	undefined	0	0	0	0	23.1	7.8
124	10	2024-08-07	32	wednesday	Schlachthofstrasse	2.61007e+06	1.2695e+06	functioning	undefined	1	0	1	1	23.1	7.8
124	10	2024-08-07	32	wednesday	Schlachthofstrasse	2.61007e+06	1.2695e+06	functioning	aedes	0	0	0	0	23.1	7.8
124	10	2024-08-07	32	wednesday	Schlachthofstrasse	2.61007e+06	1.2695e+06	functioning	chironomidae	0	0	0	0	23.1	7.8
124	10	2024-08-07	32	wednesday	Schlachthofstrasse	2.61007e+06	1.2695e+06	functioning	culex	0	0	0	0	23.1	7.8
124	10	2024-08-07	32	wednesday	Schlachthofstrasse	2.61007e+06	1.2695e+06	functioning	psychodidae	0	0	0	0	23.1	7.8
135	4	2024-08-07	32	wednesday	Lysbüchelstrasse	2.60996e+06	1.26949e+06	functioning	aedes	0	0	0	0	23.1	7.8
135	4	2024-08-07	32	wednesday	Lysbüchelstrasse	2.60996e+06	1.26949e+06	functioning	chironomidae	0	0	0	0	23.1	7.8
135	4	2024-08-07	32	wednesday	Lysbüchelstrasse	2.60996e+06	1.26949e+06	functioning	culex	0	0	0	0	23.1	7.8
135	4	2024-08-07	32	wednesday	Lysbüchelstrasse	2.60996e+06	1.26949e+06	functioning	psychodidae	0	0	0	0	23.1	7.8
135	4	2024-08-07	32	wednesday	Lysbüchelstrasse	2.60996e+06	1.26949e+06	functioning	undefined	0	0	0	0	23.1	7.8
174	4	2024-08-07	32	wednesday	Schlachthofstrasse	2.60946e+06	1.26945e+06	functioning	aedes	0	0	0	0	23.1	7.8
174	4	2024-08-07	32	wednesday	Schlachthofstrasse	2.60946e+06	1.26945e+06	functioning	chironomidae	0	0	0	0	23.1	7.8
174	4	2024-08-07	32	wednesday	Schlachthofstrasse	2.60946e+06	1.26945e+06	functioning	culex	0	0	0	0	23.1	7.8
174	4	2024-08-07	32	wednesday	Schlachthofstrasse	2.60946e+06	1.26945e+06	functioning	psychodidae	0	0	0	0	23.1	7.8
174	4	2024-08-07	32	wednesday	Schlachthofstrasse	2.60946e+06	1.26945e+06	functioning	undefined	0	0	0	0	23.1	7.8
92	2	2024-08-07	32	wednesday	Kohlenstrasse	2.61035e+06	1.26943e+06	nonfunctioning						23.1	7.8	fell over
91	6	2024-08-07	32	wednesday	Kohlenstrasse	2.61035e+06	1.26942e+06	functioning	aedes	0	0	0	0	23.1	7.8
91	6	2024-08-07	32	wednesday	Kohlenstrasse	2.61035e+06	1.26942e+06	functioning	chironomidae	0	0	0	0	23.1	7.8
91	6	2024-08-07	32	wednesday	Kohlenstrasse	2.61035e+06	1.26942e+06	functioning	culex	0	0	0	0	23.1	7.8
91	6	2024-08-07	32	wednesday	Kohlenstrasse	2.61035e+06	1.26942e+06	functioning	psychodidae	0	0	0	0	23.1	7.8
91	6	2024-08-07	32	wednesday	Kohlenstrasse	2.61035e+06	1.26942e+06	functioning	undefined	0	0	0	0	23.1	7.8
177	10	2024-08-07	32	wednesday	Flughafenstrasse	2.60938e+06	1.26931e+06	functioning	aedes	0	0	0	0	23.1	7.8
177	10	2024-08-07	32	wednesday	Flughafenstrasse	2.60938e+06	1.26931e+06	functioning	chironomidae	0	0	0	0	23.1	7.8
177	10	2024-08-07	32	wednesday	Flughafenstrasse	2.60938e+06	1.26931e+06	functioning	culex	0	0	0	0	23.1	7.8
177	10	2024-08-07	32	wednesday	Flughafenstrasse	2.60938e+06	1.26931e+06	functioning	psychodidae	0	0	0	0	23.1	7.8
177	10	2024-08-07	32	wednesday	Flughafenstrasse	2.60938e+06	1.26931e+06	functioning	undefined	0	0	0	0	23.1	7.8
122	8	2024-08-07	32	wednesday	Lysbüchelstrasse	2.61008e+06	1.26928e+06	functioning	aedes	0	0	0	0	23.1	7.8
122	8	2024-08-07	32	wednesday	Lysbüchelstrasse	2.61008e+06	1.26928e+06	functioning	chironomidae	0	0	0	0	23.1	7.8
122	8	2024-08-07	32	wednesday	Lysbüchelstrasse	2.61008e+06	1.26928e+06	functioning	culex	0	0	0	0	23.1	7.8
122	8	2024-08-07	32	wednesday	Lysbüchelstrasse	2.61008e+06	1.26928e+06	functioning	psychodidae	0	0	0	0	23.1	7.8
122	8	2024-08-07	32	wednesday	Lysbüchelstrasse	2.61008e+06	1.26928e+06	functioning	undefined	0	0	0	0	23.1	7.8
152	8	2024-08-07	32	wednesday	Hagenaustrasse	2.6098e+06	1.2692e+06	functioning	culex	6	1	0	6	23.1	7.8
152	8	2024-08-07	32	wednesday	Hagenaustrasse	2.6098e+06	1.2692e+06	functioning	aedes	0	0	0	0	23.1	7.8
152	8	2024-08-07	32	wednesday	Hagenaustrasse	2.6098e+06	1.2692e+06	functioning	chironomidae	0	0	0	0	23.1	7.8
152	8	2024-08-07	32	wednesday	Hagenaustrasse	2.6098e+06	1.2692e+06	functioning	psychodidae	0	0	0	0	23.1	7.8
152	8	2024-08-07	32	wednesday	Hagenaustrasse	2.6098e+06	1.2692e+06	functioning	undefined	0	0	0	0	23.1	7.8
125	0	2024-08-07	32	wednesday	Lysbüchelstrasse	2.61007e+06	1.26918e+06	functioning	aedes	0	0	0	0	23.1	7.8
125	0	2024-08-07	32	wednesday	Lysbüchelstrasse	2.61007e+06	1.26918e+06	functioning	chironomidae	0	0	0	0	23.1	7.8
125	0	2024-08-07	32	wednesday	Lysbüchelstrasse	2.61007e+06	1.26918e+06	functioning	culex	0	0	0	0	23.1	7.8
125	0	2024-08-07	32	wednesday	Lysbüchelstrasse	2.61007e+06	1.26918e+06	functioning	psychodidae	0	0	0	0	23.1	7.8
125	0	2024-08-07	32	wednesday	Lysbüchelstrasse	2.61007e+06	1.26918e+06	functioning	undefined	0	0	0	0	23.1	7.8
143	10	2024-08-07	32	wednesday	Hagenaustrasse	2.60985e+06	1.26914e+06	functioning	aedes	0	0	0	0	23.1	7.8
143	10	2024-08-07	32	wednesday	Hagenaustrasse	2.60985e+06	1.26914e+06	functioning	chironomidae	0	0	0	0	23.1	7.8
143	10	2024-08-07	32	wednesday	Hagenaustrasse	2.60985e+06	1.26914e+06	functioning	culex	0	0	0	0	23.1	7.8
143	10	2024-08-07	32	wednesday	Hagenaustrasse	2.60985e+06	1.26914e+06	functioning	psychodidae	0	0	0	0	23.1	7.8
143	10	2024-08-07	32	wednesday	Hagenaustrasse	2.60985e+06	1.26914e+06	functioning	undefined	0	0	0	0	23.1	7.8
179	6	2024-08-07	32	wednesday	Friedrich Miescher-Strasse	2.60934e+06	1.26911e+06	functioning	aedes	0	0	0	0	23.1	7.8
179	6	2024-08-07	32	wednesday	Friedrich Miescher-Strasse	2.60934e+06	1.26911e+06	functioning	chironomidae	0	0	0	0	23.1	7.8
179	6	2024-08-07	32	wednesday	Friedrich Miescher-Strasse	2.60934e+06	1.26911e+06	functioning	culex	0	0	0	0	23.1	7.8
179	6	2024-08-07	32	wednesday	Friedrich Miescher-Strasse	2.60934e+06	1.26911e+06	functioning	psychodidae	0	0	0	0	23.1	7.8
179	6	2024-08-07	32	wednesday	Friedrich Miescher-Strasse	2.60934e+06	1.26911e+06	functioning	undefined	0	0	0	0	23.1	7.8
141	0	2024-08-07	32	wednesday	Hagenaustrasse	2.60986e+06	1.26911e+06	functioning	aedes	1	0	0	1	23.1	7.8
141	0	2024-08-07	32	wednesday	Hagenaustrasse	2.60986e+06	1.26911e+06	functioning	chironomidae	0	0	0	0	23.1	7.8
141	0	2024-08-07	32	wednesday	Hagenaustrasse	2.60986e+06	1.26911e+06	functioning	culex	0	0	0	0	23.1	7.8
141	0	2024-08-07	32	wednesday	Hagenaustrasse	2.60986e+06	1.26911e+06	functioning	psychodidae	0	0	0	0	23.1	7.8
141	0	2024-08-07	32	wednesday	Hagenaustrasse	2.60986e+06	1.26911e+06	functioning	undefined	0	0	0	0	23.1	7.8
30	0	2024-08-07	32	wednesday	Fabrikstrasse	2.61071e+06	1.26894e+06	functioning	aedes	0	0	0	0	23.1	7.8
30	0	2024-08-07	32	wednesday	Fabrikstrasse	2.61071e+06	1.26894e+06	functioning	chironomidae	0	0	0	0	23.1	7.8
30	0	2024-08-07	32	wednesday	Fabrikstrasse	2.61071e+06	1.26894e+06	functioning	culex	0	0	0	0	23.1	7.8
30	0	2024-08-07	32	wednesday	Fabrikstrasse	2.61071e+06	1.26894e+06	functioning	psychodidae	0	0	0	0	23.1	7.8
30	0	2024-08-07	32	wednesday	Fabrikstrasse	2.61071e+06	1.26894e+06	functioning	undefined	0	0	0	0	23.1	7.8
89	10	2024-08-07	32	wednesday	Lothringerstrasse	2.61037e+06	1.26876e+06	functioning	aedes	0	0	0	0	23.1	7.8
89	10	2024-08-07	32	wednesday	Lothringerstrasse	2.61037e+06	1.26876e+06	functioning	chironomidae	0	0	0	0	23.1	7.8
89	10	2024-08-07	32	wednesday	Lothringerstrasse	2.61037e+06	1.26876e+06	functioning	culex	0	0	0	0	23.1	7.8
89	10	2024-08-07	32	wednesday	Lothringerstrasse	2.61037e+06	1.26876e+06	functioning	psychodidae	0	0	0	0	23.1	7.8
89	10	2024-08-07	32	wednesday	Lothringerstrasse	2.61037e+06	1.26876e+06	functioning	undefined	0	0	0	0	23.1	7.8
25	2	2024-08-07	32	wednesday	Mülhauserstrasse	2.61074e+06	1.26873e+06	functioning	aedes	0	0	0	0	23.1	7.8
25	2	2024-08-07	32	wednesday	Mülhauserstrasse	2.61074e+06	1.26873e+06	functioning	chironomidae	0	0	0	0	23.1	7.8
25	2	2024-08-07	32	wednesday	Mülhauserstrasse	2.61074e+06	1.26873e+06	functioning	culex	0	0	0	0	23.1	7.8
25	2	2024-08-07	32	wednesday	Mülhauserstrasse	2.61074e+06	1.26873e+06	functioning	psychodidae	0	0	0	0	23.1	7.8
25	2	2024-08-07	32	wednesday	Mülhauserstrasse	2.61074e+06	1.26873e+06	functioning	undefined	0	0	0	0	23.1	7.8
116	6	2024-08-07	32	wednesday	Entenweidstrasse	2.61016e+06	1.26871e+06	functioning	aedes	0	0	0	0	23.1	7.8
116	6	2024-08-07	32	wednesday	Entenweidstrasse	2.61016e+06	1.26871e+06	functioning	chironomidae	0	0	0	0	23.1	7.8
116	6	2024-08-07	32	wednesday	Entenweidstrasse	2.61016e+06	1.26871e+06	functioning	culex	0	0	0	0	23.1	7.8
116	6	2024-08-07	32	wednesday	Entenweidstrasse	2.61016e+06	1.26871e+06	functioning	psychodidae	0	0	0	0	23.1	7.8
116	6	2024-08-07	32	wednesday	Entenweidstrasse	2.61016e+06	1.26871e+06	functioning	undefined	0	0	0	0	23.1	7.8
32	6	2024-08-07	32	wednesday	Mülhauserstrasse	2.6107e+06	1.26868e+06	functioning	aedes	0	0	0	0	23.1	7.8
32	6	2024-08-07	32	wednesday	Mülhauserstrasse	2.6107e+06	1.26868e+06	functioning	chironomidae	0	0	0	0	23.1	7.8
32	6	2024-08-07	32	wednesday	Mülhauserstrasse	2.6107e+06	1.26868e+06	functioning	culex	0	0	0	0	23.1	7.8
32	6	2024-08-07	32	wednesday	Mülhauserstrasse	2.6107e+06	1.26868e+06	functioning	psychodidae	0	0	0	0	23.1	7.8
32	6	2024-08-07	32	wednesday	Mülhauserstrasse	2.6107e+06	1.26868e+06	functioning	undefined	0	0	0	0	23.1	7.8
98	6	2024-08-07	32	wednesday	Vogesenstrasse	2.61032e+06	1.26864e+06	functioning	aedes	0	0	0	0	23.1	7.8
98	6	2024-08-07	32	wednesday	Vogesenstrasse	2.61032e+06	1.26864e+06	functioning	chironomidae	0	0	0	0	23.1	7.8
98	6	2024-08-07	32	wednesday	Vogesenstrasse	2.61032e+06	1.26864e+06	functioning	culex	0	0	0	0	23.1	7.8
98	6	2024-08-07	32	wednesday	Vogesenstrasse	2.61032e+06	1.26864e+06	functioning	psychodidae	0	0	0	0	23.1	7.8
98	6	2024-08-07	32	wednesday	Vogesenstrasse	2.61032e+06	1.26864e+06	functioning	undefined	0	0	0	0	23.1	7.8
115	6	2024-08-07	32	wednesday	Entenweidstrasse	2.61017e+06	1.26863e+06	functioning	aedes	0	0	0	0	23.1	7.8
115	6	2024-08-07	32	wednesday	Entenweidstrasse	2.61017e+06	1.26863e+06	functioning	chironomidae	0	0	0	0	23.1	7.8
115	6	2024-08-07	32	wednesday	Entenweidstrasse	2.61017e+06	1.26863e+06	functioning	culex	0	0	0	0	23.1	7.8
115	6	2024-08-07	32	wednesday	Entenweidstrasse	2.61017e+06	1.26863e+06	functioning	psychodidae	0	0	0	0	23.1	7.8
115	6	2024-08-07	32	wednesday	Entenweidstrasse	2.61017e+06	1.26863e+06	functioning	undefined	0	0	0	0	23.1	7.8
10	8	2024-08-07	32	wednesday	Elsässerrheinweg	2.61087e+06	1.26863e+06	functioning	aedes	0	0	0	0	23.1	7.8
10	8	2024-08-07	32	wednesday	Elsässerrheinweg	2.61087e+06	1.26863e+06	functioning	chironomidae	0	0	0	0	23.1	7.8
10	8	2024-08-07	32	wednesday	Elsässerrheinweg	2.61087e+06	1.26863e+06	functioning	culex	0	0	0	0	23.1	7.8
10	8	2024-08-07	32	wednesday	Elsässerrheinweg	2.61087e+06	1.26863e+06	functioning	psychodidae	0	0	0	0	23.1	7.8
10	8	2024-08-07	32	wednesday	Elsässerrheinweg	2.61087e+06	1.26863e+06	functioning	undefined	0	0	0	0	23.1	7.8
94	10	2024-08-07	32	wednesday	Vogesenstrasse	2.61034e+06	1.26861e+06	functioning	culex	2	2	0	2	23.1	7.8
94	10	2024-08-07	32	wednesday	Vogesenstrasse	2.61034e+06	1.26861e+06	functioning	aedes	0	0	0	0	23.1	7.8
94	10	2024-08-07	32	wednesday	Vogesenstrasse	2.61034e+06	1.26861e+06	functioning	chironomidae	0	0	0	0	23.1	7.8
94	10	2024-08-07	32	wednesday	Vogesenstrasse	2.61034e+06	1.26861e+06	functioning	psychodidae	0	0	0	0	23.1	7.8
94	10	2024-08-07	32	wednesday	Vogesenstrasse	2.61034e+06	1.26861e+06	functioning	undefined	0	0	0	0	23.1	7.8
66	8	2024-08-07	32	wednesday	Ryffstrasse	2.61046e+06	1.2686e+06	functioning	aedes	0	0	0	0	23.1	7.8
66	8	2024-08-07	32	wednesday	Ryffstrasse	2.61046e+06	1.2686e+06	functioning	chironomidae	0	0	0	0	23.1	7.8
66	8	2024-08-07	32	wednesday	Ryffstrasse	2.61046e+06	1.2686e+06	functioning	culex	0	0	0	0	23.1	7.8
66	8	2024-08-07	32	wednesday	Ryffstrasse	2.61046e+06	1.2686e+06	functioning	psychodidae	0	0	0	0	23.1	7.8
66	8	2024-08-07	32	wednesday	Ryffstrasse	2.61046e+06	1.2686e+06	functioning	undefined	0	0	0	0	23.1	7.8
51	6	2024-08-07	32	wednesday	Mülhauserstrasse	2.61055e+06	1.26859e+06	functioning	aedes	0	0	0	0	23.1	7.8
51	6	2024-08-07	32	wednesday	Mülhauserstrasse	2.61055e+06	1.26859e+06	functioning	chironomidae	0	0	0	0	23.1	7.8
51	6	2024-08-07	32	wednesday	Mülhauserstrasse	2.61055e+06	1.26859e+06	functioning	culex	0	0	0	0	23.1	7.8
51	6	2024-08-07	32	wednesday	Mülhauserstrasse	2.61055e+06	1.26859e+06	functioning	psychodidae	0	0	0	0	23.1	7.8
51	6	2024-08-07	32	wednesday	Mülhauserstrasse	2.61055e+06	1.26859e+06	functioning	undefined	0	0	0	0	23.1	7.8
145	6	2024-08-07	32	wednesday	Largitzenstrasse	2.60984e+06	1.26859e+06	functioning	aedes	0	0	0	0	23.1	7.8
145	6	2024-08-07	32	wednesday	Largitzenstrasse	2.60984e+06	1.26859e+06	functioning	chironomidae	0	0	0	0	23.1	7.8
145	6	2024-08-07	32	wednesday	Largitzenstrasse	2.60984e+06	1.26859e+06	functioning	culex	0	0	0	0	23.1	7.8
145	6	2024-08-07	32	wednesday	Largitzenstrasse	2.60984e+06	1.26859e+06	functioning	psychodidae	0	0	0	0	23.1	7.8
145	6	2024-08-07	32	wednesday	Largitzenstrasse	2.60984e+06	1.26859e+06	functioning	undefined	0	0	0	0	23.1	7.8
48	0	2024-08-07	32	wednesday	Jungstrasse	2.61058e+06	1.26853e+06	nonfunctioning						23.1	7.8	fell over
56	4	2024-08-07	32	wednesday	Lothringerstrasse	2.61051e+06	1.26853e+06	functioning	aedes	0	0	0	0	23.1	7.8
56	4	2024-08-07	32	wednesday	Lothringerstrasse	2.61051e+06	1.26853e+06	functioning	chironomidae	0	0	0	0	23.1	7.8
56	4	2024-08-07	32	wednesday	Lothringerstrasse	2.61051e+06	1.26853e+06	functioning	culex	0	0	0	0	23.1	7.8
56	4	2024-08-07	32	wednesday	Lothringerstrasse	2.61051e+06	1.26853e+06	functioning	psychodidae	0	0	0	0	23.1	7.8
56	4	2024-08-07	32	wednesday	Lothringerstrasse	2.61051e+06	1.26853e+06	functioning	undefined	0	0	0	0	23.1	7.8
14	6	2024-08-07	32	wednesday	St. Johanns-Ring	2.61085e+06	1.26849e+06	functioning	aedes	0	0	0	0	23.1	7.8
14	6	2024-08-07	32	wednesday	St. Johanns-Ring	2.61085e+06	1.26849e+06	functioning	chironomidae	0	0	0	0	23.1	7.8
14	6	2024-08-07	32	wednesday	St. Johanns-Ring	2.61085e+06	1.26849e+06	functioning	culex	0	0	0	0	23.1	7.8
14	6	2024-08-07	32	wednesday	St. Johanns-Ring	2.61085e+06	1.26849e+06	functioning	psychodidae	0	0	0	0	23.1	7.8
14	6	2024-08-07	32	wednesday	St. Johanns-Ring	2.61085e+06	1.26849e+06	functioning	undefined	0	0	0	0	23.1	7.8
96	4	2024-08-07	32	wednesday	Davidsbodenstrasse	2.61032e+06	1.26844e+06	functioning	aedes	0	0	0	0	23.1	7.8
96	4	2024-08-07	32	wednesday	Davidsbodenstrasse	2.61032e+06	1.26844e+06	functioning	chironomidae	0	0	0	0	23.1	7.8
96	4	2024-08-07	32	wednesday	Davidsbodenstrasse	2.61032e+06	1.26844e+06	functioning	culex	0	0	0	0	23.1	7.8
96	4	2024-08-07	32	wednesday	Davidsbodenstrasse	2.61032e+06	1.26844e+06	functioning	psychodidae	0	0	0	0	23.1	7.8
96	4	2024-08-07	32	wednesday	Davidsbodenstrasse	2.61032e+06	1.26844e+06	functioning	undefined	0	0	0	0	23.1	7.8
153	8	2024-08-07	32	wednesday	Glaserbergstrasse	2.60979e+06	1.26842e+06	functioning	aedes	0	0	0	0	23.1	7.8
153	8	2024-08-07	32	wednesday	Glaserbergstrasse	2.60979e+06	1.26842e+06	functioning	chironomidae	0	0	0	0	23.1	7.8
153	8	2024-08-07	32	wednesday	Glaserbergstrasse	2.60979e+06	1.26842e+06	functioning	culex	0	0	0	0	23.1	7.8
153	8	2024-08-07	32	wednesday	Glaserbergstrasse	2.60979e+06	1.26842e+06	functioning	psychodidae	0	0	0	0	23.1	7.8
153	8	2024-08-07	32	wednesday	Glaserbergstrasse	2.60979e+06	1.26842e+06	functioning	undefined	0	0	0	0	23.1	7.8
59	0	2024-08-07	32	wednesday	Vogesenstrasse	2.6105e+06	1.26841e+06	functioning	culex	15	4	1	15	23.1	7.8
59	0	2024-08-07	32	wednesday	Vogesenstrasse	2.6105e+06	1.26841e+06	functioning	aedes	0	0	0	0	23.1	7.8
59	0	2024-08-07	32	wednesday	Vogesenstrasse	2.6105e+06	1.26841e+06	functioning	chironomidae	0	0	0	0	23.1	7.8
59	0	2024-08-07	32	wednesday	Vogesenstrasse	2.6105e+06	1.26841e+06	functioning	psychodidae	0	0	0	0	23.1	7.8
59	0	2024-08-07	32	wednesday	Vogesenstrasse	2.6105e+06	1.26841e+06	functioning	undefined	0	0	0	0	23.1	7.8
109	2	2024-08-07	32	wednesday	Mülhauserstrasse	2.61025e+06	1.26837e+06	functioning	aedes	0	0	0	0	23.1	7.8
109	2	2024-08-07	32	wednesday	Mülhauserstrasse	2.61025e+06	1.26837e+06	functioning	chironomidae	0	0	0	0	23.1	7.8
109	2	2024-08-07	32	wednesday	Mülhauserstrasse	2.61025e+06	1.26837e+06	functioning	culex	0	0	0	0	23.1	7.8
109	2	2024-08-07	32	wednesday	Mülhauserstrasse	2.61025e+06	1.26837e+06	functioning	psychodidae	0	0	0	0	23.1	7.8
109	2	2024-08-07	32	wednesday	Mülhauserstrasse	2.61025e+06	1.26837e+06	functioning	undefined	0	0	0	0	23.1	7.8
72	10	2024-08-07	32	wednesday	Davidsbodenstrasse	2.61042e+06	1.26833e+06	functioning	aedes	0	0	0	0	23.1	7.8
72	10	2024-08-07	32	wednesday	Davidsbodenstrasse	2.61042e+06	1.26833e+06	functioning	chironomidae	0	0	0	0	23.1	7.8
72	10	2024-08-07	32	wednesday	Davidsbodenstrasse	2.61042e+06	1.26833e+06	functioning	culex	0	0	0	0	23.1	7.8
72	10	2024-08-07	32	wednesday	Davidsbodenstrasse	2.61042e+06	1.26833e+06	functioning	psychodidae	0	0	0	0	23.1	7.8
72	10	2024-08-07	32	wednesday	Davidsbodenstrasse	2.61042e+06	1.26833e+06	functioning	undefined	0	0	0	0	23.1	7.8
17	2	2024-08-07	32	wednesday	Johanniterstrasse	2.61084e+06	1.26831e+06	functioning	aedes	0	0	0	0	23.1	7.8
17	2	2024-08-07	32	wednesday	Johanniterstrasse	2.61084e+06	1.26831e+06	functioning	chironomidae	0	0	0	0	23.1	7.8
17	2	2024-08-07	32	wednesday	Johanniterstrasse	2.61084e+06	1.26831e+06	functioning	culex	0	0	0	0	23.1	7.8
17	2	2024-08-07	32	wednesday	Johanniterstrasse	2.61084e+06	1.26831e+06	functioning	psychodidae	0	0	0	0	23.1	7.8
17	2	2024-08-07	32	wednesday	Johanniterstrasse	2.61084e+06	1.26831e+06	functioning	undefined	0	0	0	0	23.1	7.8
52	4	2024-08-07	32	wednesday	St. Johanns-Ring	2.61054e+06	1.26829e+06	functioning	aedes	0	0	0	0	23.1	7.8
52	4	2024-08-07	32	wednesday	St. Johanns-Ring	2.61054e+06	1.26829e+06	functioning	chironomidae	0	0	0	0	23.1	7.8
52	4	2024-08-07	32	wednesday	St. Johanns-Ring	2.61054e+06	1.26829e+06	functioning	culex	0	0	0	0	23.1	7.8
52	4	2024-08-07	32	wednesday	St. Johanns-Ring	2.61054e+06	1.26829e+06	functioning	psychodidae	0	0	0	0	23.1	7.8
52	4	2024-08-07	32	wednesday	St. Johanns-Ring	2.61054e+06	1.26829e+06	functioning	undefined	0	0	0	0	23.1	7.8
113	0	2024-08-07	32	wednesday	Mittlere Strasse	2.6102e+06	1.26828e+06	functioning	culex	52	20	16	52	23.1	7.8
113	0	2024-08-07	32	wednesday	Mittlere Strasse	2.6102e+06	1.26828e+06	functioning	aedes	0	0	0	0	23.1	7.8
113	0	2024-08-07	32	wednesday	Mittlere Strasse	2.6102e+06	1.26828e+06	functioning	chironomidae	0	0	0	0	23.1	7.8
113	0	2024-08-07	32	wednesday	Mittlere Strasse	2.6102e+06	1.26828e+06	functioning	psychodidae	0	0	0	0	23.1	7.8
113	0	2024-08-07	32	wednesday	Mittlere Strasse	2.6102e+06	1.26828e+06	functioning	undefined	0	0	0	0	23.1	7.8
86	4	2024-08-07	32	wednesday	Hebelstrasse	2.61037e+06	1.26818e+06	functioning	aedes	0	0	0	0	23.1	7.8
86	4	2024-08-07	32	wednesday	Hebelstrasse	2.61037e+06	1.26818e+06	functioning	chironomidae	0	0	0	0	23.1	7.8
86	4	2024-08-07	32	wednesday	Hebelstrasse	2.61037e+06	1.26818e+06	functioning	culex	0	0	0	0	23.1	7.8
86	4	2024-08-07	32	wednesday	Hebelstrasse	2.61037e+06	1.26818e+06	functioning	psychodidae	0	0	0	0	23.1	7.8
86	4	2024-08-07	32	wednesday	Hebelstrasse	2.61037e+06	1.26818e+06	functioning	undefined	0	0	0	0	23.1	7.8
4	0	2024-08-07	32	wednesday	St. Johanns-Rheinweg	2.611e+06	1.26811e+06	nonfunctioning						23.1	7.8	broken
35	4	2024-08-07	32	wednesday	Klingelbergstrasse	2.61067e+06	1.26798e+06	functioning	aedes	0	0	0	0	23.1	7.8
35	4	2024-08-07	32	wednesday	Klingelbergstrasse	2.61067e+06	1.26798e+06	functioning	chironomidae	0	0	0	0	23.1	7.8
35	4	2024-08-07	32	wednesday	Klingelbergstrasse	2.61067e+06	1.26798e+06	functioning	culex	0	0	0	0	23.1	7.8
35	4	2024-08-07	32	wednesday	Klingelbergstrasse	2.61067e+06	1.26798e+06	functioning	psychodidae	0	0	0	0	23.1	7.8
35	4	2024-08-07	32	wednesday	Klingelbergstrasse	2.61067e+06	1.26798e+06	functioning	undefined	0	0	0	0	23.1	7.8
1	8	2024-08-07	32	wednesday	Totentanz	2.61106e+06	1.26796e+06	functioning	aedes	0	0	0	0	23.1	7.8
1	8	2024-08-07	32	wednesday	Totentanz	2.61106e+06	1.26796e+06	functioning	chironomidae	0	0	0	0	23.1	7.8
1	8	2024-08-07	32	wednesday	Totentanz	2.61106e+06	1.26796e+06	functioning	culex	0	0	0	0	23.1	7.8
1	8	2024-08-07	32	wednesday	Totentanz	2.61106e+06	1.26796e+06	functioning	psychodidae	0	0	0	0	23.1	7.8
1	8	2024-08-07	32	wednesday	Totentanz	2.61106e+06	1.26796e+06	functioning	undefined	0	0	0	0	23.1	7.8
36	2	2024-08-07	32	wednesday	Klingelbergstrasse	2.61067e+06	1.26779e+06	functioning	aedes	0	0	0	0	23.1	7.8
36	2	2024-08-07	32	wednesday	Klingelbergstrasse	2.61067e+06	1.26779e+06	functioning	chironomidae	0	0	0	0	23.1	7.8
36	2	2024-08-07	32	wednesday	Klingelbergstrasse	2.61067e+06	1.26779e+06	functioning	culex	0	0	0	0	23.1	7.8
36	2	2024-08-07	32	wednesday	Klingelbergstrasse	2.61067e+06	1.26779e+06	functioning	psychodidae	0	0	0	0	23.1	7.8
36	2	2024-08-07	32	wednesday	Klingelbergstrasse	2.61067e+06	1.26779e+06	functioning	undefined	0	0	0	0	23.1	7.8
41	8	2024-08-07	32	wednesday	Klingelbergstrasse	2.61064e+06	1.26774e+06	functioning	culex	4	1	2	4	23.1	7.8
41	8	2024-08-07	32	wednesday	Klingelbergstrasse	2.61064e+06	1.26774e+06	functioning	aedes	0	0	0	0	23.1	7.8
41	8	2024-08-07	32	wednesday	Klingelbergstrasse	2.61064e+06	1.26774e+06	functioning	chironomidae	0	0	0	0	23.1	7.8
41	8	2024-08-07	32	wednesday	Klingelbergstrasse	2.61064e+06	1.26774e+06	functioning	psychodidae	0	0	0	0	23.1	7.8
41	8	2024-08-07	32	wednesday	Klingelbergstrasse	2.61064e+06	1.26774e+06	functioning	undefined	0	0	0	0	23.1	7.8
29	2	2024-08-07	32	wednesday	Schönbeinstrasse	2.61071e+06	1.26758e+06	functioning	aedes	0	0	0	0	23.1	7.8
29	2	2024-08-07	32	wednesday	Schönbeinstrasse	2.61071e+06	1.26758e+06	functioning	chironomidae	0	0	0	0	23.1	7.8
29	2	2024-08-07	32	wednesday	Schönbeinstrasse	2.61071e+06	1.26758e+06	functioning	culex	0	0	0	0	23.1	7.8
29	2	2024-08-07	32	wednesday	Schönbeinstrasse	2.61071e+06	1.26758e+06	functioning	psychodidae	0	0	0	0	23.1	7.8
29	2	2024-08-07	32	wednesday	Schönbeinstrasse	2.61071e+06	1.26758e+06	functioning	undefined	0	0	0	0	23.1	7.8
130	2	2024-10-24	43	thursday	Schlachthofstrasse	2.61001e+06	1.26953e+06	functioning	aedes	0	0	0	0	14.5	7.2
130	2	2024-10-24	43	thursday	Schlachthofstrasse	2.61001e+06	1.26953e+06	functioning	chironomidae	0	0	0	0	14.5	7.2
130	2	2024-10-24	43	thursday	Schlachthofstrasse	2.61001e+06	1.26953e+06	functioning	culex	0	0	0	0	14.5	7.2
130	2	2024-10-24	43	thursday	Schlachthofstrasse	2.61001e+06	1.26953e+06	functioning	psychodidae	0	0	0	0	14.5	7.2
130	2	2024-10-24	43	thursday	Schlachthofstrasse	2.61001e+06	1.26953e+06	functioning	undefined	0	0	0	0	14.5	7.2
172	2	2024-10-24	43	thursday	Neudorfstrasse	2.60952e+06	1.26945e+06	functioning	aedes	0	0	0	0	14.5	7.2
172	2	2024-10-24	43	thursday	Neudorfstrasse	2.60952e+06	1.26945e+06	functioning	chironomidae	0	0	0	0	14.5	7.2
172	2	2024-10-24	43	thursday	Neudorfstrasse	2.60952e+06	1.26945e+06	functioning	culex	0	0	0	0	14.5	7.2
172	2	2024-10-24	43	thursday	Neudorfstrasse	2.60952e+06	1.26945e+06	functioning	psychodidae	0	0	0	0	14.5	7.2
172	2	2024-10-24	43	thursday	Neudorfstrasse	2.60952e+06	1.26945e+06	functioning	undefined	0	0	0	0	14.5	7.2
102	0	2024-10-24	43	thursday	Kohlenstrasse	2.61028e+06	1.26944e+06	functioning	chironomidae	1	0	0	1	14.5	7.2
102	0	2024-10-24	43	thursday	Kohlenstrasse	2.61028e+06	1.26944e+06	functioning	aedes	0	0	0	0	14.5	7.2
102	0	2024-10-24	43	thursday	Kohlenstrasse	2.61028e+06	1.26944e+06	functioning	culex	0	0	0	0	14.5	7.2
102	0	2024-10-24	43	thursday	Kohlenstrasse	2.61028e+06	1.26944e+06	functioning	psychodidae	0	0	0	0	14.5	7.2
102	0	2024-10-24	43	thursday	Kohlenstrasse	2.61028e+06	1.26944e+06	functioning	undefined	0	0	0	0	14.5	7.2
146	10	2024-10-24	43	thursday	Hagenaustrasse	2.60983e+06	1.26923e+06	functioning	chironomidae	7	6	0	7	14.5	7.2
146	10	2024-10-24	43	thursday	Hagenaustrasse	2.60983e+06	1.26923e+06	functioning	aedes	0	0	0	0	14.5	7.2
146	10	2024-10-24	43	thursday	Hagenaustrasse	2.60983e+06	1.26923e+06	functioning	culex	0	0	0	0	14.5	7.2
146	10	2024-10-24	43	thursday	Hagenaustrasse	2.60983e+06	1.26923e+06	functioning	psychodidae	0	0	0	0	14.5	7.2
146	10	2024-10-24	43	thursday	Hagenaustrasse	2.60983e+06	1.26923e+06	functioning	undefined	0	0	0	0	14.5	7.2
175	6	2024-10-24	43	thursday	Friedrich Miescher-Strasse	2.60946e+06	1.26921e+06	functioning	aedes	0	0	0	0	14.5	7.2
175	6	2024-10-24	43	thursday	Friedrich Miescher-Strasse	2.60946e+06	1.26921e+06	functioning	chironomidae	0	0	0	0	14.5	7.2
175	6	2024-10-24	43	thursday	Friedrich Miescher-Strasse	2.60946e+06	1.26921e+06	functioning	culex	0	0	0	0	14.5	7.2
175	6	2024-10-24	43	thursday	Friedrich Miescher-Strasse	2.60946e+06	1.26921e+06	functioning	psychodidae	0	0	0	0	14.5	7.2
175	6	2024-10-24	43	thursday	Friedrich Miescher-Strasse	2.60946e+06	1.26921e+06	functioning	undefined	0	0	0	0	14.5	7.2
142	2	2024-10-24	43	thursday	Hagenaustrasse	2.60986e+06	1.26916e+06	functioning	aedes	0	0	0	0	14.5	7.2
142	2	2024-10-24	43	thursday	Hagenaustrasse	2.60986e+06	1.26916e+06	functioning	chironomidae	0	0	0	0	14.5	7.2
142	2	2024-10-24	43	thursday	Hagenaustrasse	2.60986e+06	1.26916e+06	functioning	culex	0	0	0	0	14.5	7.2
142	2	2024-10-24	43	thursday	Hagenaustrasse	2.60986e+06	1.26916e+06	functioning	psychodidae	0	0	0	0	14.5	7.2
142	2	2024-10-24	43	thursday	Hagenaustrasse	2.60986e+06	1.26916e+06	functioning	undefined	0	0	0	0	14.5	7.2
162	8	2024-10-14	43	thursday	Neudorfstrasse	2.60975e+06	1.26908e+06	nonfunctioning						14.5	7.2	fell over
144	0	2024-10-24	43	thursday	Hagenaustrasse	2.60984e+06	1.26905e+06	functioning	psychodidae	1	0	1	1	14.5	7.2
144	0	2024-10-24	43	thursday	Hagenaustrasse	2.60984e+06	1.26905e+06	functioning	aedes	0	0	0	0	14.5	7.2
144	0	2024-10-24	43	thursday	Hagenaustrasse	2.60984e+06	1.26905e+06	functioning	chironomidae	0	0	0	0	14.5	7.2
144	0	2024-10-24	43	thursday	Hagenaustrasse	2.60984e+06	1.26905e+06	functioning	culex	0	0	0	0	14.5	7.2
144	0	2024-10-24	43	thursday	Hagenaustrasse	2.60984e+06	1.26905e+06	functioning	undefined	0	0	0	0	14.5	7.2
100	10	2024-10-24	43	thursday	Beckenstrasse	2.6103e+06	1.26904e+06	functioning	aedes	0	0	0	0	14.5	7.2
100	10	2024-10-24	43	thursday	Beckenstrasse	2.6103e+06	1.26904e+06	functioning	chironomidae	0	0	0	0	14.5	7.2
100	10	2024-10-24	43	thursday	Beckenstrasse	2.6103e+06	1.26904e+06	functioning	culex	0	0	0	0	14.5	7.2
100	10	2024-10-24	43	thursday	Beckenstrasse	2.6103e+06	1.26904e+06	functioning	psychodidae	0	0	0	0	14.5	7.2
100	10	2024-10-24	43	thursday	Beckenstrasse	2.6103e+06	1.26904e+06	functioning	undefined	0	0	0	0	14.5	7.2
106	10	2024-10-24	43	thursday	Hüningerstrasse	2.61027e+06	1268969	functioning	chironomidae	4	1	0	4	14.5	7.2
106	10	2024-10-24	43	thursday	Hüningerstrasse	2.61027e+06	1268969	functioning	aedes	0	0	0	0	14.5	7.2
106	10	2024-10-24	43	thursday	Hüningerstrasse	2.61027e+06	1268969	functioning	culex	0	0	0	0	14.5	7.2
106	10	2024-10-24	43	thursday	Hüningerstrasse	2.61027e+06	1268969	functioning	psychodidae	0	0	0	0	14.5	7.2
106	10	2024-10-24	43	thursday	Hüningerstrasse	2.61027e+06	1268969	functioning	undefined	0	0	0	0	14.5	7.2
137	6	2024-10-24	43	thursday	Im Wasenboden	2.60992e+06	1.2689e+06	functioning	chironomidae	5	3	0	5	14.5	7.2
137	6	2024-10-24	43	thursday	Im Wasenboden	2.60992e+06	1.2689e+06	functioning	aedes	0	0	0	0	14.5	7.2
137	6	2024-10-24	43	thursday	Im Wasenboden	2.60992e+06	1.2689e+06	functioning	culex	0	0	0	0	14.5	7.2
137	6	2024-10-24	43	thursday	Im Wasenboden	2.60992e+06	1.2689e+06	functioning	psychodidae	0	0	0	0	14.5	7.2
137	6	2024-10-24	43	thursday	Im Wasenboden	2.60992e+06	1.2689e+06	functioning	undefined	0	0	0	0	14.5	7.2
118	10	2024-10-24	43	thursday	Entenweidstrasse	2.61014e+06	1.26878e+06	functioning	aedes	0	0	0	0	14.5	7.2
118	10	2024-10-24	43	thursday	Entenweidstrasse	2.61014e+06	1.26878e+06	functioning	chironomidae	0	0	0	0	14.5	7.2
118	10	2024-10-24	43	thursday	Entenweidstrasse	2.61014e+06	1.26878e+06	functioning	culex	0	0	0	0	14.5	7.2
118	10	2024-10-24	43	thursday	Entenweidstrasse	2.61014e+06	1.26878e+06	functioning	psychodidae	0	0	0	0	14.5	7.2
118	10	2024-10-24	43	thursday	Entenweidstrasse	2.61014e+06	1.26878e+06	functioning	undefined	0	0	0	0	14.5	7.2
16	4	2024-10-24	43	thursday	Elsässerrheinweg	2.61084e+06	1.26877e+06	functioning	aedes	0	0	0	0	14.5	7.2
16	4	2024-10-24	43	thursday	Elsässerrheinweg	2.61084e+06	1.26877e+06	functioning	chironomidae	0	0	0	0	14.5	7.2
16	4	2024-10-24	43	thursday	Elsässerrheinweg	2.61084e+06	1.26877e+06	functioning	culex	0	0	0	0	14.5	7.2
16	4	2024-10-24	43	thursday	Elsässerrheinweg	2.61084e+06	1.26877e+06	functioning	psychodidae	0	0	0	0	14.5	7.2
16	4	2024-10-24	43	thursday	Elsässerrheinweg	2.61084e+06	1.26877e+06	functioning	undefined	0	0	0	0	14.5	7.2
21	0	2024-10-24	43	thursday	Mülhauserstrasse	2.61078e+06	1.26877e+06	functioning	aedes	0	0	0	0	14.5	7.2
21	0	2024-10-24	43	thursday	Mülhauserstrasse	2.61078e+06	1.26877e+06	functioning	chironomidae	0	0	0	0	14.5	7.2
21	0	2024-10-24	43	thursday	Mülhauserstrasse	2.61078e+06	1.26877e+06	functioning	culex	0	0	0	0	14.5	7.2
21	0	2024-10-24	43	thursday	Mülhauserstrasse	2.61078e+06	1.26877e+06	functioning	psychodidae	0	0	0	0	14.5	7.2
21	0	2024-10-24	43	thursday	Mülhauserstrasse	2.61078e+06	1.26877e+06	functioning	undefined	0	0	0	0	14.5	7.2
140	2	2024-10-24	43	thursday	Flughafenstrasse	2.60986e+06	1.26876e+06	functioning	aedes	0	0	0	0	14.5	7.2
140	2	2024-10-24	43	thursday	Flughafenstrasse	2.60986e+06	1.26876e+06	functioning	chironomidae	0	0	0	0	14.5	7.2
140	2	2024-10-24	43	thursday	Flughafenstrasse	2.60986e+06	1.26876e+06	functioning	culex	0	0	0	0	14.5	7.2
140	2	2024-10-24	43	thursday	Flughafenstrasse	2.60986e+06	1.26876e+06	functioning	psychodidae	0	0	0	0	14.5	7.2
140	2	2024-10-24	43	thursday	Flughafenstrasse	2.60986e+06	1.26876e+06	functioning	undefined	0	0	0	0	14.5	7.2
83	2	2024-10-24	43	thursday	Lothringerstrasse	2.61039e+06	1.26872e+06	functioning	aedes	0	0	0	0	14.5	7.2
83	2	2024-10-24	43	thursday	Lothringerstrasse	2.61039e+06	1.26872e+06	functioning	chironomidae	0	0	0	0	14.5	7.2
83	2	2024-10-24	43	thursday	Lothringerstrasse	2.61039e+06	1.26872e+06	functioning	culex	0	0	0	0	14.5	7.2
83	2	2024-10-24	43	thursday	Lothringerstrasse	2.61039e+06	1.26872e+06	functioning	psychodidae	0	0	0	0	14.5	7.2
83	2	2024-10-24	43	thursday	Lothringerstrasse	2.61039e+06	1.26872e+06	functioning	undefined	0	0	0	0	14.5	7.2
85	2	2024-10-24	43	thursday	Lothringerstrasse	2.61038e+06	1.26872e+06	functioning	aedes	0	0	0	0	14.5	7.2
85	2	2024-10-24	43	thursday	Lothringerstrasse	2.61038e+06	1.26872e+06	functioning	chironomidae	0	0	0	0	14.5	7.2
85	2	2024-10-24	43	thursday	Lothringerstrasse	2.61038e+06	1.26872e+06	functioning	culex	0	0	0	0	14.5	7.2
85	2	2024-10-24	43	thursday	Lothringerstrasse	2.61038e+06	1.26872e+06	functioning	psychodidae	0	0	0	0	14.5	7.2
85	2	2024-10-24	43	thursday	Lothringerstrasse	2.61038e+06	1.26872e+06	functioning	undefined	0	0	0	0	14.5	7.2
107	8	2024-10-24	43	thursday	Vogesenstrasse	2.61026e+06	1.2687e+06	functioning	aedes	0	0	0	0	14.5	7.2
107	8	2024-10-24	43	thursday	Vogesenstrasse	2.61026e+06	1.2687e+06	functioning	chironomidae	0	0	0	0	14.5	7.2
107	8	2024-10-24	43	thursday	Vogesenstrasse	2.61026e+06	1.2687e+06	functioning	culex	0	0	0	0	14.5	7.2
107	8	2024-10-24	43	thursday	Vogesenstrasse	2.61026e+06	1.2687e+06	functioning	psychodidae	0	0	0	0	14.5	7.2
107	8	2024-10-24	43	thursday	Vogesenstrasse	2.61026e+06	1.2687e+06	functioning	undefined	0	0	0	0	14.5	7.2
33	4	2024-10-24	43	thursday	Mülhauserstrasse	2.61069e+06	1.26869e+06	functioning	aedes	0	0	0	0	14.5	7.2
33	4	2024-10-24	43	thursday	Mülhauserstrasse	2.61069e+06	1.26869e+06	functioning	chironomidae	0	0	0	0	14.5	7.2
33	4	2024-10-24	43	thursday	Mülhauserstrasse	2.61069e+06	1.26869e+06	functioning	culex	0	0	0	0	14.5	7.2
33	4	2024-10-24	43	thursday	Mülhauserstrasse	2.61069e+06	1.26869e+06	functioning	psychodidae	0	0	0	0	14.5	7.2
33	4	2024-10-24	43	thursday	Mülhauserstrasse	2.61069e+06	1.26869e+06	functioning	undefined	0	0	0	0	14.5	7.2
67	4	2024-10-24	43	thursday	Landskronstrasse	2.61045e+06	1.26867e+06	functioning	aedes	0	0	0	0	14.5	7.2
67	4	2024-10-24	43	thursday	Landskronstrasse	2.61045e+06	1.26867e+06	functioning	chironomidae	0	0	0	0	14.5	7.2
67	4	2024-10-24	43	thursday	Landskronstrasse	2.61045e+06	1.26867e+06	functioning	culex	0	0	0	0	14.5	7.2
67	4	2024-10-24	43	thursday	Landskronstrasse	2.61045e+06	1.26867e+06	functioning	psychodidae	0	0	0	0	14.5	7.2
67	4	2024-10-24	43	thursday	Landskronstrasse	2.61045e+06	1.26867e+06	functioning	undefined	0	0	0	0	14.5	7.2
164	8	2024-10-24	43	thursday	Gustav Wenk-Strasse	2.60969e+06	1.26866e+06	functioning	chironomidae	14	11	0	14	14.5	7.2
164	8	2024-10-24	43	thursday	Gustav Wenk-Strasse	2.60969e+06	1.26866e+06	functioning	aedes	0	0	0	0	14.5	7.2
164	8	2024-10-24	43	thursday	Gustav Wenk-Strasse	2.60969e+06	1.26866e+06	functioning	culex	0	0	0	0	14.5	7.2
164	8	2024-10-24	43	thursday	Gustav Wenk-Strasse	2.60969e+06	1.26866e+06	functioning	psychodidae	0	0	0	0	14.5	7.2
164	8	2024-10-24	43	thursday	Gustav Wenk-Strasse	2.60969e+06	1.26866e+06	functioning	undefined	0	0	0	0	14.5	7.2
58	2	2024-10-24	43	thursday	Ryffstrasse	2.61051e+06	1.26864e+06	functioning	chironomidae	1	1	0	1	14.5	7.2
58	2	2024-10-24	43	thursday	Ryffstrasse	2.61051e+06	1.26864e+06	functioning	aedes	0	0	0	0	14.5	7.2
58	2	2024-10-24	43	thursday	Ryffstrasse	2.61051e+06	1.26864e+06	functioning	culex	0	0	0	0	14.5	7.2
58	2	2024-10-24	43	thursday	Ryffstrasse	2.61051e+06	1.26864e+06	functioning	psychodidae	0	0	0	0	14.5	7.2
58	2	2024-10-24	43	thursday	Ryffstrasse	2.61051e+06	1.26864e+06	functioning	undefined	0	0	0	0	14.5	7.2
151	4	2024-10-24	43	thursday	Lachenstrasse	2.60981e+06	1.26864e+06	functioning	chironomidae	1	1	0	1	14.5	7.2
151	4	2024-10-24	43	thursday	Lachenstrasse	2.60981e+06	1.26864e+06	functioning	aedes	0	0	0	0	14.5	7.2
151	4	2024-10-24	43	thursday	Lachenstrasse	2.60981e+06	1.26864e+06	functioning	culex	0	0	0	0	14.5	7.2
151	4	2024-10-24	43	thursday	Lachenstrasse	2.60981e+06	1.26864e+06	functioning	psychodidae	0	0	0	0	14.5	7.2
151	4	2024-10-24	43	thursday	Lachenstrasse	2.60981e+06	1.26864e+06	functioning	undefined	0	0	0	0	14.5	7.2
28	4	2024-10-24	43	thursday	St. Johanns-Park	2.61071e+06	1.26863e+06	functioning	aedes	0	0	0	0	14.5	7.2
28	4	2024-10-24	43	thursday	St. Johanns-Park	2.61071e+06	1.26863e+06	functioning	chironomidae	0	0	0	0	14.5	7.2
28	4	2024-10-24	43	thursday	St. Johanns-Park	2.61071e+06	1.26863e+06	functioning	culex	0	0	0	0	14.5	7.2
28	4	2024-10-24	43	thursday	St. Johanns-Park	2.61071e+06	1.26863e+06	functioning	psychodidae	0	0	0	0	14.5	7.2
28	4	2024-10-24	43	thursday	St. Johanns-Park	2.61071e+06	1.26863e+06	functioning	undefined	0	0	0	0	14.5	7.2
160	2	2024-10-24	43	tuesday	Septerstrasse	2.60976e+06	1.26858e+06	functioning	aedes	0	0	0	0	14.5	7.2	24.10 instead 21.10
160	2	2024-10-24	43	tuesday	Septerstrasse	2.60976e+06	1.26858e+06	functioning	chironomidae	0	0	0	0	14.5	7.2	24.10 instead 21.10
160	2	2024-10-24	43	tuesday	Septerstrasse	2.60976e+06	1.26858e+06	functioning	culex	0	0	0	0	14.5	7.2	24.10 instead 21.10
160	2	2024-10-24	43	tuesday	Septerstrasse	2.60976e+06	1.26858e+06	functioning	psychodidae	0	0	0	0	14.5	7.2	24.10 instead 21.10
160	2	2024-10-24	43	tuesday	Septerstrasse	2.60976e+06	1.26858e+06	functioning	undefined	0	0	0	0	14.5	7.2	24.10 instead 21.10
161	10	2024-10-24	43	thursday	Dammerkirchstrasse	2.60975e+06	1.26858e+06	functioning	chironomidae	4	0	0	4	14.5	7.2
161	10	2024-10-24	43	thursday	Dammerkirchstrasse	2.60975e+06	1.26858e+06	functioning	aedes	0	0	0	0	14.5	7.2
161	10	2024-10-24	43	thursday	Dammerkirchstrasse	2.60975e+06	1.26858e+06	functioning	culex	0	0	0	0	14.5	7.2
161	10	2024-10-24	43	thursday	Dammerkirchstrasse	2.60975e+06	1.26858e+06	functioning	psychodidae	0	0	0	0	14.5	7.2
161	10	2024-10-24	43	thursday	Dammerkirchstrasse	2.60975e+06	1.26858e+06	functioning	undefined	0	0	0	0	14.5	7.2
88	0	2024-10-24	43	thursday	Vogesenstrasse	2.61037e+06	1.26858e+06	nonfunctioning						14.5	7.2	fell over
61	0	2024-10-24	43	thursday	Mülhauserstrasse	2.61049e+06	1.26855e+06	functioning	aedes	0	0	0	0	14.5	7.2
61	0	2024-10-24	43	thursday	Mülhauserstrasse	2.61049e+06	1.26855e+06	functioning	chironomidae	0	0	0	0	14.5	7.2
61	0	2024-10-24	43	thursday	Mülhauserstrasse	2.61049e+06	1.26855e+06	functioning	culex	0	0	0	0	14.5	7.2
61	0	2024-10-24	43	thursday	Mülhauserstrasse	2.61049e+06	1.26855e+06	functioning	psychodidae	0	0	0	0	14.5	7.2
61	0	2024-10-24	43	thursday	Mülhauserstrasse	2.61049e+06	1.26855e+06	functioning	undefined	0	0	0	0	14.5	7.2
105	0	2024-10-24	43	thursday	Davidsbodenstrasse	2.61028e+06	1.2685e+06	functioning	chironomidae	7	0	5	7	14.5	7.2
105	0	2024-10-24	43	thursday	Davidsbodenstrasse	2.61028e+06	1.2685e+06	functioning	undefined	2	0	2	2	14.5	7.2
105	0	2024-10-24	43	thursday	Davidsbodenstrasse	2.61028e+06	1.2685e+06	functioning	aedes	0	0	0	0	14.5	7.2
105	0	2024-10-24	43	thursday	Davidsbodenstrasse	2.61028e+06	1.2685e+06	functioning	culex	0	0	0	0	14.5	7.2
105	0	2024-10-24	43	thursday	Davidsbodenstrasse	2.61028e+06	1.2685e+06	functioning	psychodidae	0	0	0	0	14.5	7.2
148	4	2024-10-24	43	thursday	Glaserbergstrasse	2.60982e+06	1.26846e+06	functioning	chironomidae	34	16	0	34	14.5	7.2
148	4	2024-10-24	43	thursday	Glaserbergstrasse	2.60982e+06	1.26846e+06	functioning	aedes	0	0	0	0	14.5	7.2
148	4	2024-10-24	43	thursday	Glaserbergstrasse	2.60982e+06	1.26846e+06	functioning	culex	0	0	0	0	14.5	7.2
148	4	2024-10-24	43	thursday	Glaserbergstrasse	2.60982e+06	1.26846e+06	functioning	psychodidae	0	0	0	0	14.5	7.2
148	4	2024-10-24	43	thursday	Glaserbergstrasse	2.60982e+06	1.26846e+06	functioning	undefined	0	0	0	0	14.5	7.2
31	6	2024-10-24	43	thursday	St. Johanns-Platz	2.6107e+06	1.26846e+06	functioning	aedes	0	0	0	0	14.5	7.2
31	6	2024-10-24	43	thursday	St. Johanns-Platz	2.6107e+06	1.26846e+06	functioning	chironomidae	0	0	0	0	14.5	7.2
31	6	2024-10-24	43	thursday	St. Johanns-Platz	2.6107e+06	1.26846e+06	functioning	culex	0	0	0	0	14.5	7.2
31	6	2024-10-24	43	thursday	St. Johanns-Platz	2.6107e+06	1.26846e+06	functioning	psychodidae	0	0	0	0	14.5	7.2
31	6	2024-10-24	43	thursday	St. Johanns-Platz	2.6107e+06	1.26846e+06	functioning	undefined	0	0	0	0	14.5	7.2
40	4	2024-10-24	43	thursday	Immengasse	2.61065e+06	1.26843e+06	functioning	aedes	0	0	0	0	14.5	7.2
40	4	2024-10-24	43	thursday	Immengasse	2.61065e+06	1.26843e+06	functioning	chironomidae	0	0	0	0	14.5	7.2
40	4	2024-10-24	43	thursday	Immengasse	2.61065e+06	1.26843e+06	functioning	culex	0	0	0	0	14.5	7.2
40	4	2024-10-24	43	thursday	Immengasse	2.61065e+06	1.26843e+06	functioning	psychodidae	0	0	0	0	14.5	7.2
40	4	2024-10-24	43	thursday	Immengasse	2.61065e+06	1.26843e+06	functioning	undefined	0	0	0	0	14.5	7.2
62	4	2024-10-24	43	thursday	Vogesenstrasse	2.61048e+06	1.26842e+06	functioning	chironomidae	3	2	0	3	14.5	7.2
62	4	2024-10-24	43	thursday	Vogesenstrasse	2.61048e+06	1.26842e+06	functioning	aedes	0	0	0	0	14.5	7.2
62	4	2024-10-24	43	thursday	Vogesenstrasse	2.61048e+06	1.26842e+06	functioning	culex	0	0	0	0	14.5	7.2
62	4	2024-10-24	43	thursday	Vogesenstrasse	2.61048e+06	1.26842e+06	functioning	psychodidae	0	0	0	0	14.5	7.2
62	4	2024-10-24	43	thursday	Vogesenstrasse	2.61048e+06	1.26842e+06	functioning	undefined	0	0	0	0	14.5	7.2
44	0	2024-10-24	43	thursday	Lothringerstrasse	2.61062e+06	1.26838e+06	functioning	chironomidae	1	1	0	1	14.5	7.2
44	0	2024-10-24	43	thursday	Lothringerstrasse	2.61062e+06	1.26838e+06	functioning	aedes	0	0	0	0	14.5	7.2
44	0	2024-10-24	43	thursday	Lothringerstrasse	2.61062e+06	1.26838e+06	functioning	culex	0	0	0	0	14.5	7.2
44	0	2024-10-24	43	thursday	Lothringerstrasse	2.61062e+06	1.26838e+06	functioning	psychodidae	0	0	0	0	14.5	7.2
44	0	2024-10-24	43	thursday	Lothringerstrasse	2.61062e+06	1.26838e+06	functioning	undefined	0	0	0	0	14.5	7.2
11	8	2024-10-24	43	thursday	St. Johanns-Vorstadt	2.61087e+06	1.26833e+06	functioning	aedes	0	0	0	0	14.5	7.2
11	8	2024-10-24	43	thursday	St. Johanns-Vorstadt	2.61087e+06	1.26833e+06	functioning	chironomidae	0	0	0	0	14.5	7.2
11	8	2024-10-24	43	thursday	St. Johanns-Vorstadt	2.61087e+06	1.26833e+06	functioning	culex	0	0	0	0	14.5	7.2
11	8	2024-10-24	43	thursday	St. Johanns-Vorstadt	2.61087e+06	1.26833e+06	functioning	psychodidae	0	0	0	0	14.5	7.2
11	8	2024-10-24	43	thursday	St. Johanns-Vorstadt	2.61087e+06	1.26833e+06	functioning	undefined	0	0	0	0	14.5	7.2
8	4	2024-10-24	43	thursday	St. Johanns-Rheinweg	2.61091e+06	1.26832e+06	functioning	aedes	0	0	0	0	14.5	7.2
8	4	2024-10-24	43	thursday	St. Johanns-Rheinweg	2.61091e+06	1.26832e+06	functioning	chironomidae	0	0	0	0	14.5	7.2
8	4	2024-10-24	43	thursday	St. Johanns-Rheinweg	2.61091e+06	1.26832e+06	functioning	culex	0	0	0	0	14.5	7.2
8	4	2024-10-24	43	thursday	St. Johanns-Rheinweg	2.61091e+06	1.26832e+06	functioning	psychodidae	0	0	0	0	14.5	7.2
8	4	2024-10-24	43	thursday	St. Johanns-Rheinweg	2.61091e+06	1.26832e+06	functioning	undefined	0	0	0	0	14.5	7.2
93	0	2024-10-24	43	thursday	Hebelplatz	2.61035e+06	1.26824e+06	functioning	psychodidae	5	0	5	5	14.5	7.2
93	0	2024-10-24	43	thursday	Hebelplatz	2.61035e+06	1.26824e+06	functioning	aedes	0	0	0	0	14.5	7.2
93	0	2024-10-24	43	thursday	Hebelplatz	2.61035e+06	1.26824e+06	functioning	chironomidae	0	0	0	0	14.5	7.2
93	0	2024-10-24	43	thursday	Hebelplatz	2.61035e+06	1.26824e+06	functioning	culex	0	0	0	0	14.5	7.2
93	0	2024-10-24	43	thursday	Hebelplatz	2.61035e+06	1.26824e+06	functioning	undefined	0	0	0	0	14.5	7.2
63	6	2024-10-24	43	thursday	St. Johanns-Ring	2.61048e+06	1.26823e+06	functioning	aedes	0	0	0	0	14.5	7.2
63	6	2024-10-24	43	thursday	St. Johanns-Ring	2.61048e+06	1.26823e+06	functioning	chironomidae	0	0	0	0	14.5	7.2
63	6	2024-10-24	43	thursday	St. Johanns-Ring	2.61048e+06	1.26823e+06	functioning	culex	0	0	0	0	14.5	7.2
63	6	2024-10-24	43	thursday	St. Johanns-Ring	2.61048e+06	1.26823e+06	functioning	psychodidae	0	0	0	0	14.5	7.2
63	6	2024-10-24	43	thursday	St. Johanns-Ring	2.61048e+06	1.26823e+06	functioning	undefined	0	0	0	0	14.5	7.2
114	10	2024-10-24	43	thursday	Sommergasse	2.61018e+06	1.2682e+06	functioning	aedes	0	0	0	0	14.5	7.2
114	10	2024-10-24	43	thursday	Sommergasse	2.61018e+06	1.2682e+06	functioning	chironomidae	0	0	0	0	14.5	7.2
114	10	2024-10-24	43	thursday	Sommergasse	2.61018e+06	1.2682e+06	functioning	culex	0	0	0	0	14.5	7.2
114	10	2024-10-24	43	thursday	Sommergasse	2.61018e+06	1.2682e+06	functioning	psychodidae	0	0	0	0	14.5	7.2
114	10	2024-10-24	43	thursday	Sommergasse	2.61018e+06	1.2682e+06	functioning	undefined	0	0	0	0	14.5	7.2
81	8	2024-10-24	43	thursday	St. Johanns-Ring	2.61039e+06	1.26812e+06	functioning	culex	2	1	0	2	14.5	7.2
81	8	2024-10-24	43	thursday	St. Johanns-Ring	2.61039e+06	1.26812e+06	functioning	aedes	0	0	0	0	14.5	7.2
81	8	2024-10-24	43	thursday	St. Johanns-Ring	2.61039e+06	1.26812e+06	functioning	chironomidae	0	0	0	0	14.5	7.2
81	8	2024-10-24	43	thursday	St. Johanns-Ring	2.61039e+06	1.26812e+06	functioning	psychodidae	0	0	0	0	14.5	7.2
81	8	2024-10-24	43	thursday	St. Johanns-Ring	2.61039e+06	1.26812e+06	functioning	undefined	0	0	0	0	14.5	7.2
117	10	2024-10-24	43	thursday	Kannenfeldstrasse	2.61016e+06	1.2681e+06	functioning	chironomidae	8	5	0	8	14.5	7.2
117	10	2024-10-24	43	thursday	Kannenfeldstrasse	2.61016e+06	1.2681e+06	functioning	psychodidae	1	0	1	1	14.5	7.2
117	10	2024-10-24	43	thursday	Kannenfeldstrasse	2.61016e+06	1.2681e+06	functioning	aedes	0	0	0	0	14.5	7.2
117	10	2024-10-24	43	thursday	Kannenfeldstrasse	2.61016e+06	1.2681e+06	functioning	culex	0	0	0	0	14.5	7.2
117	10	2024-10-24	43	thursday	Kannenfeldstrasse	2.61016e+06	1.2681e+06	functioning	undefined	0	0	0	0	14.5	7.2
90	8	2024-10-24	43	thursday	Mittlere Strasse	2.61037e+06	1.26807e+06	functioning	chironomidae	1	0	0	1	14.5	7.2
90	8	2024-10-24	43	thursday	Mittlere Strasse	2.61037e+06	1.26807e+06	functioning	aedes	0	0	0	0	14.5	7.2
90	8	2024-10-24	43	thursday	Mittlere Strasse	2.61037e+06	1.26807e+06	functioning	culex	0	0	0	0	14.5	7.2
90	8	2024-10-24	43	thursday	Mittlere Strasse	2.61037e+06	1.26807e+06	functioning	psychodidae	0	0	0	0	14.5	7.2
90	8	2024-10-24	43	thursday	Mittlere Strasse	2.61037e+06	1.26807e+06	functioning	undefined	0	0	0	0	14.5	7.2
53	8	2024-10-24	43	thursday	Mittlere Strasse	2.61053e+06	1.26783e+06	functioning	aedes	0	0	0	0	14.5	7.2
53	8	2024-10-24	43	thursday	Mittlere Strasse	2.61053e+06	1.26783e+06	functioning	chironomidae	0	0	0	0	14.5	7.2
53	8	2024-10-24	43	thursday	Mittlere Strasse	2.61053e+06	1.26783e+06	functioning	culex	0	0	0	0	14.5	7.2
53	8	2024-10-24	43	thursday	Mittlere Strasse	2.61053e+06	1.26783e+06	functioning	psychodidae	0	0	0	0	14.5	7.2
53	8	2024-10-24	43	thursday	Mittlere Strasse	2.61053e+06	1.26783e+06	functioning	undefined	0	0	0	0	14.5	7.2
45	6	2024-10-24	43	thursday	Mittlere Strasse	2.61062e+06	1.26774e+06	functioning	aedes	0	0	0	0	14.5	7.2
45	6	2024-10-24	43	thursday	Mittlere Strasse	2.61062e+06	1.26774e+06	functioning	chironomidae	0	0	0	0	14.5	7.2
45	6	2024-10-24	43	thursday	Mittlere Strasse	2.61062e+06	1.26774e+06	functioning	culex	0	0	0	0	14.5	7.2
45	6	2024-10-24	43	thursday	Mittlere Strasse	2.61062e+06	1.26774e+06	functioning	psychodidae	0	0	0	0	14.5	7.2
45	6	2024-10-24	43	thursday	Mittlere Strasse	2.61062e+06	1.26774e+06	functioning	undefined	0	0	0	0	14.5	7.2
130	2	2024-10-10	41	thursday	Schlachthofstrasse	2.61001e+06	1.26953e+06	functioning	aedes	0	0	0	0	15.8	5.2
130	2	2024-10-10	41	thursday	Schlachthofstrasse	2.61001e+06	1.26953e+06	functioning	chironomidae	0	0	0	0	15.8	5.2
130	2	2024-10-10	41	thursday	Schlachthofstrasse	2.61001e+06	1.26953e+06	functioning	culex	0	0	0	0	15.8	5.2
130	2	2024-10-10	41	thursday	Schlachthofstrasse	2.61001e+06	1.26953e+06	functioning	psychodidae	0	0	0	0	15.8	5.2
130	2	2024-10-10	41	thursday	Schlachthofstrasse	2.61001e+06	1.26953e+06	functioning	undefined	0	0	0	0	15.8	5.2
172	2	2024-10-10	41	thursday	Neudorfstrasse	2.60952e+06	1.26945e+06	functioning	aedes	0	0	0	0	15.8	5.2
172	2	2024-10-10	41	thursday	Neudorfstrasse	2.60952e+06	1.26945e+06	functioning	chironomidae	0	0	0	0	15.8	5.2
172	2	2024-10-10	41	thursday	Neudorfstrasse	2.60952e+06	1.26945e+06	functioning	culex	0	0	0	0	15.8	5.2
172	2	2024-10-10	41	thursday	Neudorfstrasse	2.60952e+06	1.26945e+06	functioning	psychodidae	0	0	0	0	15.8	5.2
172	2	2024-10-10	41	thursday	Neudorfstrasse	2.60952e+06	1.26945e+06	functioning	undefined	0	0	0	0	15.8	5.2
102	0	2024-10-10	41	thursday	Kohlenstrasse	2.61028e+06	1.26944e+06	functioning	chironomidae	1	0	0	1	15.8	5.2
102	0	2024-10-10	41	thursday	Kohlenstrasse	2.61028e+06	1.26944e+06	functioning	aedes	0	0	0	0	15.8	5.2
102	0	2024-10-10	41	thursday	Kohlenstrasse	2.61028e+06	1.26944e+06	functioning	culex	0	0	0	0	15.8	5.2
102	0	2024-10-10	41	thursday	Kohlenstrasse	2.61028e+06	1.26944e+06	functioning	psychodidae	0	0	0	0	15.8	5.2
102	0	2024-10-10	41	thursday	Kohlenstrasse	2.61028e+06	1.26944e+06	functioning	undefined	0	0	0	0	15.8	5.2
146	10	2024-10-10	41	thursday	Hagenaustrasse	2.60983e+06	1.26923e+06	functioning	chironomidae	1	0	0	1	15.8	5.2
146	10	2024-10-10	41	thursday	Hagenaustrasse	2.60983e+06	1.26923e+06	functioning	aedes	0	0	0	0	15.8	5.2
146	10	2024-10-10	41	thursday	Hagenaustrasse	2.60983e+06	1.26923e+06	functioning	culex	0	0	0	0	15.8	5.2
146	10	2024-10-10	41	thursday	Hagenaustrasse	2.60983e+06	1.26923e+06	functioning	psychodidae	0	0	0	0	15.8	5.2
146	10	2024-10-10	41	thursday	Hagenaustrasse	2.60983e+06	1.26923e+06	functioning	undefined	0	0	0	0	15.8	5.2
175	6	2024-10-10	41	thursday	Friedrich Miescher-Strasse	2.60946e+06	1.26921e+06	functioning	aedes	0	0	0	0	15.8	5.2
175	6	2024-10-10	41	thursday	Friedrich Miescher-Strasse	2.60946e+06	1.26921e+06	functioning	chironomidae	0	0	0	0	15.8	5.2
175	6	2024-10-10	41	thursday	Friedrich Miescher-Strasse	2.60946e+06	1.26921e+06	functioning	culex	0	0	0	0	15.8	5.2
175	6	2024-10-10	41	thursday	Friedrich Miescher-Strasse	2.60946e+06	1.26921e+06	functioning	psychodidae	0	0	0	0	15.8	5.2
175	6	2024-10-10	41	thursday	Friedrich Miescher-Strasse	2.60946e+06	1.26921e+06	functioning	undefined	0	0	0	0	15.8	5.2
142	2	2024-10-10	41	thursday	Hagenaustrasse	2.60986e+06	1.26916e+06	functioning	aedes	0	0	0	0	15.8	5.2
142	2	2024-10-10	41	thursday	Hagenaustrasse	2.60986e+06	1.26916e+06	functioning	chironomidae	0	0	0	0	15.8	5.2
142	2	2024-10-10	41	thursday	Hagenaustrasse	2.60986e+06	1.26916e+06	functioning	culex	0	0	0	0	15.8	5.2
142	2	2024-10-10	41	thursday	Hagenaustrasse	2.60986e+06	1.26916e+06	functioning	psychodidae	0	0	0	0	15.8	5.2
142	2	2024-10-10	41	thursday	Hagenaustrasse	2.60986e+06	1.26916e+06	functioning	undefined	0	0	0	0	15.8	5.2
162	8	2024-10-10	41	thursday	Neudorfstrasse	2.60975e+06	1.26908e+06	functioning	psychodidae	2	0	2	2	15.8	5.2
162	8	2024-10-10	41	thursday	Neudorfstrasse	2.60975e+06	1.26908e+06	functioning	aedes	0	0	0	0	15.8	5.2
162	8	2024-10-10	41	thursday	Neudorfstrasse	2.60975e+06	1.26908e+06	functioning	chironomidae	0	0	0	0	15.8	5.2
162	8	2024-10-10	41	thursday	Neudorfstrasse	2.60975e+06	1.26908e+06	functioning	culex	0	0	0	0	15.8	5.2
162	8	2024-10-10	41	thursday	Neudorfstrasse	2.60975e+06	1.26908e+06	functioning	undefined	0	0	0	0	15.8	5.2
144	0	2024-10-10	41	thursday	Hagenaustrasse	2.60984e+06	1.26905e+06	functioning	chironomidae	19	11	0	19	15.8	5.2
144	0	2024-10-10	41	thursday	Hagenaustrasse	2.60984e+06	1.26905e+06	functioning	undefined	1	0	1	1	15.8	5.2
144	0	2024-10-10	41	thursday	Hagenaustrasse	2.60984e+06	1.26905e+06	functioning	aedes	0	0	0	0	15.8	5.2
144	0	2024-10-10	41	thursday	Hagenaustrasse	2.60984e+06	1.26905e+06	functioning	culex	0	0	0	0	15.8	5.2
144	0	2024-10-10	41	thursday	Hagenaustrasse	2.60984e+06	1.26905e+06	functioning	psychodidae	0	0	0	0	15.8	5.2
100	10	2024-10-10	41	thursday	Beckenstrasse	2.6103e+06	1.26904e+06	nonfunctioning						15.8	5.2	fell over
106	10	2024-10-10	41	thursday	Hüningerstrasse	2.61027e+06	1268969	functioning	aedes	0	0	0	0	15.8	5.2
106	10	2024-10-10	41	thursday	Hüningerstrasse	2.61027e+06	1268969	functioning	chironomidae	0	0	0	0	15.8	5.2
106	10	2024-10-10	41	thursday	Hüningerstrasse	2.61027e+06	1268969	functioning	culex	0	0	0	0	15.8	5.2
106	10	2024-10-10	41	thursday	Hüningerstrasse	2.61027e+06	1268969	functioning	psychodidae	0	0	0	0	15.8	5.2
106	10	2024-10-10	41	thursday	Hüningerstrasse	2.61027e+06	1268969	functioning	undefined	0	0	0	0	15.8	5.2
137	6	2024-10-10	41	thursday	Im Wasenboden	2.60992e+06	1.2689e+06	functioning	psychodidae	2	0	2	2	15.8	5.2
137	6	2024-10-10	41	thursday	Im Wasenboden	2.60992e+06	1.2689e+06	functioning	chironomidae	1	1	0	1	15.8	5.2
137	6	2024-10-10	41	thursday	Im Wasenboden	2.60992e+06	1.2689e+06	functioning	aedes	0	0	0	0	15.8	5.2
137	6	2024-10-10	41	thursday	Im Wasenboden	2.60992e+06	1.2689e+06	functioning	culex	0	0	0	0	15.8	5.2
137	6	2024-10-10	41	thursday	Im Wasenboden	2.60992e+06	1.2689e+06	functioning	undefined	0	0	0	0	15.8	5.2
118	10	2024-10-10	41	thursday	Entenweidstrasse	2.61014e+06	1.26878e+06	functioning	aedes	0	0	0	0	15.8	5.2
118	10	2024-10-10	41	thursday	Entenweidstrasse	2.61014e+06	1.26878e+06	functioning	chironomidae	0	0	0	0	15.8	5.2
118	10	2024-10-10	41	thursday	Entenweidstrasse	2.61014e+06	1.26878e+06	functioning	culex	0	0	0	0	15.8	5.2
118	10	2024-10-10	41	thursday	Entenweidstrasse	2.61014e+06	1.26878e+06	functioning	psychodidae	0	0	0	0	15.8	5.2
118	10	2024-10-10	41	thursday	Entenweidstrasse	2.61014e+06	1.26878e+06	functioning	undefined	0	0	0	0	15.8	5.2
16	4	2024-10-10	41	thursday	Elsässerrheinweg	2.61084e+06	1.26877e+06	functioning	aedes	0	0	0	0	15.8	5.2
16	4	2024-10-10	41	thursday	Elsässerrheinweg	2.61084e+06	1.26877e+06	functioning	chironomidae	0	0	0	0	15.8	5.2
16	4	2024-10-10	41	thursday	Elsässerrheinweg	2.61084e+06	1.26877e+06	functioning	culex	0	0	0	0	15.8	5.2
16	4	2024-10-10	41	thursday	Elsässerrheinweg	2.61084e+06	1.26877e+06	functioning	psychodidae	0	0	0	0	15.8	5.2
16	4	2024-10-10	41	thursday	Elsässerrheinweg	2.61084e+06	1.26877e+06	functioning	undefined	0	0	0	0	15.8	5.2
21	0	2024-10-10	41	thursday	Mülhauserstrasse	2.61078e+06	1.26877e+06	functioning	aedes	0	0	0	0	15.8	5.2
21	0	2024-10-10	41	thursday	Mülhauserstrasse	2.61078e+06	1.26877e+06	functioning	chironomidae	0	0	0	0	15.8	5.2
21	0	2024-10-10	41	thursday	Mülhauserstrasse	2.61078e+06	1.26877e+06	functioning	culex	0	0	0	0	15.8	5.2
21	0	2024-10-10	41	thursday	Mülhauserstrasse	2.61078e+06	1.26877e+06	functioning	psychodidae	0	0	0	0	15.8	5.2
21	0	2024-10-10	41	thursday	Mülhauserstrasse	2.61078e+06	1.26877e+06	functioning	undefined	0	0	0	0	15.8	5.2
140	2	2024-10-10	41	thursday	Flughafenstrasse	2.60986e+06	1.26876e+06	functioning	aedes	0	0	0	0	15.8	5.2
140	2	2024-10-10	41	thursday	Flughafenstrasse	2.60986e+06	1.26876e+06	functioning	chironomidae	0	0	0	0	15.8	5.2
140	2	2024-10-10	41	thursday	Flughafenstrasse	2.60986e+06	1.26876e+06	functioning	culex	0	0	0	0	15.8	5.2
140	2	2024-10-10	41	thursday	Flughafenstrasse	2.60986e+06	1.26876e+06	functioning	psychodidae	0	0	0	0	15.8	5.2
140	2	2024-10-10	41	thursday	Flughafenstrasse	2.60986e+06	1.26876e+06	functioning	undefined	0	0	0	0	15.8	5.2
83	2	2024-10-10	41	thursday	Lothringerstrasse	2.61039e+06	1.26872e+06	functioning	aedes	0	0	0	0	15.8	5.2
83	2	2024-10-10	41	thursday	Lothringerstrasse	2.61039e+06	1.26872e+06	functioning	chironomidae	0	0	0	0	15.8	5.2
83	2	2024-10-10	41	thursday	Lothringerstrasse	2.61039e+06	1.26872e+06	functioning	culex	0	0	0	0	15.8	5.2
83	2	2024-10-10	41	thursday	Lothringerstrasse	2.61039e+06	1.26872e+06	functioning	psychodidae	0	0	0	0	15.8	5.2
83	2	2024-10-10	41	thursday	Lothringerstrasse	2.61039e+06	1.26872e+06	functioning	undefined	0	0	0	0	15.8	5.2
85	2	2024-10-10	41	thursday	Lothringerstrasse	2.61038e+06	1.26872e+06	functioning	aedes	0	0	0	0	15.8	5.2
85	2	2024-10-10	41	thursday	Lothringerstrasse	2.61038e+06	1.26872e+06	functioning	chironomidae	0	0	0	0	15.8	5.2
85	2	2024-10-10	41	thursday	Lothringerstrasse	2.61038e+06	1.26872e+06	functioning	culex	0	0	0	0	15.8	5.2
85	2	2024-10-10	41	thursday	Lothringerstrasse	2.61038e+06	1.26872e+06	functioning	psychodidae	0	0	0	0	15.8	5.2
85	2	2024-10-10	41	thursday	Lothringerstrasse	2.61038e+06	1.26872e+06	functioning	undefined	0	0	0	0	15.8	5.2
107	8	2024-10-10	41	thursday	Vogesenstrasse	2.61026e+06	1.2687e+06	functioning	chironomidae	3	2	0	3	15.8	5.2
107	8	2024-10-10	41	thursday	Vogesenstrasse	2.61026e+06	1.2687e+06	functioning	aedes	1	0	0	1	15.8	5.2
107	8	2024-10-10	41	thursday	Vogesenstrasse	2.61026e+06	1.2687e+06	functioning	culex	0	0	0	0	15.8	5.2
107	8	2024-10-10	41	thursday	Vogesenstrasse	2.61026e+06	1.2687e+06	functioning	psychodidae	0	0	0	0	15.8	5.2
107	8	2024-10-10	41	thursday	Vogesenstrasse	2.61026e+06	1.2687e+06	functioning	undefined	0	0	0	0	15.8	5.2
33	4	2024-10-10	41	thursday	Mülhauserstrasse	2.61069e+06	1.26869e+06	functioning	aedes	0	0	0	0	15.8	5.2
33	4	2024-10-10	41	thursday	Mülhauserstrasse	2.61069e+06	1.26869e+06	functioning	chironomidae	0	0	0	0	15.8	5.2
33	4	2024-10-10	41	thursday	Mülhauserstrasse	2.61069e+06	1.26869e+06	functioning	culex	0	0	0	0	15.8	5.2
33	4	2024-10-10	41	thursday	Mülhauserstrasse	2.61069e+06	1.26869e+06	functioning	psychodidae	0	0	0	0	15.8	5.2
33	4	2024-10-10	41	thursday	Mülhauserstrasse	2.61069e+06	1.26869e+06	functioning	undefined	0	0	0	0	15.8	5.2
67	4	2024-10-10	41	thursday	Landskronstrasse	2.61045e+06	1.26867e+06	functioning	aedes	0	0	0	0	15.8	5.2
67	4	2024-10-10	41	thursday	Landskronstrasse	2.61045e+06	1.26867e+06	functioning	chironomidae	0	0	0	0	15.8	5.2
67	4	2024-10-10	41	thursday	Landskronstrasse	2.61045e+06	1.26867e+06	functioning	culex	0	0	0	0	15.8	5.2
67	4	2024-10-10	41	thursday	Landskronstrasse	2.61045e+06	1.26867e+06	functioning	psychodidae	0	0	0	0	15.8	5.2
67	4	2024-10-10	41	thursday	Landskronstrasse	2.61045e+06	1.26867e+06	functioning	undefined	0	0	0	0	15.8	5.2
164	8	2024-10-10	41	thursday	Gustav Wenk-Strasse	2.60969e+06	1.26866e+06	functioning	aedes	1	0	0	1	15.8	5.2
164	8	2024-10-10	41	thursday	Gustav Wenk-Strasse	2.60969e+06	1.26866e+06	functioning	chironomidae	1	0	0	1	15.8	5.2
164	8	2024-10-10	41	thursday	Gustav Wenk-Strasse	2.60969e+06	1.26866e+06	functioning	culex	0	0	0	0	15.8	5.2
164	8	2024-10-10	41	thursday	Gustav Wenk-Strasse	2.60969e+06	1.26866e+06	functioning	psychodidae	0	0	0	0	15.8	5.2
164	8	2024-10-10	41	thursday	Gustav Wenk-Strasse	2.60969e+06	1.26866e+06	functioning	undefined	0	0	0	0	15.8	5.2
58	2	2024-10-10	41	thursday	Ryffstrasse	2.61051e+06	1.26864e+06	functioning	aedes	0	0	0	0	15.8	5.2
58	2	2024-10-10	41	thursday	Ryffstrasse	2.61051e+06	1.26864e+06	functioning	chironomidae	0	0	0	0	15.8	5.2
58	2	2024-10-10	41	thursday	Ryffstrasse	2.61051e+06	1.26864e+06	functioning	culex	0	0	0	0	15.8	5.2
58	2	2024-10-10	41	thursday	Ryffstrasse	2.61051e+06	1.26864e+06	functioning	psychodidae	0	0	0	0	15.8	5.2
58	2	2024-10-10	41	thursday	Ryffstrasse	2.61051e+06	1.26864e+06	functioning	undefined	0	0	0	0	15.8	5.2
151	4	2024-10-10	41	thursday	Lachenstrasse	2.60981e+06	1.26864e+06	functioning	aedes	1	1	0	1	15.8	5.2
151	4	2024-10-10	41	thursday	Lachenstrasse	2.60981e+06	1.26864e+06	functioning	chironomidae	0	0	0	0	15.8	5.2
151	4	2024-10-10	41	thursday	Lachenstrasse	2.60981e+06	1.26864e+06	functioning	culex	0	0	0	0	15.8	5.2
151	4	2024-10-10	41	thursday	Lachenstrasse	2.60981e+06	1.26864e+06	functioning	psychodidae	0	0	0	0	15.8	5.2
151	4	2024-10-10	41	thursday	Lachenstrasse	2.60981e+06	1.26864e+06	functioning	undefined	0	0	0	0	15.8	5.2
28	4	2024-10-10	41	thursday	St. Johanns-Park	2.61071e+06	1.26863e+06	nonfunctioning						15.8	5.2	fell over
66	8	2024-10-10	41	wednesday	Ryffstrasse	2.61046e+06	1.2686e+06	nonfunctioning						15.8	5.2	fell over/ 10.10 instead of 09.10
160	2	2024-10-10	41	tuesday	Septerstrasse	2.60976e+06	1.26858e+06	functioning	aedes	0	0	0	0	15.8	5.2	10.10 instead 07.10
160	2	2024-10-10	41	tuesday	Septerstrasse	2.60976e+06	1.26858e+06	functioning	chironomidae	0	0	0	0	15.8	5.2	10.10 instead 07.10
160	2	2024-10-10	41	tuesday	Septerstrasse	2.60976e+06	1.26858e+06	functioning	culex	0	0	0	0	15.8	5.2	10.10 instead 07.10
160	2	2024-10-10	41	tuesday	Septerstrasse	2.60976e+06	1.26858e+06	functioning	psychodidae	0	0	0	0	15.8	5.2	10.10 instead 07.10
160	2	2024-10-10	41	tuesday	Septerstrasse	2.60976e+06	1.26858e+06	functioning	undefined	0	0	0	0	15.8	5.2	10.10 instead 07.10
161	10	2024-10-10	41	thursday	Dammerkirchstrasse	2.60975e+06	1.26858e+06	functioning	aedes	0	0	0	0	15.8	5.2
161	10	2024-10-10	41	thursday	Dammerkirchstrasse	2.60975e+06	1.26858e+06	functioning	chironomidae	0	0	0	0	15.8	5.2
161	10	2024-10-10	41	thursday	Dammerkirchstrasse	2.60975e+06	1.26858e+06	functioning	culex	0	0	0	0	15.8	5.2
161	10	2024-10-10	41	thursday	Dammerkirchstrasse	2.60975e+06	1.26858e+06	functioning	psychodidae	0	0	0	0	15.8	5.2
161	10	2024-10-10	41	thursday	Dammerkirchstrasse	2.60975e+06	1.26858e+06	functioning	undefined	0	0	0	0	15.8	5.2
88	0	2024-10-10	41	thursday	Vogesenstrasse	2.61037e+06	1.26858e+06	nonfunctioning						15.8	5.2	Parked on
61	0	2024-10-10	41	thursday	Mülhauserstrasse	2.61049e+06	1.26855e+06	functioning	aedes	0	0	0	0	15.8	5.2
61	0	2024-10-10	41	thursday	Mülhauserstrasse	2.61049e+06	1.26855e+06	functioning	chironomidae	0	0	0	0	15.8	5.2
61	0	2024-10-10	41	thursday	Mülhauserstrasse	2.61049e+06	1.26855e+06	functioning	culex	0	0	0	0	15.8	5.2
61	0	2024-10-10	41	thursday	Mülhauserstrasse	2.61049e+06	1.26855e+06	functioning	psychodidae	0	0	0	0	15.8	5.2
61	0	2024-10-10	41	thursday	Mülhauserstrasse	2.61049e+06	1.26855e+06	functioning	undefined	0	0	0	0	15.8	5.2
105	0	2024-10-10	41	thursday	Davidsbodenstrasse	2.61028e+06	1.2685e+06	functioning	chironomidae	6	5	0	6	15.8	5.2
105	0	2024-10-10	41	thursday	Davidsbodenstrasse	2.61028e+06	1.2685e+06	functioning	undefined	1	0	1	1	15.8	5.2
105	0	2024-10-10	41	thursday	Davidsbodenstrasse	2.61028e+06	1.2685e+06	functioning	aedes	0	0	0	0	15.8	5.2
105	0	2024-10-10	41	thursday	Davidsbodenstrasse	2.61028e+06	1.2685e+06	functioning	culex	0	0	0	0	15.8	5.2
105	0	2024-10-10	41	thursday	Davidsbodenstrasse	2.61028e+06	1.2685e+06	functioning	psychodidae	0	0	0	0	15.8	5.2
148	4	2024-10-10	41	thursday	Glaserbergstrasse	2.60982e+06	1.26846e+06	functioning	chironomidae	1	0	0	1	15.8	5.2
148	4	2024-10-10	41	thursday	Glaserbergstrasse	2.60982e+06	1.26846e+06	functioning	aedes	0	0	0	0	15.8	5.2
148	4	2024-10-10	41	thursday	Glaserbergstrasse	2.60982e+06	1.26846e+06	functioning	culex	0	0	0	0	15.8	5.2
148	4	2024-10-10	41	thursday	Glaserbergstrasse	2.60982e+06	1.26846e+06	functioning	psychodidae	0	0	0	0	15.8	5.2
148	4	2024-10-10	41	thursday	Glaserbergstrasse	2.60982e+06	1.26846e+06	functioning	undefined	0	0	0	0	15.8	5.2
31	6	2024-10-10	41	thursday	St. Johanns-Platz	2.6107e+06	1.26846e+06	functioning	aedes	0	0	0	0	15.8	5.2
31	6	2024-10-10	41	thursday	St. Johanns-Platz	2.6107e+06	1.26846e+06	functioning	chironomidae	0	0	0	0	15.8	5.2
31	6	2024-10-10	41	thursday	St. Johanns-Platz	2.6107e+06	1.26846e+06	functioning	culex	0	0	0	0	15.8	5.2
31	6	2024-10-10	41	thursday	St. Johanns-Platz	2.6107e+06	1.26846e+06	functioning	psychodidae	0	0	0	0	15.8	5.2
31	6	2024-10-10	41	thursday	St. Johanns-Platz	2.6107e+06	1.26846e+06	functioning	undefined	0	0	0	0	15.8	5.2
40	4	2024-10-10	41	thursday	Immengasse	2.61065e+06	1.26843e+06	nonfunctioning						15.8	5.2	fell over
62	4	2024-10-10	41	thursday	Vogesenstrasse	2.61048e+06	1.26842e+06	functioning	aedes	0	0	0	0	15.8	5.2
62	4	2024-10-10	41	thursday	Vogesenstrasse	2.61048e+06	1.26842e+06	functioning	chironomidae	0	0	0	0	15.8	5.2
62	4	2024-10-10	41	thursday	Vogesenstrasse	2.61048e+06	1.26842e+06	functioning	culex	0	0	0	0	15.8	5.2
62	4	2024-10-10	41	thursday	Vogesenstrasse	2.61048e+06	1.26842e+06	functioning	psychodidae	0	0	0	0	15.8	5.2
62	4	2024-10-10	41	thursday	Vogesenstrasse	2.61048e+06	1.26842e+06	functioning	undefined	0	0	0	0	15.8	5.2
44	0	2024-10-10	41	thursday	Lothringerstrasse	2.61062e+06	1.26838e+06	functioning	aedes	0	0	0	0	15.8	5.2
44	0	2024-10-10	41	thursday	Lothringerstrasse	2.61062e+06	1.26838e+06	functioning	chironomidae	0	0	0	0	15.8	5.2
44	0	2024-10-10	41	thursday	Lothringerstrasse	2.61062e+06	1.26838e+06	functioning	culex	0	0	0	0	15.8	5.2
44	0	2024-10-10	41	thursday	Lothringerstrasse	2.61062e+06	1.26838e+06	functioning	psychodidae	0	0	0	0	15.8	5.2
44	0	2024-10-10	41	thursday	Lothringerstrasse	2.61062e+06	1.26838e+06	functioning	undefined	0	0	0	0	15.8	5.2
11	8	2024-10-10	41	thursday	St. Johanns-Vorstadt	2.61087e+06	1.26833e+06	functioning	aedes	0	0	0	0	15.8	5.2
11	8	2024-10-10	41	thursday	St. Johanns-Vorstadt	2.61087e+06	1.26833e+06	functioning	chironomidae	0	0	0	0	15.8	5.2
11	8	2024-10-10	41	thursday	St. Johanns-Vorstadt	2.61087e+06	1.26833e+06	functioning	culex	0	0	0	0	15.8	5.2
11	8	2024-10-10	41	thursday	St. Johanns-Vorstadt	2.61087e+06	1.26833e+06	functioning	psychodidae	0	0	0	0	15.8	5.2
11	8	2024-10-10	41	thursday	St. Johanns-Vorstadt	2.61087e+06	1.26833e+06	functioning	undefined	0	0	0	0	15.8	5.2
8	4	2024-10-10	41	thursday	St. Johanns-Rheinweg	2.61091e+06	1.26832e+06	functioning	aedes	0	0	0	0	15.8	5.2
8	4	2024-10-10	41	thursday	St. Johanns-Rheinweg	2.61091e+06	1.26832e+06	functioning	chironomidae	0	0	0	0	15.8	5.2
8	4	2024-10-10	41	thursday	St. Johanns-Rheinweg	2.61091e+06	1.26832e+06	functioning	culex	0	0	0	0	15.8	5.2
8	4	2024-10-10	41	thursday	St. Johanns-Rheinweg	2.61091e+06	1.26832e+06	functioning	psychodidae	0	0	0	0	15.8	5.2
8	4	2024-10-10	41	thursday	St. Johanns-Rheinweg	2.61091e+06	1.26832e+06	functioning	undefined	0	0	0	0	15.8	5.2
93	0	2024-10-10	41	thursday	Hebelplatz	2.61035e+06	1.26824e+06	functioning	aedes	0	0	0	0	15.8	5.2
93	0	2024-10-10	41	thursday	Hebelplatz	2.61035e+06	1.26824e+06	functioning	chironomidae	0	0	0	0	15.8	5.2
93	0	2024-10-10	41	thursday	Hebelplatz	2.61035e+06	1.26824e+06	functioning	culex	0	0	0	0	15.8	5.2
93	0	2024-10-10	41	thursday	Hebelplatz	2.61035e+06	1.26824e+06	functioning	psychodidae	0	0	0	0	15.8	5.2
93	0	2024-10-10	41	thursday	Hebelplatz	2.61035e+06	1.26824e+06	functioning	undefined	0	0	0	0	15.8	5.2
63	6	2024-10-10	41	thursday	St. Johanns-Ring	2.61048e+06	1.26823e+06	functioning	aedes	0	0	0	0	15.8	5.2
63	6	2024-10-10	41	thursday	St. Johanns-Ring	2.61048e+06	1.26823e+06	functioning	chironomidae	0	0	0	0	15.8	5.2
63	6	2024-10-10	41	thursday	St. Johanns-Ring	2.61048e+06	1.26823e+06	functioning	culex	0	0	0	0	15.8	5.2
63	6	2024-10-10	41	thursday	St. Johanns-Ring	2.61048e+06	1.26823e+06	functioning	psychodidae	0	0	0	0	15.8	5.2
63	6	2024-10-10	41	thursday	St. Johanns-Ring	2.61048e+06	1.26823e+06	functioning	undefined	0	0	0	0	15.8	5.2
114	10	2024-10-10	41	thursday	Sommergasse	2.61018e+06	1.2682e+06	functioning	aedes	0	0	0	0	15.8	5.2
114	10	2024-10-10	41	thursday	Sommergasse	2.61018e+06	1.2682e+06	functioning	chironomidae	0	0	0	0	15.8	5.2
114	10	2024-10-10	41	thursday	Sommergasse	2.61018e+06	1.2682e+06	functioning	culex	0	0	0	0	15.8	5.2
114	10	2024-10-10	41	thursday	Sommergasse	2.61018e+06	1.2682e+06	functioning	psychodidae	0	0	0	0	15.8	5.2
114	10	2024-10-10	41	thursday	Sommergasse	2.61018e+06	1.2682e+06	functioning	undefined	0	0	0	0	15.8	5.2
65	0	2024-10-10	41	thursday	St. Johanns-Ring	2.61046e+06	1.26818e+06	functioning	chironomidae	1	1	0	1	15.8	5.2
65	0	2024-10-10	41	thursday	St. Johanns-Ring	2.61046e+06	1.26818e+06	functioning	aedes	0	0	0	0	15.8	5.2
65	0	2024-10-10	41	thursday	St. Johanns-Ring	2.61046e+06	1.26818e+06	functioning	culex	0	0	0	0	15.8	5.2
65	0	2024-10-10	41	thursday	St. Johanns-Ring	2.61046e+06	1.26818e+06	functioning	psychodidae	0	0	0	0	15.8	5.2
65	0	2024-10-10	41	thursday	St. Johanns-Ring	2.61046e+06	1.26818e+06	functioning	undefined	0	0	0	0	15.8	5.2
81	8	2024-10-10	41	thursday	St. Johanns-Ring	2.61039e+06	1.26812e+06	functioning	aedes	0	0	0	0	15.8	5.2
81	8	2024-10-10	41	thursday	St. Johanns-Ring	2.61039e+06	1.26812e+06	functioning	chironomidae	0	0	0	0	15.8	5.2
81	8	2024-10-10	41	thursday	St. Johanns-Ring	2.61039e+06	1.26812e+06	functioning	culex	0	0	0	0	15.8	5.2
81	8	2024-10-10	41	thursday	St. Johanns-Ring	2.61039e+06	1.26812e+06	functioning	psychodidae	0	0	0	0	15.8	5.2
81	8	2024-10-10	41	thursday	St. Johanns-Ring	2.61039e+06	1.26812e+06	functioning	undefined	0	0	0	0	15.8	5.2
117	10	2024-10-10	41	thursday	Kannenfeldstrasse	2.61016e+06	1.2681e+06	functioning	aedes	0	0	0	0	15.8	5.2
117	10	2024-10-10	41	thursday	Kannenfeldstrasse	2.61016e+06	1.2681e+06	functioning	chironomidae	0	0	0	0	15.8	5.2
117	10	2024-10-10	41	thursday	Kannenfeldstrasse	2.61016e+06	1.2681e+06	functioning	culex	0	0	0	0	15.8	5.2
117	10	2024-10-10	41	thursday	Kannenfeldstrasse	2.61016e+06	1.2681e+06	functioning	psychodidae	0	0	0	0	15.8	5.2
117	10	2024-10-10	41	thursday	Kannenfeldstrasse	2.61016e+06	1.2681e+06	functioning	undefined	0	0	0	0	15.8	5.2
90	8	2024-10-10	41	thursday	Mittlere Strasse	2.61037e+06	1.26807e+06	functioning	chironomidae	1	0	0	1	15.8	5.2
90	8	2024-10-10	41	thursday	Mittlere Strasse	2.61037e+06	1.26807e+06	functioning	aedes	0	0	0	0	15.8	5.2
90	8	2024-10-10	41	thursday	Mittlere Strasse	2.61037e+06	1.26807e+06	functioning	culex	0	0	0	0	15.8	5.2
90	8	2024-10-10	41	thursday	Mittlere Strasse	2.61037e+06	1.26807e+06	functioning	psychodidae	0	0	0	0	15.8	5.2
90	8	2024-10-10	41	thursday	Mittlere Strasse	2.61037e+06	1.26807e+06	functioning	undefined	0	0	0	0	15.8	5.2
53	8	2024-10-10	41	thursday	Mittlere Strasse	2.61053e+06	1.26783e+06	functioning	aedes	0	0	0	0	15.8	5.2
53	8	2024-10-10	41	thursday	Mittlere Strasse	2.61053e+06	1.26783e+06	functioning	chironomidae	0	0	0	0	15.8	5.2
53	8	2024-10-10	41	thursday	Mittlere Strasse	2.61053e+06	1.26783e+06	functioning	culex	0	0	0	0	15.8	5.2
53	8	2024-10-10	41	thursday	Mittlere Strasse	2.61053e+06	1.26783e+06	functioning	psychodidae	0	0	0	0	15.8	5.2
53	8	2024-10-10	41	thursday	Mittlere Strasse	2.61053e+06	1.26783e+06	functioning	undefined	0	0	0	0	15.8	5.2
45	6	2024-10-10	41	thursday	Mittlere Strasse	2.61062e+06	1.26774e+06	nonfunctioning						15.8	5.2	fell over
123	0	2024-10-15	42	tuesday	Elsässerstrasse	2.61007e+06	1.26953e+06	functioning	culex	1	0	0	1	14.7	4.7
123	0	2024-10-15	42	tuesday	Elsässerstrasse	2.61007e+06	1.26953e+06	functioning	aedes	0	0	0	0	14.7	4.7
123	0	2024-10-15	42	tuesday	Elsässerstrasse	2.61007e+06	1.26953e+06	functioning	chironomidae	0	0	0	0	14.7	4.7
123	0	2024-10-15	42	tuesday	Elsässerstrasse	2.61007e+06	1.26953e+06	functioning	psychodidae	0	0	0	0	14.7	4.7
123	0	2024-10-15	42	tuesday	Elsässerstrasse	2.61007e+06	1.26953e+06	functioning	undefined	0	0	0	0	14.7	4.7
120	8	2024-10-15	42	tuesday	Kohlenstrasse	2.61013e+06	1.26949e+06	functioning	aedes	0	0	0	0	14.7	4.7
120	8	2024-10-15	42	tuesday	Kohlenstrasse	2.61013e+06	1.26949e+06	functioning	chironomidae	0	0	0	0	14.7	4.7
120	8	2024-10-15	42	tuesday	Kohlenstrasse	2.61013e+06	1.26949e+06	functioning	culex	0	0	0	0	14.7	4.7
120	8	2024-10-15	42	tuesday	Kohlenstrasse	2.61013e+06	1.26949e+06	functioning	psychodidae	0	0	0	0	14.7	4.7
120	8	2024-10-15	42	tuesday	Kohlenstrasse	2.61013e+06	1.26949e+06	functioning	undefined	0	0	0	0	14.7	4.7
134	2	2024-10-15	42	tuesday	Lysbüchelstrasse	2.60999e+06	1.26944e+06	functioning	aedes	0	0	0	0	14.7	4.7
134	2	2024-10-15	42	tuesday	Lysbüchelstrasse	2.60999e+06	1.26944e+06	functioning	chironomidae	0	0	0	0	14.7	4.7
134	2	2024-10-15	42	tuesday	Lysbüchelstrasse	2.60999e+06	1.26944e+06	functioning	culex	0	0	0	0	14.7	4.7
134	2	2024-10-15	42	tuesday	Lysbüchelstrasse	2.60999e+06	1.26944e+06	functioning	psychodidae	0	0	0	0	14.7	4.7
134	2	2024-10-15	42	tuesday	Lysbüchelstrasse	2.60999e+06	1.26944e+06	functioning	undefined	0	0	0	0	14.7	4.7
129	8	2024-10-15	42	tuesday	Lysbüchelstrasse	2.61001e+06	1.26941e+06	functioning	aedes	0	0	0	0	14.7	4.7
129	8	2024-10-15	42	tuesday	Lysbüchelstrasse	2.61001e+06	1.26941e+06	functioning	chironomidae	0	0	0	0	14.7	4.7
129	8	2024-10-15	42	tuesday	Lysbüchelstrasse	2.61001e+06	1.26941e+06	functioning	culex	0	0	0	0	14.7	4.7
129	8	2024-10-15	42	tuesday	Lysbüchelstrasse	2.61001e+06	1.26941e+06	functioning	psychodidae	0	0	0	0	14.7	4.7
129	8	2024-10-15	42	tuesday	Lysbüchelstrasse	2.61001e+06	1.26941e+06	functioning	undefined	0	0	0	0	14.7	4.7
147	4	2024-10-15	42	tuesday	Hagenaustrasse	2.60982e+06	1.26927e+06	functioning	aedes	0	0	0	0	14.7	4.7
147	4	2024-10-15	42	tuesday	Hagenaustrasse	2.60982e+06	1.26927e+06	functioning	chironomidae	0	0	0	0	14.7	4.7
147	4	2024-10-15	42	tuesday	Hagenaustrasse	2.60982e+06	1.26927e+06	functioning	culex	0	0	0	0	14.7	4.7
147	4	2024-10-15	42	tuesday	Hagenaustrasse	2.60982e+06	1.26927e+06	functioning	psychodidae	0	0	0	0	14.7	4.7
147	4	2024-10-15	42	tuesday	Hagenaustrasse	2.60982e+06	1.26927e+06	functioning	undefined	0	0	0	0	14.7	4.7
121	8	2024-10-15	42	tuesday	Lysbüchelstrasse	2.6101e+06	1.26923e+06	nonfunctioning						14.7	4.7	fell over
156	8	2024-10-15	42	tuesday	Hagenaustrasse	2.60977e+06	1.26919e+06	functioning	aedes	0	0	0	0	14.7	4.7
156	8	2024-10-15	42	tuesday	Hagenaustrasse	2.60977e+06	1.26919e+06	functioning	chironomidae	0	0	0	0	14.7	4.7
156	8	2024-10-15	42	tuesday	Hagenaustrasse	2.60977e+06	1.26919e+06	functioning	culex	0	0	0	0	14.7	4.7
156	8	2024-10-15	42	tuesday	Hagenaustrasse	2.60977e+06	1.26919e+06	functioning	psychodidae	0	0	0	0	14.7	4.7
156	8	2024-10-15	42	tuesday	Hagenaustrasse	2.60977e+06	1.26919e+06	functioning	undefined	0	0	0	0	14.7	4.7
159	0	2024-10-15	42	tuesday	Hagenaustrasse	2.60976e+06	1.26918e+06	functioning	chironomidae	5	2	0	5	14.7	4.7
159	0	2024-10-15	42	tuesday	Hagenaustrasse	2.60976e+06	1.26918e+06	functioning	culex	4	0	0	4	14.7	4.7
159	0	2024-10-15	42	tuesday	Hagenaustrasse	2.60976e+06	1.26918e+06	functioning	aedes	0	0	0	0	14.7	4.7
159	0	2024-10-15	42	tuesday	Hagenaustrasse	2.60976e+06	1.26918e+06	functioning	psychodidae	0	0	0	0	14.7	4.7
159	0	2024-10-15	42	tuesday	Hagenaustrasse	2.60976e+06	1.26918e+06	functioning	undefined	0	0	0	0	14.7	4.7
157	4	2024-10-15	42	tuesday	Hagenaustrasse	2.60977e+06	1.26916e+06	functioning	aedes	0	0	0	0	14.7	4.7
157	4	2024-10-15	42	tuesday	Hagenaustrasse	2.60977e+06	1.26916e+06	functioning	chironomidae	0	0	0	0	14.7	4.7
157	4	2024-10-15	42	tuesday	Hagenaustrasse	2.60977e+06	1.26916e+06	functioning	culex	0	0	0	0	14.7	4.7
157	4	2024-10-15	42	tuesday	Hagenaustrasse	2.60977e+06	1.26916e+06	functioning	psychodidae	0	0	0	0	14.7	4.7
157	4	2024-10-15	42	tuesday	Hagenaustrasse	2.60977e+06	1.26916e+06	functioning	undefined	0	0	0	0	14.7	4.7
73	2	2024-10-15	42	tuesday	Kraftstrasse	2.61042e+06	1.26915e+06	functioning	aedes	0	0	0	0	14.7	4.7
73	2	2024-10-15	42	tuesday	Kraftstrasse	2.61042e+06	1.26915e+06	functioning	chironomidae	0	0	0	0	14.7	4.7
73	2	2024-10-15	42	tuesday	Kraftstrasse	2.61042e+06	1.26915e+06	functioning	culex	0	0	0	0	14.7	4.7
73	2	2024-10-15	42	tuesday	Kraftstrasse	2.61042e+06	1.26915e+06	functioning	psychodidae	0	0	0	0	14.7	4.7
73	2	2024-10-15	42	tuesday	Kraftstrasse	2.61042e+06	1.26915e+06	functioning	undefined	0	0	0	0	14.7	4.7
128	8	2024-10-15	42	tuesday	Lysbüchelstrasse	2.61002e+06	1.26915e+06	functioning	aedes	0	0	0	0	14.7	4.7
128	8	2024-10-15	42	tuesday	Lysbüchelstrasse	2.61002e+06	1.26915e+06	functioning	chironomidae	0	0	0	0	14.7	4.7
128	8	2024-10-15	42	tuesday	Lysbüchelstrasse	2.61002e+06	1.26915e+06	functioning	culex	0	0	0	0	14.7	4.7
128	8	2024-10-15	42	tuesday	Lysbüchelstrasse	2.61002e+06	1.26915e+06	functioning	psychodidae	0	0	0	0	14.7	4.7
128	8	2024-10-15	42	tuesday	Lysbüchelstrasse	2.61002e+06	1.26915e+06	functioning	undefined	0	0	0	0	14.7	4.7
178	8	2024-10-15	42	tuesday	Friedrich Miescher-Strasse	2.60934e+06	1.2691e+06	functioning	aedes	0	0	0	0	14.7	4.7
178	8	2024-10-15	42	tuesday	Friedrich Miescher-Strasse	2.60934e+06	1.2691e+06	functioning	chironomidae	0	0	0	0	14.7	4.7
178	8	2024-10-15	42	tuesday	Friedrich Miescher-Strasse	2.60934e+06	1.2691e+06	functioning	culex	0	0	0	0	14.7	4.7
178	8	2024-10-15	42	tuesday	Friedrich Miescher-Strasse	2.60934e+06	1.2691e+06	functioning	psychodidae	0	0	0	0	14.7	4.7
178	8	2024-10-15	42	tuesday	Friedrich Miescher-Strasse	2.60934e+06	1.2691e+06	functioning	undefined	0	0	0	0	14.7	4.7
180	4	2024-10-15	42	tuesday	Friedrich Miescher-Strasse	2.6093e+06	1.26907e+06	functioning	aedes	0	0	0	0	14.7	4.7
180	4	2024-10-15	42	tuesday	Friedrich Miescher-Strasse	2.6093e+06	1.26907e+06	functioning	chironomidae	0	0	0	0	14.7	4.7
180	4	2024-10-15	42	tuesday	Friedrich Miescher-Strasse	2.6093e+06	1.26907e+06	functioning	culex	0	0	0	0	14.7	4.7
180	4	2024-10-15	42	tuesday	Friedrich Miescher-Strasse	2.6093e+06	1.26907e+06	functioning	psychodidae	0	0	0	0	14.7	4.7
180	4	2024-10-15	42	tuesday	Friedrich Miescher-Strasse	2.6093e+06	1.26907e+06	functioning	undefined	0	0	0	0	14.7	4.7
155	4	2024-10-15	42	tuesday	Neudorfstrasse	2.60977e+06	1.26906e+06	functioning	aedes	0	0	0	0	14.7	4.7
155	4	2024-10-15	42	tuesday	Neudorfstrasse	2.60977e+06	1.26906e+06	functioning	chironomidae	0	0	0	0	14.7	4.7
155	4	2024-10-15	42	tuesday	Neudorfstrasse	2.60977e+06	1.26906e+06	functioning	culex	0	0	0	0	14.7	4.7
155	4	2024-10-15	42	tuesday	Neudorfstrasse	2.60977e+06	1.26906e+06	functioning	psychodidae	0	0	0	0	14.7	4.7
155	4	2024-10-15	42	tuesday	Neudorfstrasse	2.60977e+06	1.26906e+06	functioning	undefined	0	0	0	0	14.7	4.7
12	6	2024-10-15	42	tuesday	Mülhauserstrasse	2.61087e+06	1.26886e+06	functioning	aedes	0	0	0	0	14.7	4.7
12	6	2024-10-15	42	tuesday	Mülhauserstrasse	2.61087e+06	1.26886e+06	functioning	chironomidae	0	0	0	0	14.7	4.7
12	6	2024-10-15	42	tuesday	Mülhauserstrasse	2.61087e+06	1.26886e+06	functioning	culex	0	0	0	0	14.7	4.7
12	6	2024-10-15	42	tuesday	Mülhauserstrasse	2.61087e+06	1.26886e+06	functioning	psychodidae	0	0	0	0	14.7	4.7
12	6	2024-10-15	42	tuesday	Mülhauserstrasse	2.61087e+06	1.26886e+06	functioning	undefined	0	0	0	0	14.7	4.7
138	2	2024-10-15	42	tuesday	Wasensträsschen	2.60989e+06	1.26886e+06	functioning	aedes	0	0	0	0	14.7	4.7
138	2	2024-10-15	42	tuesday	Wasensträsschen	2.60989e+06	1.26886e+06	functioning	chironomidae	0	0	0	0	14.7	4.7
138	2	2024-10-15	42	tuesday	Wasensträsschen	2.60989e+06	1.26886e+06	functioning	culex	0	0	0	0	14.7	4.7
138	2	2024-10-15	42	tuesday	Wasensträsschen	2.60989e+06	1.26886e+06	functioning	psychodidae	0	0	0	0	14.7	4.7
138	2	2024-10-15	42	tuesday	Wasensträsschen	2.60989e+06	1.26886e+06	functioning	undefined	0	0	0	0	14.7	4.7
13	4	2024-10-15	42	tuesday	Mülhauserstrasse	2.61087e+06	1.26884e+06	functioning	aedes	0	0	0	0	14.7	4.7
13	4	2024-10-15	42	tuesday	Mülhauserstrasse	2.61087e+06	1.26884e+06	functioning	chironomidae	0	0	0	0	14.7	4.7
13	4	2024-10-15	42	tuesday	Mülhauserstrasse	2.61087e+06	1.26884e+06	functioning	culex	0	0	0	0	14.7	4.7
13	4	2024-10-15	42	tuesday	Mülhauserstrasse	2.61087e+06	1.26884e+06	functioning	psychodidae	0	0	0	0	14.7	4.7
13	4	2024-10-15	42	tuesday	Mülhauserstrasse	2.61087e+06	1.26884e+06	functioning	undefined	0	0	0	0	14.7	4.7
68	2	2024-10-15	42	tuesday	Wattstrasse	2.61045e+06	1.26883e+06	functioning	aedes	0	0	0	0	14.7	4.7
68	2	2024-10-15	42	tuesday	Wattstrasse	2.61045e+06	1.26883e+06	functioning	chironomidae	0	0	0	0	14.7	4.7
68	2	2024-10-15	42	tuesday	Wattstrasse	2.61045e+06	1.26883e+06	functioning	culex	0	0	0	0	14.7	4.7
68	2	2024-10-15	42	tuesday	Wattstrasse	2.61045e+06	1.26883e+06	functioning	psychodidae	0	0	0	0	14.7	4.7
68	2	2024-10-15	42	tuesday	Wattstrasse	2.61045e+06	1.26883e+06	functioning	undefined	0	0	0	0	14.7	4.7
55	6	2024-10-15	42	tuesday	Murbacherstrasse	2.61051e+06	1.26879e+06	functioning	aedes	0	0	0	0	14.7	4.7
55	6	2024-10-15	42	tuesday	Murbacherstrasse	2.61051e+06	1.26879e+06	functioning	chironomidae	0	0	0	0	14.7	4.7
55	6	2024-10-15	42	tuesday	Murbacherstrasse	2.61051e+06	1.26879e+06	functioning	culex	0	0	0	0	14.7	4.7
55	6	2024-10-15	42	tuesday	Murbacherstrasse	2.61051e+06	1.26879e+06	functioning	psychodidae	0	0	0	0	14.7	4.7
55	6	2024-10-15	42	tuesday	Murbacherstrasse	2.61051e+06	1.26879e+06	functioning	undefined	0	0	0	0	14.7	4.7
168	8	2024-10-15	42	tuesday	Gustav Wenk-Strasse	2.60964e+06	1.26871e+06	functioning	chironomidae	1	0	0	1	14.7	4.7
168	8	2024-10-15	42	tuesday	Gustav Wenk-Strasse	2.60964e+06	1.26871e+06	functioning	aedes	0	0	0	0	14.7	4.7
168	8	2024-10-15	42	tuesday	Gustav Wenk-Strasse	2.60964e+06	1.26871e+06	functioning	culex	0	0	0	0	14.7	4.7
168	8	2024-10-15	42	tuesday	Gustav Wenk-Strasse	2.60964e+06	1.26871e+06	functioning	psychodidae	0	0	0	0	14.7	4.7
168	8	2024-10-15	42	tuesday	Gustav Wenk-Strasse	2.60964e+06	1.26871e+06	functioning	undefined	0	0	0	0	14.7	4.7
76	4	2024-10-15	42	tuesday	Lothringerstrasse	2.61041e+06	1.26869e+06	functioning	aedes	0	0	0	0	14.7	4.7
76	4	2024-10-15	42	tuesday	Lothringerstrasse	2.61041e+06	1.26869e+06	functioning	chironomidae	0	0	0	0	14.7	4.7
76	4	2024-10-15	42	tuesday	Lothringerstrasse	2.61041e+06	1.26869e+06	functioning	culex	0	0	0	0	14.7	4.7
76	4	2024-10-15	42	tuesday	Lothringerstrasse	2.61041e+06	1.26869e+06	functioning	psychodidae	0	0	0	0	14.7	4.7
76	4	2024-10-15	42	tuesday	Lothringerstrasse	2.61041e+06	1.26869e+06	functioning	undefined	0	0	0	0	14.7	4.7
78	8	2024-10-15	42	tuesday	Lothringerstrasse	2.61041e+06	1.26869e+06	functioning	aedes	0	0	0	0	14.7	4.7
78	8	2024-10-15	42	tuesday	Lothringerstrasse	2.61041e+06	1.26869e+06	functioning	chironomidae	0	0	0	0	14.7	4.7
78	8	2024-10-15	42	tuesday	Lothringerstrasse	2.61041e+06	1.26869e+06	functioning	culex	0	0	0	0	14.7	4.7
78	8	2024-10-15	42	tuesday	Lothringerstrasse	2.61041e+06	1.26869e+06	functioning	psychodidae	0	0	0	0	14.7	4.7
78	8	2024-10-15	42	tuesday	Lothringerstrasse	2.61041e+06	1.26869e+06	functioning	undefined	0	0	0	0	14.7	4.7
34	10	2024-10-15	42	tuesday	Mülhauserstrasse	2.61067e+06	1.26867e+06	functioning	aedes	0	0	0	0	14.7	4.7
34	10	2024-10-15	42	tuesday	Mülhauserstrasse	2.61067e+06	1.26867e+06	functioning	chironomidae	0	0	0	0	14.7	4.7
34	10	2024-10-15	42	tuesday	Mülhauserstrasse	2.61067e+06	1.26867e+06	functioning	culex	0	0	0	0	14.7	4.7
34	10	2024-10-15	42	tuesday	Mülhauserstrasse	2.61067e+06	1.26867e+06	functioning	psychodidae	0	0	0	0	14.7	4.7
34	10	2024-10-15	42	tuesday	Mülhauserstrasse	2.61067e+06	1.26867e+06	functioning	undefined	0	0	0	0	14.7	4.7
18	6	2024-10-15	42	tuesday	Elsässerrheinweg	2.61083e+06	1.26866e+06	functioning	aedes	0	0	0	0	14.7	4.7
18	6	2024-10-15	42	tuesday	Elsässerrheinweg	2.61083e+06	1.26866e+06	functioning	chironomidae	0	0	0	0	14.7	4.7
18	6	2024-10-15	42	tuesday	Elsässerrheinweg	2.61083e+06	1.26866e+06	functioning	culex	0	0	0	0	14.7	4.7
18	6	2024-10-15	42	tuesday	Elsässerrheinweg	2.61083e+06	1.26866e+06	functioning	psychodidae	0	0	0	0	14.7	4.7
18	6	2024-10-15	42	tuesday	Elsässerrheinweg	2.61083e+06	1.26866e+06	functioning	undefined	0	0	0	0	14.7	4.7
69	8	2024-10-15	42	tuesday	Lothringerstrasse	2.61044e+06	1.26863e+06	functioning	psychodidae	12	0	12	12	14.7	4.7
69	8	2024-10-15	42	tuesday	Lothringerstrasse	2.61044e+06	1.26863e+06	functioning	undefined	1	0	1	1	14.7	4.7
69	8	2024-10-15	42	tuesday	Lothringerstrasse	2.61044e+06	1.26863e+06	functioning	chironomidae	1	0	0	1	14.7	4.7
69	8	2024-10-15	42	tuesday	Lothringerstrasse	2.61044e+06	1.26863e+06	functioning	aedes	0	0	0	0	14.7	4.7
69	8	2024-10-15	42	tuesday	Lothringerstrasse	2.61044e+06	1.26863e+06	functioning	culex	0	0	0	0	14.7	4.7
95	10	2024-10-15	42	tuesday	Vogesenstrasse	2.61033e+06	1.26862e+06	functioning	aedes	0	0	0	0	14.7	4.7
95	10	2024-10-15	42	tuesday	Vogesenstrasse	2.61033e+06	1.26862e+06	functioning	chironomidae	0	0	0	0	14.7	4.7
95	10	2024-10-15	42	tuesday	Vogesenstrasse	2.61033e+06	1.26862e+06	functioning	culex	0	0	0	0	14.7	4.7
95	10	2024-10-15	42	tuesday	Vogesenstrasse	2.61033e+06	1.26862e+06	functioning	psychodidae	0	0	0	0	14.7	4.7
95	10	2024-10-15	42	tuesday	Vogesenstrasse	2.61033e+06	1.26862e+06	functioning	undefined	0	0	0	0	14.7	4.7
132	6	2024-10-15	42	tuesday	Lenzgasse	2.61001e+06	1.26861e+06	functioning	aedes	0	0	0	0	14.7	4.7	3 Chironomidae in funnel
132	6	2024-10-15	42	tuesday	Lenzgasse	2.61001e+06	1.26861e+06	functioning	chironomidae	0	0	0	0	14.7	4.7	3 Chironomidae in funnel
132	6	2024-10-15	42	tuesday	Lenzgasse	2.61001e+06	1.26861e+06	functioning	culex	0	0	0	0	14.7	4.7	3 Chironomidae in funnel
132	6	2024-10-15	42	tuesday	Lenzgasse	2.61001e+06	1.26861e+06	functioning	psychodidae	0	0	0	0	14.7	4.7	3 Chironomidae in funnel
132	6	2024-10-15	42	tuesday	Lenzgasse	2.61001e+06	1.26861e+06	functioning	undefined	0	0	0	0	14.7	4.7	3 Chironomidae in funnel
165	0	2024-10-15	42	tuesday	Luzernerring	2.60967e+06	1.26861e+06	functioning	aedes	0	0	0	0	14.7	4.7
165	0	2024-10-15	42	tuesday	Luzernerring	2.60967e+06	1.26861e+06	functioning	chironomidae	0	0	0	0	14.7	4.7
165	0	2024-10-15	42	tuesday	Luzernerring	2.60967e+06	1.26861e+06	functioning	culex	0	0	0	0	14.7	4.7
165	0	2024-10-15	42	tuesday	Luzernerring	2.60967e+06	1.26861e+06	functioning	psychodidae	0	0	0	0	14.7	4.7
165	0	2024-10-15	42	tuesday	Luzernerring	2.60967e+06	1.26861e+06	functioning	undefined	0	0	0	0	14.7	4.7
160	2	2024-10-15	42	tuesday	Septerstrasse	2.60976e+06	1.26858e+06	nonfunctioning						14.7	4.7	parked over
43	10	2024-10-15	42	tuesday	Jungstrasse	2.61063e+06	1.26856e+06	functioning	aedes	0	0	0	0	14.7	4.7
43	10	2024-10-15	42	tuesday	Jungstrasse	2.61063e+06	1.26856e+06	functioning	chironomidae	0	0	0	0	14.7	4.7
43	10	2024-10-15	42	tuesday	Jungstrasse	2.61063e+06	1.26856e+06	functioning	culex	0	0	0	0	14.7	4.7
43	10	2024-10-15	42	tuesday	Jungstrasse	2.61063e+06	1.26856e+06	functioning	psychodidae	0	0	0	0	14.7	4.7
43	10	2024-10-15	42	tuesday	Jungstrasse	2.61063e+06	1.26856e+06	functioning	undefined	0	0	0	0	14.7	4.7
110	4	2024-10-15	42	tuesday	Im Davidsboden	2.61024e+06	1.26856e+06	functioning	aedes	0	0	0	0	14.7	4.7
110	4	2024-10-15	42	tuesday	Im Davidsboden	2.61024e+06	1.26856e+06	functioning	chironomidae	0	0	0	0	14.7	4.7
110	4	2024-10-15	42	tuesday	Im Davidsboden	2.61024e+06	1.26856e+06	functioning	culex	0	0	0	0	14.7	4.7
110	4	2024-10-15	42	tuesday	Im Davidsboden	2.61024e+06	1.26856e+06	functioning	psychodidae	0	0	0	0	14.7	4.7
110	4	2024-10-15	42	tuesday	Im Davidsboden	2.61024e+06	1.26856e+06	functioning	undefined	0	0	0	0	14.7	4.7
79	6	2024-10-15	42	tuesday	Vogesenstrasse	2.6104e+06	1.26854e+06	functioning	aedes	0	0	0	0	14.7	4.7
79	6	2024-10-15	42	tuesday	Vogesenstrasse	2.6104e+06	1.26854e+06	functioning	chironomidae	0	0	0	0	14.7	4.7
79	6	2024-10-15	42	tuesday	Vogesenstrasse	2.6104e+06	1.26854e+06	functioning	culex	0	0	0	0	14.7	4.7
79	6	2024-10-15	42	tuesday	Vogesenstrasse	2.6104e+06	1.26854e+06	functioning	psychodidae	0	0	0	0	14.7	4.7
79	6	2024-10-15	42	tuesday	Vogesenstrasse	2.6104e+06	1.26854e+06	functioning	undefined	0	0	0	0	14.7	4.7
158	10	2024-10-15	42	tuesday	Largitzenstrasse	2.60977e+06	1.26851e+06	functioning	aedes	0	0	0	0	14.7	4.7
158	10	2024-10-15	42	tuesday	Largitzenstrasse	2.60977e+06	1.26851e+06	functioning	chironomidae	0	0	0	0	14.7	4.7
158	10	2024-10-15	42	tuesday	Largitzenstrasse	2.60977e+06	1.26851e+06	functioning	culex	0	0	0	0	14.7	4.7
158	10	2024-10-15	42	tuesday	Largitzenstrasse	2.60977e+06	1.26851e+06	functioning	psychodidae	0	0	0	0	14.7	4.7
158	10	2024-10-15	42	tuesday	Largitzenstrasse	2.60977e+06	1.26851e+06	functioning	undefined	0	0	0	0	14.7	4.7
60	6	2024-10-15	42	tuesday	Jungstrasse	2.6105e+06	1.26848e+06	functioning	aedes	0	0	0	0	14.7	4.7
60	6	2024-10-15	42	tuesday	Jungstrasse	2.6105e+06	1.26848e+06	functioning	chironomidae	0	0	0	0	14.7	4.7
60	6	2024-10-15	42	tuesday	Jungstrasse	2.6105e+06	1.26848e+06	functioning	culex	0	0	0	0	14.7	4.7
60	6	2024-10-15	42	tuesday	Jungstrasse	2.6105e+06	1.26848e+06	functioning	psychodidae	0	0	0	0	14.7	4.7
60	6	2024-10-15	42	tuesday	Jungstrasse	2.6105e+06	1.26848e+06	functioning	undefined	0	0	0	0	14.7	4.7
49	2	2024-10-15	42	tuesday	Lothringerstrasse	2.61058e+06	1.26844e+06	functioning	aedes	0	0	0	0	14.7	4.7
49	2	2024-10-15	42	tuesday	Lothringerstrasse	2.61058e+06	1.26844e+06	functioning	chironomidae	0	0	0	0	14.7	4.7
49	2	2024-10-15	42	tuesday	Lothringerstrasse	2.61058e+06	1.26844e+06	functioning	culex	0	0	0	0	14.7	4.7
49	2	2024-10-15	42	tuesday	Lothringerstrasse	2.61058e+06	1.26844e+06	functioning	psychodidae	0	0	0	0	14.7	4.7
49	2	2024-10-15	42	tuesday	Lothringerstrasse	2.61058e+06	1.26844e+06	functioning	undefined	0	0	0	0	14.7	4.7
169	2	2024-10-15	42	tuesday	Luzernerring	2.60954e+06	1.26844e+06	functioning	aedes	0	0	0	0	14.7	4.7
169	2	2024-10-15	42	tuesday	Luzernerring	2.60954e+06	1.26844e+06	functioning	chironomidae	0	0	0	0	14.7	4.7
169	2	2024-10-15	42	tuesday	Luzernerring	2.60954e+06	1.26844e+06	functioning	culex	0	0	0	0	14.7	4.7
169	2	2024-10-15	42	tuesday	Luzernerring	2.60954e+06	1.26844e+06	functioning	psychodidae	0	0	0	0	14.7	4.7
169	2	2024-10-15	42	tuesday	Luzernerring	2.60954e+06	1.26844e+06	functioning	undefined	0	0	0	0	14.7	4.7
9	0	2024-10-15	42	tuesday	St. Johanns-Rheinweg	2.61088e+06	1.26843e+06	functioning	aedes	0	0	0	0	14.7	4.7
9	0	2024-10-15	42	tuesday	St. Johanns-Rheinweg	2.61088e+06	1.26843e+06	functioning	chironomidae	0	0	0	0	14.7	4.7
9	0	2024-10-15	42	tuesday	St. Johanns-Rheinweg	2.61088e+06	1.26843e+06	functioning	culex	0	0	0	0	14.7	4.7
9	0	2024-10-15	42	tuesday	St. Johanns-Rheinweg	2.61088e+06	1.26843e+06	functioning	psychodidae	0	0	0	0	14.7	4.7
9	0	2024-10-15	42	tuesday	St. Johanns-Rheinweg	2.61088e+06	1.26843e+06	functioning	undefined	0	0	0	0	14.7	4.7
87	8	2024-10-15	42	tuesday	Am Krayenrain	2.61037e+06	1.26837e+06	functioning	aedes	0	0	0	0	14.7	4.7
87	8	2024-10-15	42	tuesday	Am Krayenrain	2.61037e+06	1.26837e+06	functioning	chironomidae	0	0	0	0	14.7	4.7
87	8	2024-10-15	42	tuesday	Am Krayenrain	2.61037e+06	1.26837e+06	functioning	culex	0	0	0	0	14.7	4.7
87	8	2024-10-15	42	tuesday	Am Krayenrain	2.61037e+06	1.26837e+06	functioning	psychodidae	0	0	0	0	14.7	4.7
87	8	2024-10-15	42	tuesday	Am Krayenrain	2.61037e+06	1.26837e+06	functioning	undefined	0	0	0	0	14.7	4.7
15	0	2024-10-15	42	tuesday	St. Johanns-Vorstadt	2.61084e+06	1.26834e+06	functioning	aedes	0	0	0	0	14.7	4.7
15	0	2024-10-15	42	tuesday	St. Johanns-Vorstadt	2.61084e+06	1.26834e+06	functioning	chironomidae	0	0	0	0	14.7	4.7
15	0	2024-10-15	42	tuesday	St. Johanns-Vorstadt	2.61084e+06	1.26834e+06	functioning	culex	0	0	0	0	14.7	4.7
15	0	2024-10-15	42	tuesday	St. Johanns-Vorstadt	2.61084e+06	1.26834e+06	functioning	psychodidae	0	0	0	0	14.7	4.7
15	0	2024-10-15	42	tuesday	St. Johanns-Vorstadt	2.61084e+06	1.26834e+06	functioning	undefined	0	0	0	0	14.7	4.7
57	8	2024-10-15	42	tuesday	Klingelbergstrasse	2.61051e+06	1.26823e+06	functioning	aedes	0	0	0	0	14.7	4.7
57	8	2024-10-15	42	tuesday	Klingelbergstrasse	2.61051e+06	1.26823e+06	functioning	chironomidae	0	0	0	0	14.7	4.7
57	8	2024-10-15	42	tuesday	Klingelbergstrasse	2.61051e+06	1.26823e+06	functioning	culex	0	0	0	0	14.7	4.7
57	8	2024-10-15	42	tuesday	Klingelbergstrasse	2.61051e+06	1.26823e+06	functioning	psychodidae	0	0	0	0	14.7	4.7
57	8	2024-10-15	42	tuesday	Klingelbergstrasse	2.61051e+06	1.26823e+06	functioning	undefined	0	0	0	0	14.7	4.7
74	0	2024-10-15	42	tuesday	Hebelstrasse	2.61041e+06	1.26812e+06	functioning	aedes	0	0	0	0	14.7	4.7
74	0	2024-10-15	42	tuesday	Hebelstrasse	2.61041e+06	1.26812e+06	functioning	chironomidae	0	0	0	0	14.7	4.7
74	0	2024-10-15	42	tuesday	Hebelstrasse	2.61041e+06	1.26812e+06	functioning	culex	0	0	0	0	14.7	4.7
74	0	2024-10-15	42	tuesday	Hebelstrasse	2.61041e+06	1.26812e+06	functioning	psychodidae	0	0	0	0	14.7	4.7
74	0	2024-10-15	42	tuesday	Hebelstrasse	2.61041e+06	1.26812e+06	functioning	undefined	0	0	0	0	14.7	4.7
80	0	2024-10-15	42	tuesday	St. Johanns-Ring	2.6104e+06	1.26811e+06	functioning	chironomidae	1	1	0	1	14.7	4.7
80	0	2024-10-15	42	tuesday	St. Johanns-Ring	2.6104e+06	1.26811e+06	functioning	aedes	0	0	0	0	14.7	4.7
80	0	2024-10-15	42	tuesday	St. Johanns-Ring	2.6104e+06	1.26811e+06	functioning	culex	0	0	0	0	14.7	4.7
80	0	2024-10-15	42	tuesday	St. Johanns-Ring	2.6104e+06	1.26811e+06	functioning	psychodidae	0	0	0	0	14.7	4.7
80	0	2024-10-15	42	tuesday	St. Johanns-Ring	2.6104e+06	1.26811e+06	functioning	undefined	0	0	0	0	14.7	4.7
103	6	2024-10-15	42	monday	Sommergasse	2.61028e+06	1.26806e+06	functioning	aedes	0	0	0	0	14.7	4.7	15.10 instead 14.10
103	6	2024-10-15	42	monday	Sommergasse	2.61028e+06	1.26806e+06	functioning	chironomidae	0	0	0	0	14.7	4.7	15.10 instead 14.10
103	6	2024-10-15	42	monday	Sommergasse	2.61028e+06	1.26806e+06	functioning	culex	0	0	0	0	14.7	4.7	15.10 instead 14.10
103	6	2024-10-15	42	monday	Sommergasse	2.61028e+06	1.26806e+06	functioning	psychodidae	0	0	0	0	14.7	4.7	15.10 instead 14.10
103	6	2024-10-15	42	monday	Sommergasse	2.61028e+06	1.26806e+06	functioning	undefined	0	0	0	0	14.7	4.7	15.10 instead 14.10
37	8	2024-10-15	42	tuesday	Klingelbergstrasse	2.61066e+06	1.26804e+06	functioning	aedes	0	0	0	0	14.7	4.7
37	8	2024-10-15	42	tuesday	Klingelbergstrasse	2.61066e+06	1.26804e+06	functioning	chironomidae	0	0	0	0	14.7	4.7
37	8	2024-10-15	42	tuesday	Klingelbergstrasse	2.61066e+06	1.26804e+06	functioning	culex	0	0	0	0	14.7	4.7
37	8	2024-10-15	42	tuesday	Klingelbergstrasse	2.61066e+06	1.26804e+06	functioning	psychodidae	0	0	0	0	14.7	4.7
37	8	2024-10-15	42	tuesday	Klingelbergstrasse	2.61066e+06	1.26804e+06	functioning	undefined	0	0	0	0	14.7	4.7
3	2	2024-10-15	42	monday	St. Johanns-Vorstadt	2.61102e+06	1.268e+06	nonfunctioning						14.7	4.7	fell over 15.10 instead 14.10
111	10	2024-10-07	41	monday	Kohlenstrasse	2.61023e+06	1.26947e+06	functioning	psychodidae	1	0	1	1	16.7	3.1
111	10	2024-10-07	41	monday	Kohlenstrasse	2.61023e+06	1.26947e+06	functioning	aedes	0	0	0	0	16.7	3.1
111	10	2024-10-07	41	monday	Kohlenstrasse	2.61023e+06	1.26947e+06	functioning	chironomidae	0	0	0	0	16.7	3.1
111	10	2024-10-07	41	monday	Kohlenstrasse	2.61023e+06	1.26947e+06	functioning	culex	0	0	0	0	16.7	3.1
111	10	2024-10-07	41	monday	Kohlenstrasse	2.61023e+06	1.26947e+06	functioning	undefined	0	0	0	0	16.7	3.1
176	10	2024-10-07	41	monday	Schlachthofstrasse	2.60945e+06	1.26943e+06	functioning	chironomidae	1	0	0	1	16.7	3.1
176	10	2024-10-07	41	monday	Schlachthofstrasse	2.60945e+06	1.26943e+06	functioning	aedes	0	0	0	0	16.7	3.1
176	10	2024-10-07	41	monday	Schlachthofstrasse	2.60945e+06	1.26943e+06	functioning	culex	0	0	0	0	16.7	3.1
176	10	2024-10-07	41	monday	Schlachthofstrasse	2.60945e+06	1.26943e+06	functioning	psychodidae	0	0	0	0	16.7	3.1
176	10	2024-10-07	41	monday	Schlachthofstrasse	2.60945e+06	1.26943e+06	functioning	undefined	0	0	0	0	16.7	3.1
126	4	2024-10-07	41	monday	Lysbüchelstrasse	2.61006e+06	1.26932e+06	functioning	aedes	0	0	0	0	16.7	3.1
126	4	2024-10-07	41	monday	Lysbüchelstrasse	2.61006e+06	1.26932e+06	functioning	chironomidae	0	0	0	0	16.7	3.1
126	4	2024-10-07	41	monday	Lysbüchelstrasse	2.61006e+06	1.26932e+06	functioning	culex	0	0	0	0	16.7	3.1
126	4	2024-10-07	41	monday	Lysbüchelstrasse	2.61006e+06	1.26932e+06	functioning	psychodidae	0	0	0	0	16.7	3.1
126	4	2024-10-07	41	monday	Lysbüchelstrasse	2.61006e+06	1.26932e+06	functioning	undefined	0	0	0	0	16.7	3.1
163	0	2024-10-07	41	monday	Hagenaustrasse	2.60972e+06	1.26916e+06	functioning	chironomidae	5	5	0	5	16.7	3.1
163	0	2024-10-07	41	monday	Hagenaustrasse	2.60972e+06	1.26916e+06	functioning	aedes	0	0	0	0	16.7	3.1
163	0	2024-10-07	41	monday	Hagenaustrasse	2.60972e+06	1.26916e+06	functioning	culex	0	0	0	0	16.7	3.1
163	0	2024-10-07	41	monday	Hagenaustrasse	2.60972e+06	1.26916e+06	functioning	psychodidae	0	0	0	0	16.7	3.1
163	0	2024-10-07	41	monday	Hagenaustrasse	2.60972e+06	1.26916e+06	functioning	undefined	0	0	0	0	16.7	3.1
84	2	2024-10-07	41	monday	Hüningerstrasse	2.61038e+06	1.26912e+06	functioning	aedes	0	0	0	0	16.7	3.1
84	2	2024-10-07	41	monday	Hüningerstrasse	2.61038e+06	1.26912e+06	functioning	chironomidae	0	0	0	0	16.7	3.1
84	2	2024-10-07	41	monday	Hüningerstrasse	2.61038e+06	1.26912e+06	functioning	culex	0	0	0	0	16.7	3.1
84	2	2024-10-07	41	monday	Hüningerstrasse	2.61038e+06	1.26912e+06	functioning	psychodidae	0	0	0	0	16.7	3.1
84	2	2024-10-07	41	monday	Hüningerstrasse	2.61038e+06	1.26912e+06	functioning	undefined	0	0	0	0	16.7	3.1
150	0	2024-10-07	41	monday	Hagenaustrasse	2.60981e+06	1.26908e+06	functioning	chironomidae	3	1	0	3	16.7	3.1
150	0	2024-10-07	41	monday	Hagenaustrasse	2.60981e+06	1.26908e+06	functioning	aedes	0	0	0	0	16.7	3.1
150	0	2024-10-07	41	monday	Hagenaustrasse	2.60981e+06	1.26908e+06	functioning	culex	0	0	0	0	16.7	3.1
150	0	2024-10-07	41	monday	Hagenaustrasse	2.60981e+06	1.26908e+06	functioning	psychodidae	0	0	0	0	16.7	3.1
150	0	2024-10-07	41	monday	Hagenaustrasse	2.60981e+06	1.26908e+06	functioning	undefined	0	0	0	0	16.7	3.1
108	6	2024-10-07	41	monday	Beckenweg	2.61026e+06	1.26907e+06	functioning	aedes	0	0	0	0	16.7	3.1
108	6	2024-10-07	41	monday	Beckenweg	2.61026e+06	1.26907e+06	functioning	chironomidae	0	0	0	0	16.7	3.1
108	6	2024-10-07	41	monday	Beckenweg	2.61026e+06	1.26907e+06	functioning	culex	0	0	0	0	16.7	3.1
108	6	2024-10-07	41	monday	Beckenweg	2.61026e+06	1.26907e+06	functioning	psychodidae	0	0	0	0	16.7	3.1
108	6	2024-10-07	41	monday	Beckenweg	2.61026e+06	1.26907e+06	functioning	undefined	0	0	0	0	16.7	3.1
112	6	2024-10-07	41	monday	Lothringerstrasse	2.6102e+06	1.26903e+06	nonfunctioning						16.7	3.1	fell over
101	8	2024-10-07	41	monday	Hüningerstrasse	2.6103e+06	1.26903e+06	nonfunctioning						16.7	3.1	fell over
104	4	2024-10-07	41	monday	Lothringerstrasse	2.61028e+06	1.26891e+06	functioning	aedes	0	0	0	0	16.7	3.1
104	4	2024-10-07	41	monday	Lothringerstrasse	2.61028e+06	1.26891e+06	functioning	chironomidae	0	0	0	0	16.7	3.1
104	4	2024-10-07	41	monday	Lothringerstrasse	2.61028e+06	1.26891e+06	functioning	culex	0	0	0	0	16.7	3.1
104	4	2024-10-07	41	monday	Lothringerstrasse	2.61028e+06	1.26891e+06	functioning	psychodidae	0	0	0	0	16.7	3.1
104	4	2024-10-07	41	monday	Lothringerstrasse	2.61028e+06	1.26891e+06	functioning	undefined	0	0	0	0	16.7	3.1
133	4	2024-10-07	41	monday	Im Wasenboden	2.61e+06	1.26881e+06	functioning	aedes	0	0	0	0	16.7	3.1
133	4	2024-10-07	41	monday	Im Wasenboden	2.61e+06	1.26881e+06	functioning	chironomidae	0	0	0	0	16.7	3.1
133	4	2024-10-07	41	monday	Im Wasenboden	2.61e+06	1.26881e+06	functioning	culex	0	0	0	0	16.7	3.1
133	4	2024-10-07	41	monday	Im Wasenboden	2.61e+06	1.26881e+06	functioning	psychodidae	0	0	0	0	16.7	3.1
133	4	2024-10-07	41	monday	Im Wasenboden	2.61e+06	1.26881e+06	functioning	undefined	0	0	0	0	16.7	3.1
50	10	2024-10-07	41	monday	Landskronstrasse	2.61056e+06	1.26875e+06	functioning	aedes	0	0	0	0	16.7	3.1	detergent in catch basin
50	10	2024-10-07	41	monday	Landskronstrasse	2.61056e+06	1.26875e+06	functioning	chironomidae	0	0	0	0	16.7	3.1	detergent in catch basin
50	10	2024-10-07	41	monday	Landskronstrasse	2.61056e+06	1.26875e+06	functioning	culex	0	0	0	0	16.7	3.1	detergent in catch basin
50	10	2024-10-07	41	monday	Landskronstrasse	2.61056e+06	1.26875e+06	functioning	psychodidae	0	0	0	0	16.7	3.1	detergent in catch basin
50	10	2024-10-07	41	monday	Landskronstrasse	2.61056e+06	1.26875e+06	functioning	undefined	0	0	0	0	16.7	3.1	detergent in catch basin
54	10	2024-10-07	41	monday	Wattstrasse	2.61052e+06	1.26874e+06	functioning	aedes	0	0	0	0	16.7	3.1
54	10	2024-10-07	41	monday	Wattstrasse	2.61052e+06	1.26874e+06	functioning	chironomidae	0	0	0	0	16.7	3.1
54	10	2024-10-07	41	monday	Wattstrasse	2.61052e+06	1.26874e+06	functioning	culex	0	0	0	0	16.7	3.1
54	10	2024-10-07	41	monday	Wattstrasse	2.61052e+06	1.26874e+06	functioning	psychodidae	0	0	0	0	16.7	3.1
54	10	2024-10-07	41	monday	Wattstrasse	2.61052e+06	1.26874e+06	functioning	undefined	0	0	0	0	16.7	3.1
136	10	2024-10-07	41	monday	Lenzgasse	2.60995e+06	1.26867e+06	functioning	aedes	0	0	0	0	16.7	3.1
136	10	2024-10-07	41	monday	Lenzgasse	2.60995e+06	1.26867e+06	functioning	chironomidae	0	0	0	0	16.7	3.1
136	10	2024-10-07	41	monday	Lenzgasse	2.60995e+06	1.26867e+06	functioning	culex	0	0	0	0	16.7	3.1
136	10	2024-10-07	41	monday	Lenzgasse	2.60995e+06	1.26867e+06	functioning	psychodidae	0	0	0	0	16.7	3.1
136	10	2024-10-07	41	monday	Lenzgasse	2.60995e+06	1.26867e+06	functioning	undefined	0	0	0	0	16.7	3.1
139	6	2024-10-07	41	monday	Flughafenstrasse	2.60988e+06	1.26864e+06	functioning	culex	17	7	0	17	16.7	3.1
139	6	2024-10-07	41	monday	Flughafenstrasse	2.60988e+06	1.26864e+06	functioning	undefined	8	0	8	8	16.7	3.1
139	6	2024-10-07	41	monday	Flughafenstrasse	2.60988e+06	1.26864e+06	functioning	aedes	0	0	0	0	16.7	3.1
139	6	2024-10-07	41	monday	Flughafenstrasse	2.60988e+06	1.26864e+06	functioning	chironomidae	0	0	0	0	16.7	3.1
139	6	2024-10-07	41	monday	Flughafenstrasse	2.60988e+06	1.26864e+06	functioning	psychodidae	0	0	0	0	16.7	3.1
47	2	2024-10-07	41	monday	Mülhauserstrasse	2.61059e+06	1.26862e+06	functioning	aedes	0	0	0	0	16.7	3.1
47	2	2024-10-07	41	monday	Mülhauserstrasse	2.61059e+06	1.26862e+06	functioning	chironomidae	0	0	0	0	16.7	3.1
47	2	2024-10-07	41	monday	Mülhauserstrasse	2.61059e+06	1.26862e+06	functioning	culex	0	0	0	0	16.7	3.1
47	2	2024-10-07	41	monday	Mülhauserstrasse	2.61059e+06	1.26862e+06	functioning	psychodidae	0	0	0	0	16.7	3.1
47	2	2024-10-07	41	monday	Mülhauserstrasse	2.61059e+06	1.26862e+06	functioning	undefined	0	0	0	0	16.7	3.1
82	0	2024-10-07	41	monday	Vogesenstrasse	2.61039e+06	1.26856e+06	nonfunctioning						16.7	3.1	fell over
170	10	2024-10-07	41	monday	Julia Gauss-Strasse	2.60953e+06	1.26855e+06	functioning	chironomidae	2	1	0	2	16.7	3.1
170	10	2024-10-07	41	monday	Julia Gauss-Strasse	2.60953e+06	1.26855e+06	functioning	aedes	0	0	0	0	16.7	3.1
170	10	2024-10-07	41	monday	Julia Gauss-Strasse	2.60953e+06	1.26855e+06	functioning	culex	0	0	0	0	16.7	3.1
170	10	2024-10-07	41	monday	Julia Gauss-Strasse	2.60953e+06	1.26855e+06	functioning	psychodidae	0	0	0	0	16.7	3.1
170	10	2024-10-07	41	monday	Julia Gauss-Strasse	2.60953e+06	1.26855e+06	functioning	undefined	0	0	0	0	16.7	3.1
173	10	2024-10-07	41	monday	Julia Gauss-Strasse	2.60949e+06	1.26849e+06	functioning	aedes	0	0	0	0	16.7	3.1
173	10	2024-10-07	41	monday	Julia Gauss-Strasse	2.60949e+06	1.26849e+06	functioning	chironomidae	0	0	0	0	16.7	3.1
173	10	2024-10-07	41	monday	Julia Gauss-Strasse	2.60949e+06	1.26849e+06	functioning	culex	0	0	0	0	16.7	3.1
173	10	2024-10-07	41	monday	Julia Gauss-Strasse	2.60949e+06	1.26849e+06	functioning	psychodidae	0	0	0	0	16.7	3.1
173	10	2024-10-07	41	monday	Julia Gauss-Strasse	2.60949e+06	1.26849e+06	functioning	undefined	0	0	0	0	16.7	3.1
71	2	2024-10-07	41	monday	Mülhauserstrasse	2.61043e+06	1.26849e+06	functioning	aedes	0	0	0	0	16.7	3.1
71	2	2024-10-07	41	monday	Mülhauserstrasse	2.61043e+06	1.26849e+06	functioning	chironomidae	0	0	0	0	16.7	3.1
71	2	2024-10-07	41	monday	Mülhauserstrasse	2.61043e+06	1.26849e+06	functioning	culex	0	0	0	0	16.7	3.1
71	2	2024-10-07	41	monday	Mülhauserstrasse	2.61043e+06	1.26849e+06	functioning	psychodidae	0	0	0	0	16.7	3.1
71	2	2024-10-07	41	monday	Mülhauserstrasse	2.61043e+06	1.26849e+06	functioning	undefined	0	0	0	0	16.7	3.1
166	2	2024-10-07	41	monday	Dammerkirchstrasse	2.60965e+06	1.26847e+06	functioning	aedes	0	0	0	0	16.7	3.1
166	2	2024-10-07	41	monday	Dammerkirchstrasse	2.60965e+06	1.26847e+06	functioning	chironomidae	0	0	0	0	16.7	3.1
166	2	2024-10-07	41	monday	Dammerkirchstrasse	2.60965e+06	1.26847e+06	functioning	culex	0	0	0	0	16.7	3.1
166	2	2024-10-07	41	monday	Dammerkirchstrasse	2.60965e+06	1.26847e+06	functioning	psychodidae	0	0	0	0	16.7	3.1
166	2	2024-10-07	41	monday	Dammerkirchstrasse	2.60965e+06	1.26847e+06	functioning	undefined	0	0	0	0	16.7	3.1
19	10	2024-10-07	41	monday	St. Johanns-Vorstadt	2.6108e+06	1.26837e+06	nonfunctioning						16.7	3.1	fell over
22	10	2024-10-07	41	monday	St. Johanns-Platz	2.61077e+06	1.26834e+06	functioning	aedes	0	0	0	0	16.7	3.1
22	10	2024-10-07	41	monday	St. Johanns-Platz	2.61077e+06	1.26834e+06	functioning	chironomidae	0	0	0	0	16.7	3.1
22	10	2024-10-07	41	monday	St. Johanns-Platz	2.61077e+06	1.26834e+06	functioning	culex	0	0	0	0	16.7	3.1
22	10	2024-10-07	41	monday	St. Johanns-Platz	2.61077e+06	1.26834e+06	functioning	psychodidae	0	0	0	0	16.7	3.1
22	10	2024-10-07	41	monday	St. Johanns-Platz	2.61077e+06	1.26834e+06	functioning	undefined	0	0	0	0	16.7	3.1
97	2	2024-10-07	41	monday	Am Krayenrain	2.61032e+06	1.26833e+06	functioning	aedes	0	0	0	0	16.7	3.1
97	2	2024-10-07	41	monday	Am Krayenrain	2.61032e+06	1.26833e+06	functioning	chironomidae	0	0	0	0	16.7	3.1
97	2	2024-10-07	41	monday	Am Krayenrain	2.61032e+06	1.26833e+06	functioning	culex	0	0	0	0	16.7	3.1
97	2	2024-10-07	41	monday	Am Krayenrain	2.61032e+06	1.26833e+06	functioning	psychodidae	0	0	0	0	16.7	3.1
97	2	2024-10-07	41	monday	Am Krayenrain	2.61032e+06	1.26833e+06	functioning	undefined	0	0	0	0	16.7	3.1
23	6	2024-10-07	41	monday	Pestalozzistrasse	2.61076e+06	1.26832e+06	functioning	aedes	0	0	0	0	16.7	3.1
23	6	2024-10-07	41	monday	Pestalozzistrasse	2.61076e+06	1.26832e+06	functioning	chironomidae	0	0	0	0	16.7	3.1
23	6	2024-10-07	41	monday	Pestalozzistrasse	2.61076e+06	1.26832e+06	functioning	culex	0	0	0	0	16.7	3.1
23	6	2024-10-07	41	monday	Pestalozzistrasse	2.61076e+06	1.26832e+06	functioning	psychodidae	0	0	0	0	16.7	3.1
23	6	2024-10-07	41	monday	Pestalozzistrasse	2.61076e+06	1.26832e+06	functioning	undefined	0	0	0	0	16.7	3.1
24	6	2024-10-07	41	monday	Pestalozzistrasse	2.61075e+06	1.2683e+06	functioning	chironomidae	1	1	0	1	16.7	3.1
24	6	2024-10-07	41	monday	Pestalozzistrasse	2.61075e+06	1.2683e+06	functioning	aedes	0	0	0	0	16.7	3.1
24	6	2024-10-07	41	monday	Pestalozzistrasse	2.61075e+06	1.2683e+06	functioning	culex	0	0	0	0	16.7	3.1
24	6	2024-10-07	41	monday	Pestalozzistrasse	2.61075e+06	1.2683e+06	functioning	psychodidae	0	0	0	0	16.7	3.1
24	6	2024-10-07	41	monday	Pestalozzistrasse	2.61075e+06	1.2683e+06	functioning	undefined	0	0	0	0	16.7	3.1
27	4	2024-10-07	41	monday	Pestalozzistrasse	2.61071e+06	1.26828e+06	nonfunctioning						16.7	3.1	fell over
99	6	2024-10-07	41	monday	Metzerstrasse	2.61031e+06	1.26825e+06	functioning	aedes	0	0	0	0	16.7	3.1
99	6	2024-10-07	41	monday	Metzerstrasse	2.61031e+06	1.26825e+06	functioning	chironomidae	0	0	0	0	16.7	3.1
99	6	2024-10-07	41	monday	Metzerstrasse	2.61031e+06	1.26825e+06	functioning	culex	0	0	0	0	16.7	3.1
99	6	2024-10-07	41	monday	Metzerstrasse	2.61031e+06	1.26825e+06	functioning	psychodidae	0	0	0	0	16.7	3.1
99	6	2024-10-07	41	monday	Metzerstrasse	2.61031e+06	1.26825e+06	functioning	undefined	0	0	0	0	16.7	3.1
75	8	2024-10-07	41	monday	Metzerstrasse	2.61041e+06	1.26822e+06	functioning	aedes	0	0	0	0	16.7	3.1
75	8	2024-10-07	41	monday	Metzerstrasse	2.61041e+06	1.26822e+06	functioning	chironomidae	0	0	0	0	16.7	3.1
75	8	2024-10-07	41	monday	Metzerstrasse	2.61041e+06	1.26822e+06	functioning	culex	0	0	0	0	16.7	3.1
75	8	2024-10-07	41	monday	Metzerstrasse	2.61041e+06	1.26822e+06	functioning	psychodidae	0	0	0	0	16.7	3.1
75	8	2024-10-07	41	monday	Metzerstrasse	2.61041e+06	1.26822e+06	functioning	undefined	0	0	0	0	16.7	3.1
26	4	2024-10-07	41	monday	Spitalstrasse	2.61074e+06	1.26821e+06	functioning	aedes	0	0	0	0	16.7	3.1
26	4	2024-10-07	41	monday	Spitalstrasse	2.61074e+06	1.26821e+06	functioning	chironomidae	0	0	0	0	16.7	3.1
26	4	2024-10-07	41	monday	Spitalstrasse	2.61074e+06	1.26821e+06	functioning	culex	0	0	0	0	16.7	3.1
26	4	2024-10-07	41	monday	Spitalstrasse	2.61074e+06	1.26821e+06	functioning	psychodidae	0	0	0	0	16.7	3.1
26	4	2024-10-07	41	monday	Spitalstrasse	2.61074e+06	1.26821e+06	functioning	undefined	0	0	0	0	16.7	3.1
77	4	2024-10-07	41	monday	Metzerstrasse	2.61041e+06	1.26821e+06	functioning	aedes	0	0	0	0	16.7	3.1
77	4	2024-10-07	41	monday	Metzerstrasse	2.61041e+06	1.26821e+06	functioning	chironomidae	0	0	0	0	16.7	3.1
77	4	2024-10-07	41	monday	Metzerstrasse	2.61041e+06	1.26821e+06	functioning	culex	0	0	0	0	16.7	3.1
77	4	2024-10-07	41	monday	Metzerstrasse	2.61041e+06	1.26821e+06	functioning	psychodidae	0	0	0	0	16.7	3.1
77	4	2024-10-07	41	monday	Metzerstrasse	2.61041e+06	1.26821e+06	functioning	undefined	0	0	0	0	16.7	3.1
5	0	2024-10-07	41	monday	St. Johanns-Rheinweg	2.61095e+06	1.26821e+06	functioning	aedes	0	0	0	0	16.7	3.1
5	0	2024-10-07	41	monday	St. Johanns-Rheinweg	2.61095e+06	1.26821e+06	functioning	chironomidae	0	0	0	0	16.7	3.1
5	0	2024-10-07	41	monday	St. Johanns-Rheinweg	2.61095e+06	1.26821e+06	functioning	culex	0	0	0	0	16.7	3.1
5	0	2024-10-07	41	monday	St. Johanns-Rheinweg	2.61095e+06	1.26821e+06	functioning	psychodidae	0	0	0	0	16.7	3.1
5	0	2024-10-07	41	monday	St. Johanns-Rheinweg	2.61095e+06	1.26821e+06	functioning	undefined	0	0	0	0	16.7	3.1
7	10	2024-10-07	41	monday	St. Johanns-Vorstadt	2.61092e+06	1.2682e+06	functioning	aedes	0	0	0	0	16.7	3.1
7	10	2024-10-07	41	monday	St. Johanns-Vorstadt	2.61092e+06	1.2682e+06	functioning	chironomidae	0	0	0	0	16.7	3.1
7	10	2024-10-07	41	monday	St. Johanns-Vorstadt	2.61092e+06	1.2682e+06	functioning	culex	0	0	0	0	16.7	3.1
7	10	2024-10-07	41	monday	St. Johanns-Vorstadt	2.61092e+06	1.2682e+06	functioning	psychodidae	0	0	0	0	16.7	3.1
7	10	2024-10-07	41	monday	St. Johanns-Vorstadt	2.61092e+06	1.2682e+06	functioning	undefined	0	0	0	0	16.7	3.1
6	2	2024-10-07	41	monday	St. Johanns-Vorstadt	2.61094e+06	1.26816e+06	functioning	aedes	0	0	0	0	16.7	3.1
6	2	2024-10-07	41	monday	St. Johanns-Vorstadt	2.61094e+06	1.26816e+06	functioning	chironomidae	0	0	0	0	16.7	3.1
6	2	2024-10-07	41	monday	St. Johanns-Vorstadt	2.61094e+06	1.26816e+06	functioning	culex	0	0	0	0	16.7	3.1
6	2	2024-10-07	41	monday	St. Johanns-Vorstadt	2.61094e+06	1.26816e+06	functioning	psychodidae	0	0	0	0	16.7	3.1
6	2	2024-10-07	41	monday	St. Johanns-Vorstadt	2.61094e+06	1.26816e+06	functioning	undefined	0	0	0	0	16.7	3.1
70	6	2024-10-07	41	monday	St. Johanns-Ring	2.61044e+06	1.26816e+06	functioning	aedes	0	0	0	0	16.7	3.1
70	6	2024-10-07	41	monday	St. Johanns-Ring	2.61044e+06	1.26816e+06	functioning	chironomidae	0	0	0	0	16.7	3.1
70	6	2024-10-07	41	monday	St. Johanns-Ring	2.61044e+06	1.26816e+06	functioning	culex	0	0	0	0	16.7	3.1
70	6	2024-10-07	41	monday	St. Johanns-Ring	2.61044e+06	1.26816e+06	functioning	psychodidae	0	0	0	0	16.7	3.1
70	6	2024-10-07	41	monday	St. Johanns-Ring	2.61044e+06	1.26816e+06	functioning	undefined	0	0	0	0	16.7	3.1
103	6	2024-10-07	41	monday	Sommergasse	2.61028e+06	1.26806e+06	functioning	chironomidae	3	1	0	3	16.7	3.1
103	6	2024-10-07	41	monday	Sommergasse	2.61028e+06	1.26806e+06	functioning	aedes	0	0	0	0	16.7	3.1
103	6	2024-10-07	41	monday	Sommergasse	2.61028e+06	1.26806e+06	functioning	culex	0	0	0	0	16.7	3.1
103	6	2024-10-07	41	monday	Sommergasse	2.61028e+06	1.26806e+06	functioning	psychodidae	0	0	0	0	16.7	3.1
103	6	2024-10-07	41	monday	Sommergasse	2.61028e+06	1.26806e+06	functioning	undefined	0	0	0	0	16.7	3.1
39	6	2024-10-07	41	monday	Klingelbergstrasse	2.61066e+06	1.26805e+06	functioning	aedes	0	0	0	0	16.7	3.1
39	6	2024-10-07	41	monday	Klingelbergstrasse	2.61066e+06	1.26805e+06	functioning	chironomidae	0	0	0	0	16.7	3.1
39	6	2024-10-07	41	monday	Klingelbergstrasse	2.61066e+06	1.26805e+06	functioning	culex	0	0	0	0	16.7	3.1
39	6	2024-10-07	41	monday	Klingelbergstrasse	2.61066e+06	1.26805e+06	functioning	psychodidae	0	0	0	0	16.7	3.1
39	6	2024-10-07	41	monday	Klingelbergstrasse	2.61066e+06	1.26805e+06	functioning	undefined	0	0	0	0	16.7	3.1
64	0	2024-10-07	41	monday	Hebelstrasse	2.61048e+06	1.26805e+06	nonfunctioning						16.7	3.1	fell over
3	2	2024-10-07	41	monday	St. Johanns-Vorstadt	2.61102e+06	1.268e+06	nonfunctioning						16.7	3.1	fell over
38	10	2024-10-07	41	monday	Bernoullistrasse	2.61066e+06	1.26771e+06	functioning	chironomidae	2	1	0	2	16.7	3.1
38	10	2024-10-07	41	monday	Bernoullistrasse	2.61066e+06	1.26771e+06	functioning	aedes	0	0	0	0	16.7	3.1
38	10	2024-10-07	41	monday	Bernoullistrasse	2.61066e+06	1.26771e+06	functioning	culex	0	0	0	0	16.7	3.1
38	10	2024-10-07	41	monday	Bernoullistrasse	2.61066e+06	1.26771e+06	functioning	psychodidae	0	0	0	0	16.7	3.1
38	10	2024-10-07	41	monday	Bernoullistrasse	2.61066e+06	1.26771e+06	functioning	undefined	0	0	0	0	16.7	3.1
42	8	2024-10-07	41	monday	Mittlere Strasse	2.61064e+06	1.26771e+06	functioning	aedes	0	0	0	0	16.7	3.1
42	8	2024-10-07	41	monday	Mittlere Strasse	2.61064e+06	1.26771e+06	functioning	chironomidae	0	0	0	0	16.7	3.1
42	8	2024-10-07	41	monday	Mittlere Strasse	2.61064e+06	1.26771e+06	functioning	culex	0	0	0	0	16.7	3.1
42	8	2024-10-07	41	monday	Mittlere Strasse	2.61064e+06	1.26771e+06	functioning	psychodidae	0	0	0	0	16.7	3.1
42	8	2024-10-07	41	monday	Mittlere Strasse	2.61064e+06	1.26771e+06	functioning	undefined	0	0	0	0	16.7	3.1
111	10	2024-08-19	34	monday	Kohlenstrasse	2.61023e+06	1.26947e+06	functioning	aedes	0	0	0	0	20.9	2.1
111	10	2024-08-19	34	monday	Kohlenstrasse	2.61023e+06	1.26947e+06	functioning	chironomidae	0	0	0	0	20.9	2.1
111	10	2024-08-19	34	monday	Kohlenstrasse	2.61023e+06	1.26947e+06	functioning	culex	0	0	0	0	20.9	2.1
111	10	2024-08-19	34	monday	Kohlenstrasse	2.61023e+06	1.26947e+06	functioning	psychodidae	0	0	0	0	20.9	2.1
111	10	2024-08-19	34	monday	Kohlenstrasse	2.61023e+06	1.26947e+06	functioning	undefined	0	0	0	0	20.9	2.1
176	10	2024-08-19	34	monday	Schlachthofstrasse	2.60945e+06	1.26943e+06	functioning	chironomidae	3	1	2	3	20.9	2.1
176	10	2024-08-19	34	monday	Schlachthofstrasse	2.60945e+06	1.26943e+06	functioning	aedes	0	0	0	0	20.9	2.1
176	10	2024-08-19	34	monday	Schlachthofstrasse	2.60945e+06	1.26943e+06	functioning	culex	0	0	0	0	20.9	2.1
176	10	2024-08-19	34	monday	Schlachthofstrasse	2.60945e+06	1.26943e+06	functioning	psychodidae	0	0	0	0	20.9	2.1
176	10	2024-08-19	34	monday	Schlachthofstrasse	2.60945e+06	1.26943e+06	functioning	undefined	0	0	0	0	20.9	2.1
126	4	2024-08-19	34	monday	Lysbüchelstrasse	2.61006e+06	1.26932e+06	functioning	aedes	0	0	0	0	20.9	2.1
126	4	2024-08-19	34	monday	Lysbüchelstrasse	2.61006e+06	1.26932e+06	functioning	chironomidae	0	0	0	0	20.9	2.1
126	4	2024-08-19	34	monday	Lysbüchelstrasse	2.61006e+06	1.26932e+06	functioning	culex	0	0	0	0	20.9	2.1
126	4	2024-08-19	34	monday	Lysbüchelstrasse	2.61006e+06	1.26932e+06	functioning	psychodidae	0	0	0	0	20.9	2.1
126	4	2024-08-19	34	monday	Lysbüchelstrasse	2.61006e+06	1.26932e+06	functioning	undefined	0	0	0	0	20.9	2.1
163	0	2024-08-19	34	monday	Hagenaustrasse	2.60972e+06	1.26916e+06	functioning	aedes	0	0	0	0	20.9	2.1
163	0	2024-08-19	34	monday	Hagenaustrasse	2.60972e+06	1.26916e+06	functioning	chironomidae	0	0	0	0	20.9	2.1
163	0	2024-08-19	34	monday	Hagenaustrasse	2.60972e+06	1.26916e+06	functioning	culex	0	0	0	0	20.9	2.1
163	0	2024-08-19	34	monday	Hagenaustrasse	2.60972e+06	1.26916e+06	functioning	psychodidae	0	0	0	0	20.9	2.1
163	0	2024-08-19	34	monday	Hagenaustrasse	2.60972e+06	1.26916e+06	functioning	undefined	0	0	0	0	20.9	2.1
84	2	2024-08-19	34	monday	Hüningerstrasse	2.61038e+06	1.26912e+06	functioning	aedes	0	0	0	0	20.9	2.1
84	2	2024-08-19	34	monday	Hüningerstrasse	2.61038e+06	1.26912e+06	functioning	chironomidae	0	0	0	0	20.9	2.1
84	2	2024-08-19	34	monday	Hüningerstrasse	2.61038e+06	1.26912e+06	functioning	culex	0	0	0	0	20.9	2.1
84	2	2024-08-19	34	monday	Hüningerstrasse	2.61038e+06	1.26912e+06	functioning	psychodidae	0	0	0	0	20.9	2.1
84	2	2024-08-19	34	monday	Hüningerstrasse	2.61038e+06	1.26912e+06	functioning	undefined	0	0	0	0	20.9	2.1
150	0	2024-08-19	34	monday	Hagenaustrasse	2.60981e+06	1.26908e+06	functioning	culex	2	1	0	2	20.9	2.1
150	0	2024-08-19	34	monday	Hagenaustrasse	2.60981e+06	1.26908e+06	functioning	aedes	0	0	0	0	20.9	2.1
150	0	2024-08-19	34	monday	Hagenaustrasse	2.60981e+06	1.26908e+06	functioning	chironomidae	0	0	0	0	20.9	2.1
150	0	2024-08-19	34	monday	Hagenaustrasse	2.60981e+06	1.26908e+06	functioning	psychodidae	0	0	0	0	20.9	2.1
150	0	2024-08-19	34	monday	Hagenaustrasse	2.60981e+06	1.26908e+06	functioning	undefined	0	0	0	0	20.9	2.1
108	6	2024-08-19	34	monday	Beckenweg	2.61026e+06	1.26907e+06	functioning	chironomidae	1	0	0	1	20.9	2.1
108	6	2024-08-19	34	monday	Beckenweg	2.61026e+06	1.26907e+06	functioning	aedes	0	0	0	0	20.9	2.1
108	6	2024-08-19	34	monday	Beckenweg	2.61026e+06	1.26907e+06	functioning	culex	0	0	0	0	20.9	2.1
108	6	2024-08-19	34	monday	Beckenweg	2.61026e+06	1.26907e+06	functioning	psychodidae	0	0	0	0	20.9	2.1
108	6	2024-08-19	34	monday	Beckenweg	2.61026e+06	1.26907e+06	functioning	undefined	0	0	0	0	20.9	2.1
112	6	2024-08-19	34	monday	Lothringerstrasse	2.6102e+06	1.26903e+06	functioning	aedes	0	0	0	0	20.9	2.1
112	6	2024-08-19	34	monday	Lothringerstrasse	2.6102e+06	1.26903e+06	functioning	chironomidae	0	0	0	0	20.9	2.1
112	6	2024-08-19	34	monday	Lothringerstrasse	2.6102e+06	1.26903e+06	functioning	culex	0	0	0	0	20.9	2.1
112	6	2024-08-19	34	monday	Lothringerstrasse	2.6102e+06	1.26903e+06	functioning	psychodidae	0	0	0	0	20.9	2.1
112	6	2024-08-19	34	monday	Lothringerstrasse	2.6102e+06	1.26903e+06	functioning	undefined	0	0	0	0	20.9	2.1
101	8	2024-08-19	34	monday	Hüningerstrasse	2.6103e+06	1.26903e+06	functioning	aedes	0	0	0	0	20.9	2.1
101	8	2024-08-19	34	monday	Hüningerstrasse	2.6103e+06	1.26903e+06	functioning	chironomidae	0	0	0	0	20.9	2.1
101	8	2024-08-19	34	monday	Hüningerstrasse	2.6103e+06	1.26903e+06	functioning	culex	0	0	0	0	20.9	2.1
101	8	2024-08-19	34	monday	Hüningerstrasse	2.6103e+06	1.26903e+06	functioning	psychodidae	0	0	0	0	20.9	2.1
101	8	2024-08-19	34	monday	Hüningerstrasse	2.6103e+06	1.26903e+06	functioning	undefined	0	0	0	0	20.9	2.1
104	4	2024-08-19	34	monday	Lothringerstrasse	2.61028e+06	1.26891e+06	functioning	chironomidae	1	0	0	1	20.9	2.1
104	4	2024-08-19	34	monday	Lothringerstrasse	2.61028e+06	1.26891e+06	functioning	aedes	0	0	0	0	20.9	2.1
104	4	2024-08-19	34	monday	Lothringerstrasse	2.61028e+06	1.26891e+06	functioning	culex	0	0	0	0	20.9	2.1
104	4	2024-08-19	34	monday	Lothringerstrasse	2.61028e+06	1.26891e+06	functioning	psychodidae	0	0	0	0	20.9	2.1
104	4	2024-08-19	34	monday	Lothringerstrasse	2.61028e+06	1.26891e+06	functioning	undefined	0	0	0	0	20.9	2.1
133	4	2024-08-19	34	monday	Im Wasenboden	2.61e+06	1.26881e+06	functioning	aedes	0	0	0	0	20.9	2.1
133	4	2024-08-19	34	monday	Im Wasenboden	2.61e+06	1.26881e+06	functioning	chironomidae	0	0	0	0	20.9	2.1
133	4	2024-08-19	34	monday	Im Wasenboden	2.61e+06	1.26881e+06	functioning	culex	0	0	0	0	20.9	2.1
133	4	2024-08-19	34	monday	Im Wasenboden	2.61e+06	1.26881e+06	functioning	psychodidae	0	0	0	0	20.9	2.1
133	4	2024-08-19	34	monday	Im Wasenboden	2.61e+06	1.26881e+06	functioning	undefined	0	0	0	0	20.9	2.1
50	10	2024-08-19	34	monday	Landskronstrasse	2.61056e+06	1.26875e+06	functioning	chironomidae	1	1	0	1	20.9	2.1
50	10	2024-08-19	34	monday	Landskronstrasse	2.61056e+06	1.26875e+06	functioning	aedes	0	0	0	0	20.9	2.1
50	10	2024-08-19	34	monday	Landskronstrasse	2.61056e+06	1.26875e+06	functioning	culex	0	0	0	0	20.9	2.1
50	10	2024-08-19	34	monday	Landskronstrasse	2.61056e+06	1.26875e+06	functioning	psychodidae	0	0	0	0	20.9	2.1
50	10	2024-08-19	34	monday	Landskronstrasse	2.61056e+06	1.26875e+06	functioning	undefined	0	0	0	0	20.9	2.1
54	10	2024-08-19	34	monday	Wattstrasse	2.61052e+06	1.26874e+06	functioning	aedes	0	0	0	0	20.9	2.1
54	10	2024-08-19	34	monday	Wattstrasse	2.61052e+06	1.26874e+06	functioning	chironomidae	0	0	0	0	20.9	2.1
54	10	2024-08-19	34	monday	Wattstrasse	2.61052e+06	1.26874e+06	functioning	culex	0	0	0	0	20.9	2.1
54	10	2024-08-19	34	monday	Wattstrasse	2.61052e+06	1.26874e+06	functioning	psychodidae	0	0	0	0	20.9	2.1
54	10	2024-08-19	34	monday	Wattstrasse	2.61052e+06	1.26874e+06	functioning	undefined	0	0	0	0	20.9	2.1
136	10	2024-08-19	34	monday	Lenzgasse	2.60995e+06	1.26867e+06	functioning	aedes	0	0	0	0	20.9	2.1
136	10	2024-08-19	34	monday	Lenzgasse	2.60995e+06	1.26867e+06	functioning	chironomidae	0	0	0	0	20.9	2.1
136	10	2024-08-19	34	monday	Lenzgasse	2.60995e+06	1.26867e+06	functioning	culex	0	0	0	0	20.9	2.1
136	10	2024-08-19	34	monday	Lenzgasse	2.60995e+06	1.26867e+06	functioning	psychodidae	0	0	0	0	20.9	2.1
136	10	2024-08-19	34	monday	Lenzgasse	2.60995e+06	1.26867e+06	functioning	undefined	0	0	0	0	20.9	2.1
139	6	2024-08-19	34	monday	Flughafenstrasse	2.60988e+06	1.26864e+06	functioning	culex	3	2	1	3	20.9	2.1
139	6	2024-08-19	34	monday	Flughafenstrasse	2.60988e+06	1.26864e+06	functioning	aedes	1	0	0	1	20.9	2.1
139	6	2024-08-19	34	monday	Flughafenstrasse	2.60988e+06	1.26864e+06	functioning	chironomidae	0	0	0	0	20.9	2.1
139	6	2024-08-19	34	monday	Flughafenstrasse	2.60988e+06	1.26864e+06	functioning	psychodidae	0	0	0	0	20.9	2.1
139	6	2024-08-19	34	monday	Flughafenstrasse	2.60988e+06	1.26864e+06	functioning	undefined	0	0	0	0	20.9	2.1
47	2	2024-08-19	34	monday	Mülhauserstrasse	2.61059e+06	1.26862e+06	functioning	aedes	0	0	0	0	20.9	2.1
47	2	2024-08-19	34	monday	Mülhauserstrasse	2.61059e+06	1.26862e+06	functioning	chironomidae	0	0	0	0	20.9	2.1
47	2	2024-08-19	34	monday	Mülhauserstrasse	2.61059e+06	1.26862e+06	functioning	culex	0	0	0	0	20.9	2.1
47	2	2024-08-19	34	monday	Mülhauserstrasse	2.61059e+06	1.26862e+06	functioning	psychodidae	0	0	0	0	20.9	2.1
47	2	2024-08-19	34	monday	Mülhauserstrasse	2.61059e+06	1.26862e+06	functioning	undefined	0	0	0	0	20.9	2.1
82	0	2024-08-19	34	monday	Vogesenstrasse	2.61039e+06	1.26856e+06	functioning	aedes	2	1	0	2	20.9	2.1
82	0	2024-08-19	34	monday	Vogesenstrasse	2.61039e+06	1.26856e+06	functioning	chironomidae	0	0	0	0	20.9	2.1
82	0	2024-08-19	34	monday	Vogesenstrasse	2.61039e+06	1.26856e+06	functioning	culex	0	0	0	0	20.9	2.1
82	0	2024-08-19	34	monday	Vogesenstrasse	2.61039e+06	1.26856e+06	functioning	psychodidae	0	0	0	0	20.9	2.1
82	0	2024-08-19	34	monday	Vogesenstrasse	2.61039e+06	1.26856e+06	functioning	undefined	0	0	0	0	20.9	2.1
170	10	2024-08-19	34	monday	Julia Gauss-Strasse	2.60953e+06	1.26855e+06	functioning	chironomidae	34	15	12	34	20.9	2.1
170	10	2024-08-19	34	monday	Julia Gauss-Strasse	2.60953e+06	1.26855e+06	functioning	aedes	14	8	0	14	20.9	2.1
170	10	2024-08-19	34	monday	Julia Gauss-Strasse	2.60953e+06	1.26855e+06	functioning	undefined	6	0	6	6	20.9	2.1
170	10	2024-08-19	34	monday	Julia Gauss-Strasse	2.60953e+06	1.26855e+06	functioning	culex	0	0	0	0	20.9	2.1
170	10	2024-08-19	34	monday	Julia Gauss-Strasse	2.60953e+06	1.26855e+06	functioning	psychodidae	0	0	0	0	20.9	2.1
173	10	2024-08-19	34	monday	Julia Gauss-Strasse	2.60949e+06	1.26849e+06	functioning	chironomidae	3	2	0	3	20.9	2.1
173	10	2024-08-19	34	monday	Julia Gauss-Strasse	2.60949e+06	1.26849e+06	functioning	aedes	2	1	0	2	20.9	2.1
173	10	2024-08-19	34	monday	Julia Gauss-Strasse	2.60949e+06	1.26849e+06	functioning	culex	0	0	0	0	20.9	2.1
173	10	2024-08-19	34	monday	Julia Gauss-Strasse	2.60949e+06	1.26849e+06	functioning	psychodidae	0	0	0	0	20.9	2.1
173	10	2024-08-19	34	monday	Julia Gauss-Strasse	2.60949e+06	1.26849e+06	functioning	undefined	0	0	0	0	20.9	2.1
71	2	2024-08-19	34	monday	Mülhauserstrasse	2.61043e+06	1.26849e+06	functioning	culex	1	0	0	1	20.9	2.1
71	2	2024-08-19	34	monday	Mülhauserstrasse	2.61043e+06	1.26849e+06	functioning	aedes	0	0	0	0	20.9	2.1
71	2	2024-08-19	34	monday	Mülhauserstrasse	2.61043e+06	1.26849e+06	functioning	chironomidae	0	0	0	0	20.9	2.1
71	2	2024-08-19	34	monday	Mülhauserstrasse	2.61043e+06	1.26849e+06	functioning	psychodidae	0	0	0	0	20.9	2.1
71	2	2024-08-19	34	monday	Mülhauserstrasse	2.61043e+06	1.26849e+06	functioning	undefined	0	0	0	0	20.9	2.1
166	2	2024-08-19	34	monday	Dammerkirchstrasse	2.60965e+06	1.26847e+06	functioning	aedes	0	0	0	0	20.9	2.1
166	2	2024-08-19	34	monday	Dammerkirchstrasse	2.60965e+06	1.26847e+06	functioning	chironomidae	0	0	0	0	20.9	2.1
166	2	2024-08-19	34	monday	Dammerkirchstrasse	2.60965e+06	1.26847e+06	functioning	culex	0	0	0	0	20.9	2.1
166	2	2024-08-19	34	monday	Dammerkirchstrasse	2.60965e+06	1.26847e+06	functioning	psychodidae	0	0	0	0	20.9	2.1
166	2	2024-08-19	34	monday	Dammerkirchstrasse	2.60965e+06	1.26847e+06	functioning	undefined	0	0	0	0	20.9	2.1
19	10	2024-08-19	34	monday	St. Johanns-Vorstadt	2.6108e+06	1.26837e+06	nonfunctioning						20.9	2.1	trap disappeared
22	10	2024-08-19	34	monday	St. Johanns-Platz	2.61077e+06	1.26834e+06	nonfunctioning						20.9	2.1	trap disappeared
97	2	2024-08-19	34	monday	Am Krayenrain	2.61032e+06	1.26833e+06	functioning	aedes	0	0	0	0	20.9	2.1
97	2	2024-08-19	34	monday	Am Krayenrain	2.61032e+06	1.26833e+06	functioning	chironomidae	0	0	0	0	20.9	2.1
97	2	2024-08-19	34	monday	Am Krayenrain	2.61032e+06	1.26833e+06	functioning	culex	0	0	0	0	20.9	2.1
97	2	2024-08-19	34	monday	Am Krayenrain	2.61032e+06	1.26833e+06	functioning	psychodidae	0	0	0	0	20.9	2.1
97	2	2024-08-19	34	monday	Am Krayenrain	2.61032e+06	1.26833e+06	functioning	undefined	0	0	0	0	20.9	2.1
23	6	2024-08-19	34	monday	Pestalozzistrasse	2.61076e+06	1.26832e+06	functioning	aedes	0	0	0	0	20.9	2.1
23	6	2024-08-19	34	monday	Pestalozzistrasse	2.61076e+06	1.26832e+06	functioning	chironomidae	0	0	0	0	20.9	2.1
23	6	2024-08-19	34	monday	Pestalozzistrasse	2.61076e+06	1.26832e+06	functioning	culex	0	0	0	0	20.9	2.1
23	6	2024-08-19	34	monday	Pestalozzistrasse	2.61076e+06	1.26832e+06	functioning	psychodidae	0	0	0	0	20.9	2.1
23	6	2024-08-19	34	monday	Pestalozzistrasse	2.61076e+06	1.26832e+06	functioning	undefined	0	0	0	0	20.9	2.1
24	6	2024-08-19	34	monday	Pestalozzistrasse	2.61075e+06	1.2683e+06	functioning	aedes	0	0	0	0	20.9	2.1
24	6	2024-08-19	34	monday	Pestalozzistrasse	2.61075e+06	1.2683e+06	functioning	chironomidae	0	0	0	0	20.9	2.1
24	6	2024-08-19	34	monday	Pestalozzistrasse	2.61075e+06	1.2683e+06	functioning	culex	0	0	0	0	20.9	2.1
24	6	2024-08-19	34	monday	Pestalozzistrasse	2.61075e+06	1.2683e+06	functioning	psychodidae	0	0	0	0	20.9	2.1
24	6	2024-08-19	34	monday	Pestalozzistrasse	2.61075e+06	1.2683e+06	functioning	undefined	0	0	0	0	20.9	2.1
27	4	2024-08-19	34	monday	Pestalozzistrasse	2.61071e+06	1.26828e+06	functioning	aedes	0	0	0	0	20.9	2.1
27	4	2024-08-19	34	monday	Pestalozzistrasse	2.61071e+06	1.26828e+06	functioning	chironomidae	0	0	0	0	20.9	2.1
27	4	2024-08-19	34	monday	Pestalozzistrasse	2.61071e+06	1.26828e+06	functioning	culex	0	0	0	0	20.9	2.1
27	4	2024-08-19	34	monday	Pestalozzistrasse	2.61071e+06	1.26828e+06	functioning	psychodidae	0	0	0	0	20.9	2.1
27	4	2024-08-19	34	monday	Pestalozzistrasse	2.61071e+06	1.26828e+06	functioning	undefined	0	0	0	0	20.9	2.1
99	6	2024-08-19	34	monday	Metzerstrasse	2.61031e+06	1.26825e+06	functioning	aedes	0	0	0	0	20.9	2.1
99	6	2024-08-19	34	monday	Metzerstrasse	2.61031e+06	1.26825e+06	functioning	chironomidae	0	0	0	0	20.9	2.1
99	6	2024-08-19	34	monday	Metzerstrasse	2.61031e+06	1.26825e+06	functioning	culex	0	0	0	0	20.9	2.1
99	6	2024-08-19	34	monday	Metzerstrasse	2.61031e+06	1.26825e+06	functioning	psychodidae	0	0	0	0	20.9	2.1
99	6	2024-08-19	34	monday	Metzerstrasse	2.61031e+06	1.26825e+06	functioning	undefined	0	0	0	0	20.9	2.1
75	8	2024-08-19	34	monday	Metzerstrasse	2.61041e+06	1.26822e+06	functioning	culex	5	1	2	5	20.9	2.1
75	8	2024-08-19	34	monday	Metzerstrasse	2.61041e+06	1.26822e+06	functioning	aedes	0	0	0	0	20.9	2.1
75	8	2024-08-19	34	monday	Metzerstrasse	2.61041e+06	1.26822e+06	functioning	chironomidae	0	0	0	0	20.9	2.1
75	8	2024-08-19	34	monday	Metzerstrasse	2.61041e+06	1.26822e+06	functioning	psychodidae	0	0	0	0	20.9	2.1
75	8	2024-08-19	34	monday	Metzerstrasse	2.61041e+06	1.26822e+06	functioning	undefined	0	0	0	0	20.9	2.1
26	4	2024-08-19	34	monday	Spitalstrasse	2.61074e+06	1.26821e+06	functioning	chironomidae	4	3	0	4	20.9	2.1
26	4	2024-08-19	34	monday	Spitalstrasse	2.61074e+06	1.26821e+06	functioning	aedes	0	0	0	0	20.9	2.1
26	4	2024-08-19	34	monday	Spitalstrasse	2.61074e+06	1.26821e+06	functioning	culex	0	0	0	0	20.9	2.1
26	4	2024-08-19	34	monday	Spitalstrasse	2.61074e+06	1.26821e+06	functioning	psychodidae	0	0	0	0	20.9	2.1
26	4	2024-08-19	34	monday	Spitalstrasse	2.61074e+06	1.26821e+06	functioning	undefined	0	0	0	0	20.9	2.1
77	4	2024-08-19	34	monday	Metzerstrasse	2.61041e+06	1.26821e+06	functioning	aedes	0	0	0	0	20.9	2.1
77	4	2024-08-19	34	monday	Metzerstrasse	2.61041e+06	1.26821e+06	functioning	chironomidae	0	0	0	0	20.9	2.1
77	4	2024-08-19	34	monday	Metzerstrasse	2.61041e+06	1.26821e+06	functioning	culex	0	0	0	0	20.9	2.1
77	4	2024-08-19	34	monday	Metzerstrasse	2.61041e+06	1.26821e+06	functioning	psychodidae	0	0	0	0	20.9	2.1
77	4	2024-08-19	34	monday	Metzerstrasse	2.61041e+06	1.26821e+06	functioning	undefined	0	0	0	0	20.9	2.1
5	0	2024-08-19	34	monday	St. Johanns-Rheinweg	2.61095e+06	1.26821e+06	functioning	chironomidae	11	8	0	11	20.9	2.1
5	0	2024-08-19	34	monday	St. Johanns-Rheinweg	2.61095e+06	1.26821e+06	functioning	culex	3	2	0	3	20.9	2.1
5	0	2024-08-19	34	monday	St. Johanns-Rheinweg	2.61095e+06	1.26821e+06	functioning	aedes	0	0	0	0	20.9	2.1
5	0	2024-08-19	34	monday	St. Johanns-Rheinweg	2.61095e+06	1.26821e+06	functioning	psychodidae	0	0	0	0	20.9	2.1
5	0	2024-08-19	34	monday	St. Johanns-Rheinweg	2.61095e+06	1.26821e+06	functioning	undefined	0	0	0	0	20.9	2.1
7	10	2024-08-19	34	monday	St. Johanns-Vorstadt	2.61092e+06	1.2682e+06	functioning	aedes	0	0	0	0	20.9	2.1
7	10	2024-08-19	34	monday	St. Johanns-Vorstadt	2.61092e+06	1.2682e+06	functioning	chironomidae	0	0	0	0	20.9	2.1
7	10	2024-08-19	34	monday	St. Johanns-Vorstadt	2.61092e+06	1.2682e+06	functioning	culex	0	0	0	0	20.9	2.1
7	10	2024-08-19	34	monday	St. Johanns-Vorstadt	2.61092e+06	1.2682e+06	functioning	psychodidae	0	0	0	0	20.9	2.1
7	10	2024-08-19	34	monday	St. Johanns-Vorstadt	2.61092e+06	1.2682e+06	functioning	undefined	0	0	0	0	20.9	2.1
65	0	2024-08-19	34	monday	St. Johanns-Ring	2.61046e+06	1.26818e+06	functioning	chironomidae	7	2	4	7	20.9	2.1
65	0	2024-08-19	34	monday	St. Johanns-Ring	2.61046e+06	1.26818e+06	functioning	undefined	1	0	1	1	20.9	2.1
65	0	2024-08-19	34	monday	St. Johanns-Ring	2.61046e+06	1.26818e+06	functioning	culex	1	1	0	1	20.9	2.1
65	0	2024-08-19	34	monday	St. Johanns-Ring	2.61046e+06	1.26818e+06	functioning	aedes	0	0	0	0	20.9	2.1
65	0	2024-08-19	34	monday	St. Johanns-Ring	2.61046e+06	1.26818e+06	functioning	psychodidae	0	0	0	0	20.9	2.1
6	2	2024-08-19	34	monday	St. Johanns-Vorstadt	2.61094e+06	1.26816e+06	functioning	aedes	0	0	0	0	20.9	2.1
6	2	2024-08-19	34	monday	St. Johanns-Vorstadt	2.61094e+06	1.26816e+06	functioning	chironomidae	0	0	0	0	20.9	2.1
6	2	2024-08-19	34	monday	St. Johanns-Vorstadt	2.61094e+06	1.26816e+06	functioning	culex	0	0	0	0	20.9	2.1
6	2	2024-08-19	34	monday	St. Johanns-Vorstadt	2.61094e+06	1.26816e+06	functioning	psychodidae	0	0	0	0	20.9	2.1
6	2	2024-08-19	34	monday	St. Johanns-Vorstadt	2.61094e+06	1.26816e+06	functioning	undefined	0	0	0	0	20.9	2.1
70	6	2024-08-19	34	monday	St. Johanns-Ring	2.61044e+06	1.26816e+06	functioning	aedes	0	0	0	0	20.9	2.1
70	6	2024-08-19	34	monday	St. Johanns-Ring	2.61044e+06	1.26816e+06	functioning	chironomidae	0	0	0	0	20.9	2.1
70	6	2024-08-19	34	monday	St. Johanns-Ring	2.61044e+06	1.26816e+06	functioning	culex	0	0	0	0	20.9	2.1
70	6	2024-08-19	34	monday	St. Johanns-Ring	2.61044e+06	1.26816e+06	functioning	psychodidae	0	0	0	0	20.9	2.1
70	6	2024-08-19	34	monday	St. Johanns-Ring	2.61044e+06	1.26816e+06	functioning	undefined	0	0	0	0	20.9	2.1
103	6	2024-08-19	34	monday	Sommergasse	2.61028e+06	1.26806e+06	functioning	chironomidae	3	2	0	3	20.9	2.1
103	6	2024-08-19	34	monday	Sommergasse	2.61028e+06	1.26806e+06	functioning	aedes	0	0	0	0	20.9	2.1
103	6	2024-08-19	34	monday	Sommergasse	2.61028e+06	1.26806e+06	functioning	culex	0	0	0	0	20.9	2.1
103	6	2024-08-19	34	monday	Sommergasse	2.61028e+06	1.26806e+06	functioning	psychodidae	0	0	0	0	20.9	2.1
103	6	2024-08-19	34	monday	Sommergasse	2.61028e+06	1.26806e+06	functioning	undefined	0	0	0	0	20.9	2.1
39	6	2024-08-19	34	monday	Klingelbergstrasse	2.61066e+06	1.26805e+06	functioning	aedes	0	0	0	0	20.9	2.1
39	6	2024-08-19	34	monday	Klingelbergstrasse	2.61066e+06	1.26805e+06	functioning	chironomidae	0	0	0	0	20.9	2.1
39	6	2024-08-19	34	monday	Klingelbergstrasse	2.61066e+06	1.26805e+06	functioning	culex	0	0	0	0	20.9	2.1
39	6	2024-08-19	34	monday	Klingelbergstrasse	2.61066e+06	1.26805e+06	functioning	psychodidae	0	0	0	0	20.9	2.1
39	6	2024-08-19	34	monday	Klingelbergstrasse	2.61066e+06	1.26805e+06	functioning	undefined	0	0	0	0	20.9	2.1
64	0	2024-08-19	34	monday	Hebelstrasse	2.61048e+06	1.26805e+06	functioning	undefined	5	0	5	5	20.9	2.1
64	0	2024-08-19	34	monday	Hebelstrasse	2.61048e+06	1.26805e+06	functioning	chironomidae	1	1	0	1	20.9	2.1
64	0	2024-08-19	34	monday	Hebelstrasse	2.61048e+06	1.26805e+06	functioning	culex	1	1	0	1	20.9	2.1
64	0	2024-08-19	34	monday	Hebelstrasse	2.61048e+06	1.26805e+06	functioning	aedes	0	0	0	0	20.9	2.1
64	0	2024-08-19	34	monday	Hebelstrasse	2.61048e+06	1.26805e+06	functioning	psychodidae	0	0	0	0	20.9	2.1
3	2	2024-08-19	34	monday	St. Johanns-Vorstadt	2.61102e+06	1.268e+06	functioning	aedes	0	0	0	0	20.9	2.1
3	2	2024-08-19	34	monday	St. Johanns-Vorstadt	2.61102e+06	1.268e+06	functioning	chironomidae	0	0	0	0	20.9	2.1
3	2	2024-08-19	34	monday	St. Johanns-Vorstadt	2.61102e+06	1.268e+06	functioning	culex	0	0	0	0	20.9	2.1
3	2	2024-08-19	34	monday	St. Johanns-Vorstadt	2.61102e+06	1.268e+06	functioning	psychodidae	0	0	0	0	20.9	2.1
3	2	2024-08-19	34	monday	St. Johanns-Vorstadt	2.61102e+06	1.268e+06	functioning	undefined	0	0	0	0	20.9	2.1
38	10	2024-08-19	34	monday	Bernoullistrasse	2.61066e+06	1.26771e+06	functioning	aedes	0	0	0	0	20.9	2.1
38	10	2024-08-19	34	monday	Bernoullistrasse	2.61066e+06	1.26771e+06	functioning	chironomidae	0	0	0	0	20.9	2.1
38	10	2024-08-19	34	monday	Bernoullistrasse	2.61066e+06	1.26771e+06	functioning	culex	0	0	0	0	20.9	2.1
38	10	2024-08-19	34	monday	Bernoullistrasse	2.61066e+06	1.26771e+06	functioning	psychodidae	0	0	0	0	20.9	2.1
38	10	2024-08-19	34	monday	Bernoullistrasse	2.61066e+06	1.26771e+06	functioning	undefined	0	0	0	0	20.9	2.1
42	8	2024-08-19	34	monday	Mittlere Strasse	2.61064e+06	1.26771e+06	functioning	chironomidae	13	8	0	13	20.9	2.1
42	8	2024-08-19	34	monday	Mittlere Strasse	2.61064e+06	1.26771e+06	functioning	undefined	5	0	5	5	20.9	2.1
42	8	2024-08-19	34	monday	Mittlere Strasse	2.61064e+06	1.26771e+06	functioning	culex	1	0	0	1	20.9	2.1
42	8	2024-08-19	34	monday	Mittlere Strasse	2.61064e+06	1.26771e+06	functioning	aedes	0	0	0	0	20.9	2.1
42	8	2024-08-19	34	monday	Mittlere Strasse	2.61064e+06	1.26771e+06	functioning	psychodidae	0	0	0	0	20.9	2.1
130	2	2024-09-05	36	thursday	Schlachthofstrasse	2.61001e+06	1.26953e+06	functioning	aedes	0	0	0	0	20.1	1.4
130	2	2024-09-05	36	thursday	Schlachthofstrasse	2.61001e+06	1.26953e+06	functioning	chironomidae	0	0	0	0	20.1	1.4
130	2	2024-09-05	36	thursday	Schlachthofstrasse	2.61001e+06	1.26953e+06	functioning	culex	0	0	0	0	20.1	1.4
130	2	2024-09-05	36	thursday	Schlachthofstrasse	2.61001e+06	1.26953e+06	functioning	psychodidae	0	0	0	0	20.1	1.4
130	2	2024-09-05	36	thursday	Schlachthofstrasse	2.61001e+06	1.26953e+06	functioning	undefined	0	0	0	0	20.1	1.4
172	2	2024-09-05	36	thursday	Neudorfstrasse	2.60952e+06	1.26945e+06	nonfunctioning						20.1	1.4	fell over
102	0	2024-09-05	36	thursday	Kohlenstrasse	2.61028e+06	1.26944e+06	nonfunctioning						20.1	1.4	fell over
146	10	2024-09-05	36	thursday	Hagenaustrasse	2.60983e+06	1.26923e+06	nonfunctioning						20.1	1.4	fell over
175	6	2024-09-05	36	thursday	Friedrich Miescher-Strasse	2.60946e+06	1.26921e+06	functioning	chironomidae	1	1	0	1	20.1	1.4
175	6	2024-09-05	36	thursday	Friedrich Miescher-Strasse	2.60946e+06	1.26921e+06	functioning	aedes	0	0	0	0	20.1	1.4
175	6	2024-09-05	36	thursday	Friedrich Miescher-Strasse	2.60946e+06	1.26921e+06	functioning	culex	0	0	0	0	20.1	1.4
175	6	2024-09-05	36	thursday	Friedrich Miescher-Strasse	2.60946e+06	1.26921e+06	functioning	psychodidae	0	0	0	0	20.1	1.4
175	6	2024-09-05	36	thursday	Friedrich Miescher-Strasse	2.60946e+06	1.26921e+06	functioning	undefined	0	0	0	0	20.1	1.4
142	2	2024-09-05	36	thursday	Hagenaustrasse	2.60986e+06	1.26916e+06	functioning	aedes	0	0	0	0	20.1	1.4
142	2	2024-09-05	36	thursday	Hagenaustrasse	2.60986e+06	1.26916e+06	functioning	chironomidae	0	0	0	0	20.1	1.4
142	2	2024-09-05	36	thursday	Hagenaustrasse	2.60986e+06	1.26916e+06	functioning	culex	0	0	0	0	20.1	1.4
142	2	2024-09-05	36	thursday	Hagenaustrasse	2.60986e+06	1.26916e+06	functioning	psychodidae	0	0	0	0	20.1	1.4
142	2	2024-09-05	36	thursday	Hagenaustrasse	2.60986e+06	1.26916e+06	functioning	undefined	0	0	0	0	20.1	1.4
162	8	2024-09-05	36	thursday	Neudorfstrasse	2.60975e+06	1.26908e+06	functioning	chironomidae	5	2	0	5	20.1	1.4
162	8	2024-09-05	36	thursday	Neudorfstrasse	2.60975e+06	1.26908e+06	functioning	undefined	2	0	2	2	20.1	1.4
162	8	2024-09-05	36	thursday	Neudorfstrasse	2.60975e+06	1.26908e+06	functioning	aedes	0	0	0	0	20.1	1.4
162	8	2024-09-05	36	thursday	Neudorfstrasse	2.60975e+06	1.26908e+06	functioning	culex	0	0	0	0	20.1	1.4
162	8	2024-09-05	36	thursday	Neudorfstrasse	2.60975e+06	1.26908e+06	functioning	psychodidae	0	0	0	0	20.1	1.4
144	0	2024-09-05	36	thursday	Hagenaustrasse	2.60984e+06	1.26905e+06	functioning	psychodidae	4	0	0	4	20.1	1.4
144	0	2024-09-05	36	thursday	Hagenaustrasse	2.60984e+06	1.26905e+06	functioning	aedes	1	1	0	1	20.1	1.4
144	0	2024-09-05	36	thursday	Hagenaustrasse	2.60984e+06	1.26905e+06	functioning	chironomidae	0	0	0	0	20.1	1.4
144	0	2024-09-05	36	thursday	Hagenaustrasse	2.60984e+06	1.26905e+06	functioning	culex	0	0	0	0	20.1	1.4
144	0	2024-09-05	36	thursday	Hagenaustrasse	2.60984e+06	1.26905e+06	functioning	undefined	0	0	0	0	20.1	1.4
100	10	2024-09-05	36	thursday	Beckenstrasse	2.6103e+06	1.26904e+06	nonfunctioning						20.1	1.4	fell over
106	10	2024-09-05	36	thursday	Hüningerstrasse	2.61027e+06	1268969	nonfunctioning						20.1	1.4	fell over
137	6	2024-09-05	36	thursday	Im Wasenboden	2.60992e+06	1.2689e+06	functioning	chironomidae	4	2	0	4	20.1	1.4
137	6	2024-09-05	36	thursday	Im Wasenboden	2.60992e+06	1.2689e+06	functioning	psychodidae	2	0	2	2	20.1	1.4
137	6	2024-09-05	36	thursday	Im Wasenboden	2.60992e+06	1.2689e+06	functioning	aedes	0	0	0	0	20.1	1.4
137	6	2024-09-05	36	thursday	Im Wasenboden	2.60992e+06	1.2689e+06	functioning	culex	0	0	0	0	20.1	1.4
137	6	2024-09-05	36	thursday	Im Wasenboden	2.60992e+06	1.2689e+06	functioning	undefined	0	0	0	0	20.1	1.4
118	10	2024-09-05	36	thursday	Entenweidstrasse	2.61014e+06	1.26878e+06	functioning	psychodidae	1	0	1	1	20.1	1.4
118	10	2024-09-05	36	thursday	Entenweidstrasse	2.61014e+06	1.26878e+06	functioning	aedes	0	0	0	0	20.1	1.4
[truncated: 7,509 more rows]
